# Supplementary material for: Plate-height model of ion mobility-mass spectrometry
Source: Royal Society of Chemistry journal article supplement (doi:10.1039/d0an00433b), 2020-01-01
Supplement: d0an00433b2.xlsx [file d0an00433b2.xlsx]

## Sheet: inputs
Explanation		Constants
cells require input data from the user		e / C	kB / J mol-1 K-1	ε0 / F m-1	n0 / m-3	unified atomic mass / kg	π
		1.60218e-19	1.38065e-23	8.85419e-12	2.68678e+25	1.66054e-27	3.14159
no input required, values will be calculated		elementary charge in coulombs	Boltzmann constant	vacuum permittivity in farads per meter	Loschmidt constant at 273.15 K and 101 325 Pa	unified atomic mass in kilograms
physical and mathematical constants, do not require modification
		Instrument parameters and settings
		Ldrift cell / m	Lexit funnel / m	p / mbar	T / K	n / m-3	tinjection		Cinjection	CCoulomb	θ	Vexit funnel / volt
Output values will be calculated							in µs	in s
		1	0.15	6	300	1.46779e+23	250	0.00025	12	0.333333	1	150
Explanation of the respective cell's content		length of the drift cell in meters	length of the exit funnel in meters	pressure inside the drift region in millibars	temperature of the buffer gas in kelvin	buffer gas number density	injection pulse-length in microseconds	injection pulse-length in seconds	for rectangular injection profile 12; for Gaussian 16; see Table 1 in Section 3.4	for continuous uniform ion distribution 1/3; see Section S3.3	correction factor for electric field inhomogeneities; in ideal case 1	voltage in the exit funnel in volts
		Ion and buffer gas characteristics
		Ω (collision cross section)		m/z	z	Q / in units of e	mbuffer gas		µ (reduced mass)		Transport properties
		in Å2	in m2				in Da	in kg	in Da	in kg	K0 (m2 V-1 s-1)	K (m2 V-1 s-1)	D (m2 s-1)
		100	1e-18	300	1	100000	4.0026	6.64647e-27	3.9499	6.55896e-27	0.000537712	0.0984279	0.00254456
		collision cross section of the ion in the given buffer gas in Å2	collision cross section of the ion in the given buffer gas in m2	mass-to-charge ratio of the ion	charge state of the ion	total charge of the ion cloud in units of elementary charge	mass of the buffer gas particles in daltons	mass of the buffer gas particles in kilograms	reduced mass of the collision complex in daltons	reduced mass of the collision complex in kilograms	reduced ion mobility	ion mobility	diffusion coefficient
		Integrated terms
		A (Post-cell)	B (Injection)	C (Coulomb)	D (Diffusion)
		1.31332e-11	5.04586e-11	0.00190485	0.051704
		the integrated terms in equations 34-37 in Section 4.1

## Sheet: output
the integrated terms in equations 34-37 in Section 4.1					drift voltage in volts (voltage between the two end of the drift tube, does not involve the funnel voltage)	ratio of zone velocities in the drift cell and in the exit funnel; see equations 35-37	contribution of post-cell dispersion to HETP / in meters	contribution of the injection pulse-width to HETP / in meters	contribution of Coulomb repulsion to HETP / in meters	contribution of longitudinal diffusion to HETP / in meters	apparent effective plate height / in meters		apparent effective plate height / µm	number of theoretical plates	resolving power
Integrated terms					Vdrift / volts	vcell/vfunnel	HETP						HETPapp / µm	Napp	Rp;app
A (Post-cell)	B (Injection)	C (Coulomb)	D (Diffusion)				Post-cell	Injection	Coulomb	Diffusion	SUM
1.31332e-11	5.04586e-11	0.00190485	0.051704		1	0.001	1.50986e-11	5.801e-11	0.00218992	0.0594418	0.0616317		61631.7	18.6592	1.83438
					2	0.002	6.03765e-11	2.31971e-10	0.00137915	0.029712	0.0310911		31091.1	36.9881	2.58269
					3	0.003	1.35806e-10	5.21777e-10	0.00105217	0.019802	0.0208542		20854.2	55.1447	3.15351
					4	0.004	2.41361e-10	9.27326e-10	0.000868289	0.0148471	0.0157154		15715.4	73.1768	3.63269
					5	0.005	3.77014e-10	1.44851e-09	0.000748044	0.0118741	0.0126221		12622.1	91.1097	4.05345
					6	0.006	5.42737e-10	2.08523e-09	0.000662231	0.00989212	0.0105544		10554.4	108.96	4.43277
					7	0.007	7.38504e-10	2.83738e-09	0.000597377	0.00847642	0.0090738		9073.8	126.739	4.78076
					8	0.008	9.64288e-10	3.70486e-09	0.000546332	0.00741464	0.00796098		7960.98	144.455	5.10397
					9	0.009	1.22006e-09	4.68756e-09	0.000504923	0.00658882	0.00709375		7093.75	162.115	5.40696
					10	0.01	1.5058e-09	5.78537e-09	0.000470533	0.00592816	0.0063987		6398.7	179.724	5.69305
					11	0.011	1.82147e-09	6.99821e-09	0.000441433	0.00538762	0.00582907		5829.07	197.287	5.96474
					12	0.012	2.16705e-09	8.32595e-09	0.00041643	0.00493718	0.00535362		5353.62	214.808	6.22397
					13	0.013	2.54251e-09	9.7685e-09	0.000394673	0.00455603	0.00495072		4950.72	232.29	6.47228
					14	0.014	2.94783e-09	1.13258e-08	0.000375536	0.00422933	0.00460488		4604.88	249.735	6.71092
					15	0.015	3.38297e-09	1.29976e-08	0.000358547	0.0039462	0.00430476		4304.76	267.146	6.94092
					16	0.016	3.84792e-09	1.4784e-08	0.000343344	0.00369845	0.00404181		4041.81	284.526	7.16313
					17	0.017	4.34264e-09	1.66847e-08	0.000329646	0.00347985	0.00380952		3809.52	301.875	7.3783
					18	0.018	4.86711e-09	1.86998e-08	0.000317226	0.00328555	0.00360279		3602.79	319.197	7.58702
					19	0.019	5.4213e-09	2.0829e-08	0.000305903	0.00311169	0.00341762		3417.62	336.491	7.78985
					20	0.02	6.00519e-09	2.30723e-08	0.000295531	0.00295522	0.00325078		3250.78	353.761	7.98725
					21	0.021	6.61874e-09	2.54296e-08	0.000285988	0.00281366	0.00309968		3099.68	371.007	8.17962
					22	0.022	7.26193e-09	2.79008e-08	0.000277171	0.00268496	0.00296217		2962.17	388.229	8.36732
					23	0.023	7.93474e-09	3.04858e-08	0.000268998	0.00256745	0.00283649		2836.49	405.431	8.55068
					24	0.024	8.63713e-09	3.31844e-08	0.000261395	0.00245974	0.00272118		2721.18	422.611	8.72997
					25	0.025	9.36909e-09	3.59967e-08	0.000254301	0.00236065	0.00261499		2614.99	439.772	8.90545
					26	0.026	1.01306e-08	3.89224e-08	0.000247664	0.00226917	0.00251689		2516.89	456.914	9.07736
					27	0.027	1.09216e-08	4.19614e-08	0.000241438	0.00218448	0.00242597		2425.97	474.038	9.24589
					28	0.028	1.17421e-08	4.51138e-08	0.000235584	0.00210583	0.00234147		2341.47	491.144	9.41124
					29	0.029	1.2592e-08	4.83793e-08	0.000230068	0.00203261	0.00226274		2262.74	508.234	9.57357
					30	0.03	1.34713e-08	5.17578e-08	0.000224859	0.00196427	0.00218919		2189.19	525.308	9.73305
					31	0.031	1.43801e-08	5.52494e-08	0.000219932	0.00190034	0.00212034		2120.34	542.366	9.88982
					32	0.032	1.53182e-08	5.88537e-08	0.000215261	0.0018404	0.00205574		2055.74	559.41	10.044
					33	0.033	1.62857e-08	6.25709e-08	0.000210827	0.0017841	0.00199501		1995.01	576.439	10.1957
					34	0.034	1.72825e-08	6.64007e-08	0.000206611	0.00173111	0.0019378		1937.8	593.455	10.3451
					35	0.035	1.83086e-08	7.03431e-08	0.000202596	0.00168115	0.00188383		1883.83	610.458	10.4923
					36	0.036	1.9364e-08	7.43979e-08	0.000198768	0.00163396	0.00183282		1832.82	627.448	10.6373
					37	0.037	2.04486e-08	7.85651e-08	0.000195112	0.00158933	0.00178454		1784.54	644.425	10.7802
					38	0.038	2.15625e-08	8.28445e-08	0.000191616	0.00154704	0.00173876		1738.76	661.391	10.9212
					39	0.039	2.27055e-08	8.72361e-08	0.000188271	0.00150692	0.0016953		1695.3	678.345	11.0603
					40	0.04	2.38777e-08	9.17397e-08	0.000185064	0.00146881	0.00165399		1653.99	695.288	11.1976
					41	0.041	2.5079e-08	9.63553e-08	0.000181988	0.00143256	0.00161467		1614.67	712.22	11.3331
					42	0.042	2.63095e-08	1.01083e-07	0.000179035	0.00139803	0.0015772		1577.2	729.142	11.467
					43	0.043	2.7569e-08	1.05922e-07	0.000176196	0.00136511	0.00154144		1541.44	746.054	11.5992
					44	0.044	2.88576e-08	1.10873e-07	0.000173464	0.00133369	0.0015073		1507.3	762.956	11.7298
					45	0.045	3.01752e-08	1.15935e-07	0.000170834	0.00130367	0.00147465		1474.65	779.848	11.859
					46	0.046	3.15218e-08	1.21109e-07	0.000168299	0.00127495	0.0014434		1443.4	796.732	11.9867
					47	0.047	3.28974e-08	1.26394e-07	0.000165854	0.00124745	0.00141346		1413.46	813.607	12.1129
					48	0.048	3.4302e-08	1.31791e-07	0.000163493	0.00122109	0.00138475		1384.75	830.472	12.2378
					49	0.049	3.57355e-08	1.37298e-07	0.000161213	0.00119582	0.0013572		1357.2	847.33	12.3614
					50	0.05	3.71979e-08	1.42917e-07	0.000159009	0.00117155	0.00133074		1330.74	864.18	12.4837
					51	0.051	3.86892e-08	1.48646e-07	0.000156877	0.00114824	0.0013053		1305.3	881.021	12.6048
					52	0.052	4.02093e-08	1.54487e-07	0.000154813	0.00112582	0.00128083		1280.83	897.855	12.7246
					53	0.053	4.17582e-08	1.60438e-07	0.000152814	0.00110425	0.00125727		1257.27	914.682	12.8433
					54	0.054	4.3336e-08	1.665e-07	0.000150877	0.00108348	0.00123457		1234.57	931.501	12.9609
					55	0.055	4.49425e-08	1.72672e-07	0.000148998	0.00106346	0.00121268		1212.68	948.313	13.0773
					56	0.056	4.65778e-08	1.78955e-07	0.000147175	0.00104416	0.00119156		1191.56	965.118	13.1927
					57	0.057	4.82418e-08	1.85348e-07	0.000145405	0.00102554	0.00117118		1171.18	981.917	13.307
					58	0.058	4.99344e-08	1.91852e-07	0.000143686	0.00100756	0.00115149		1151.49	998.709	13.4203
					59	0.059	5.16558e-08	1.98465e-07	0.000142016	0.000990186	0.00113245		1132.45	1015.5	13.5326
					60	0.06	5.34058e-08	2.05189e-07	0.000140392	0.000973393	0.00111404		1114.04	1032.28	13.6439
					61	0.061	5.51844e-08	2.12022e-07	0.000138812	0.000957152	0.00109623		1096.23	1049.05	13.7544
					62	0.062	5.69916e-08	2.18966e-07	0.000137275	0.000941434	0.00107898		1078.98	1065.82	13.8638
					63	0.063	5.88274e-08	2.26019e-07	0.000135778	0.000926215	0.00106228		1062.28	1082.58	13.9724
					64	0.064	6.06917e-08	2.33182e-07	0.00013432	0.000911472	0.00104609		1046.09	1099.34	14.0802
					65	0.065	6.25846e-08	2.40454e-07	0.000132899	0.000897183	0.00103038		1030.38	1116.09	14.187
					66	0.066	6.45059e-08	2.47836e-07	0.000131514	0.000883327	0.00101515		1015.15	1132.83	14.2931
					67	0.067	6.64557e-08	2.55327e-07	0.000130164	0.000869884	0.00100037		1000.37	1149.58	14.3983
					68	0.068	6.84339e-08	2.62928e-07	0.000128846	0.000856837	0.000986015		986.015	1166.31	14.5027
					69	0.069	7.04406e-08	2.70637e-07	0.00012756	0.000844169	0.00097207		972.07	1183.04	14.6064
					70	0.07	7.24756e-08	2.78456e-07	0.000126305	0.000831862	0.000958518		958.518	1199.77	14.7093
					71	0.071	7.4539e-08	2.86384e-07	0.000125079	0.000819902	0.000945342		945.342	1216.49	14.8114
					72	0.072	7.66307e-08	2.9442e-07	0.000123882	0.000808275	0.000932527		932.527	1233.21	14.9128
					73	0.073	7.87507e-08	3.02566e-07	0.000122711	0.000796966	0.000920058		920.058	1249.92	15.0136
					74	0.074	8.08991e-08	3.1082e-07	0.000121567	0.000785963	0.000907922		907.922	1266.63	15.1136
					75	0.075	8.30757e-08	3.19182e-07	0.000120448	0.000775253	0.000896104		896.104	1283.33	15.2129
					76	0.076	8.52805e-08	3.27653e-07	0.000119354	0.000764826	0.000884593		884.593	1300.03	15.3116
					77	0.077	8.75135e-08	3.36233e-07	0.000118283	0.000754669	0.000873376		873.376	1316.73	15.4096
					78	0.078	8.97747e-08	3.44921e-07	0.000117235	0.000744773	0.000862443		862.443	1333.42	15.5069
					79	0.079	9.20641e-08	3.53716e-07	0.000116209	0.000735127	0.000851783		851.783	1350.11	15.6037
					80	0.08	9.43816e-08	3.6262e-07	0.000115205	0.000725723	0.000841385		841.385	1366.79	15.6998
					81	0.081	9.67272e-08	3.71632e-07	0.000114221	0.000716551	0.00083124		831.24	1383.47	15.7953
					82	0.082	9.91009e-08	3.80752e-07	0.000113257	0.000707603	0.00082134		821.34	1400.15	15.8902
					83	0.083	1.01503e-07	3.8998e-07	0.000112312	0.000698871	0.000811674		811.674	1416.83	15.9845
					84	0.084	1.03932e-07	3.99315e-07	0.000111386	0.000690346	0.000802235		802.235	1433.49	16.0783
					85	0.085	1.0639e-07	4.08758e-07	0.000110478	0.000682022	0.000793015		793.015	1450.16	16.1715
					86	0.086	1.08876e-07	4.18309e-07	0.000109587	0.000673892	0.000784007		784.007	1466.82	16.2641
					87	0.087	1.1139e-07	4.27967e-07	0.000108714	0.000665949	0.000775202		775.202	1483.48	16.3563
					88	0.088	1.13931e-07	4.37732e-07	0.000107857	0.000658186	0.000766595		766.595	1500.14	16.4478
					89	0.089	1.16501e-07	4.47605e-07	0.000107015	0.000650598	0.000758178		758.178	1516.79	16.5389
					90	0.09	1.19098e-07	4.57584e-07	0.00010619	0.000643179	0.000749946		749.946	1533.44	16.6294
					91	0.091	1.21724e-07	4.67671e-07	0.000105379	0.000635923	0.000741892		741.892	1550.09	16.7194
					92	0.092	1.24377e-07	4.77864e-07	0.000104583	0.000628825	0.00073401		734.01	1566.74	16.8089
					93	0.093	1.27058e-07	4.88165e-07	0.000103801	0.000621879	0.000726296		726.296	1583.38	16.898
					94	0.094	1.29766e-07	4.98572e-07	0.000103034	0.000615081	0.000718743		718.743	1600.02	16.9865
					95	0.095	1.32503e-07	5.09085e-07	0.000102279	0.000608427	0.000711347		711.347	1616.65	17.0746
					96	0.096	1.35267e-07	5.19706e-07	0.000101537	0.000601911	0.000704103		704.103	1633.28	17.1622
					97	0.097	1.38059e-07	5.30432e-07	0.000100809	0.00059553	0.000697007		697.007	1649.91	17.2494
					98	0.098	1.40879e-07	5.41265e-07	0.000100092	0.000589278	0.000690053		690.053	1666.54	17.336
					99	0.099	1.43726e-07	5.52205e-07	9.93874e-05	0.000583154	0.000683237		683.237	1683.16	17.4223
					100	0.1	1.46601e-07	5.6325e-07	9.86946e-05	0.000577152	0.000676556		676.556	1699.79	17.5081
					101	0.101	1.49503e-07	5.74402e-07	9.80131e-05	0.000571268	0.000670005		670.005	1716.4	17.5935
					102	0.102	1.52433e-07	5.85659e-07	9.73426e-05	0.000565501	0.000663581		663.581	1733.02	17.6784
					103	0.103	1.55391e-07	5.97023e-07	9.6683e-05	0.000559845	0.00065728		657.28	1749.63	17.763
					104	0.104	1.58376e-07	6.08492e-07	9.60339e-05	0.000554298	0.000651099		651.099	1766.25	17.8471
					105	0.105	1.61389e-07	6.20067e-07	9.5395e-05	0.000548857	0.000645033		645.033	1782.85	17.9308
					106	0.106	1.64429e-07	6.31747e-07	9.47661e-05	0.000543518	0.000639081		639.081	1799.46	18.0141
					107	0.107	1.67496e-07	6.43533e-07	9.41469e-05	0.00053828	0.000633238		633.238	1816.06	18.0971
					108	0.108	1.70592e-07	6.55424e-07	9.35372e-05	0.000533138	0.000627501		627.501	1832.67	18.1796
					109	0.109	1.73714e-07	6.67421e-07	9.29368e-05	0.000528091	0.000621869		621.869	1849.26	18.2617
					110	0.11	1.76864e-07	6.79523e-07	9.23454e-05	0.000523136	0.000616338		616.338	1865.86	18.3435
					111	0.111	1.80041e-07	6.9173e-07	9.17629e-05	0.00051827	0.000610905		610.905	1882.45	18.4249
					112	0.112	1.83245e-07	7.04042e-07	9.11889e-05	0.000513491	0.000605567		605.567	1899.05	18.5059
					113	0.113	1.86477e-07	7.16459e-07	9.06234e-05	0.000508797	0.000600323		600.323	1915.64	18.5865
					114	0.114	1.89736e-07	7.2898e-07	9.00661e-05	0.000504185	0.00059517		595.17	1932.22	18.6668
					115	0.115	1.93023e-07	7.41607e-07	8.95168e-05	0.000499653	0.000590105		590.105	1948.81	18.7468
					116	0.116	1.96336e-07	7.54338e-07	8.89754e-05	0.0004952	0.000585126		585.126	1965.39	18.8264
					117	0.117	1.99677e-07	7.67173e-07	8.84416e-05	0.000490823	0.000580231		580.231	1981.97	18.9056
					118	0.118	2.03045e-07	7.80114e-07	8.79153e-05	0.00048652	0.000575418		575.418	1998.55	18.9845
					119	0.119	2.0644e-07	7.93158e-07	8.73963e-05	0.000482289	0.000570685		570.685	2015.12	19.0631
					120	0.12	2.09863e-07	8.06307e-07	8.68845e-05	0.000478129	0.00056603		566.03	2031.7	19.1413
					121	0.121	2.13312e-07	8.1956e-07	8.63797e-05	0.000474038	0.00056145		561.45	2048.27	19.2192
					122	0.122	2.16789e-07	8.32917e-07	8.58817e-05	0.000470014	0.000556945		556.945	2064.83	19.2968
					123	0.123	2.20292e-07	8.46378e-07	8.53904e-05	0.000466055	0.000552512		552.512	2081.4	19.374
					124	0.124	2.23823e-07	8.59942e-07	8.49057e-05	0.000462161	0.00054815		548.15	2097.97	19.451
					125	0.125	2.2738e-07	8.73611e-07	8.44274e-05	0.000458328	0.000543857		543.857	2114.53	19.5276
					126	0.126	2.30965e-07	8.87383e-07	8.39554e-05	0.000454557	0.000539631		539.631	2131.09	19.6039
					127	0.127	2.34577e-07	9.01259e-07	8.34895e-05	0.000450845	0.00053547		535.47	2147.64	19.6799
					128	0.128	2.38215e-07	9.15239e-07	8.30296e-05	0.000447191	0.000531374		531.374	2164.2	19.7556
					129	0.129	2.41881e-07	9.29322e-07	8.25757e-05	0.000443594	0.000527341		527.341	2180.75	19.831
					130	0.13	2.45573e-07	9.43508e-07	8.21275e-05	0.000440052	0.000523369		523.369	2197.3	19.9062
					131	0.131	2.49292e-07	9.57798e-07	8.1685e-05	0.000436565	0.000519457		519.457	2213.85	19.981
					132	0.132	2.53038e-07	9.7219e-07	8.1248e-05	0.00043313	0.000515603		515.603	2230.4	20.0555
					133	0.133	2.56811e-07	9.86686e-07	8.08164e-05	0.000429747	0.000511807		511.807	2246.94	20.1297
					134	0.134	2.60611e-07	1.00128e-06	8.03902e-05	0.000426414	0.000508066		508.066	2263.48	20.2037
					135	0.135	2.64437e-07	1.01599e-06	7.99692e-05	0.000423131	0.000504381		504.381	2280.02	20.2774
					136	0.136	2.6829e-07	1.03079e-06	7.95533e-05	0.000419896	0.000500749		500.749	2296.56	20.3508
					137	0.137	2.7217e-07	1.0457e-06	7.91425e-05	0.000416709	0.000497169		497.169	2313.1	20.4239
					138	0.138	2.76077e-07	1.06071e-06	7.87365e-05	0.000413568	0.000493641		493.641	2329.63	20.4968
					139	0.139	2.8001e-07	1.07582e-06	7.83354e-05	0.000410472	0.000490163		490.163	2346.16	20.5694
					140	0.14	2.8397e-07	1.09103e-06	7.79391e-05	0.00040742	0.000486734		486.734	2362.69	20.6417
					141	0.141	2.87957e-07	1.10635e-06	7.75473e-05	0.000404412	0.000483353		483.353	2379.21	20.7138
					142	0.142	2.9197e-07	1.12177e-06	7.71601e-05	0.000401446	0.00048002		480.02	2395.73	20.7856
					143	0.143	2.9601e-07	1.13729e-06	7.67775e-05	0.000398521	0.000476732		476.732	2412.26	20.8571
					144	0.144	3.00076e-07	1.15291e-06	7.63991e-05	0.000395638	0.00047349		473.49	2428.77	20.9284
					145	0.145	3.04169e-07	1.16864e-06	7.60252e-05	0.000392794	0.000470292		470.292	2445.29	20.9994
					146	0.146	3.08288e-07	1.18447e-06	7.56554e-05	0.000389989	0.000467137		467.137	2461.8	21.0702
					147	0.147	3.12434e-07	1.20039e-06	7.52898e-05	0.000387222	0.000464025		464.025	2478.32	21.1408
					148	0.148	3.16607e-07	1.21642e-06	7.49283e-05	0.000384493	0.000460954		460.954	2494.82	21.2111
					149	0.149	3.20805e-07	1.23256e-06	7.45708e-05	0.000381801	0.000457925		457.925	2511.33	21.2811
					150	0.15	3.25031e-07	1.24879e-06	7.42172e-05	0.000379144	0.000454935		454.935	2527.83	21.3509
					151	0.151	3.29282e-07	1.26512e-06	7.38675e-05	0.000376523	0.000451984		451.984	2544.34	21.4205
					152	0.152	3.3356e-07	1.28156e-06	7.35216e-05	0.000373936	0.000449072		449.072	2560.83	21.4898
					153	0.153	3.37864e-07	1.2981e-06	7.31794e-05	0.000371383	0.000446198		446.198	2577.33	21.5589
					154	0.154	3.42195e-07	1.31474e-06	7.28409e-05	0.000368863	0.000443361		443.361	2593.82	21.6278
					155	0.155	3.46552e-07	1.33148e-06	7.2506e-05	0.000366376	0.00044056		440.56	2610.32	21.6965
					156	0.156	3.50935e-07	1.34832e-06	7.21747e-05	0.000363921	0.000437794		437.794	2626.8	21.7649
					157	0.157	3.55344e-07	1.36526e-06	7.18468e-05	0.000361497	0.000435064		435.064	2643.29	21.8331
					158	0.158	3.5978e-07	1.3823e-06	7.15224e-05	0.000359103	0.000432368		432.368	2659.77	21.901
					159	0.159	3.64242e-07	1.39944e-06	7.12013e-05	0.00035674	0.000429705		429.705	2676.25	21.9688
					160	0.16	3.6873e-07	1.41669e-06	7.08835e-05	0.000354407	0.000427076		427.076	2692.73	22.0363
					161	0.161	3.73244e-07	1.43403e-06	7.0569e-05	0.000352102	0.000424479		424.479	2709.21	22.1036
					162	0.162	3.77784e-07	1.45147e-06	7.02578e-05	0.000349826	0.000421913		421.913	2725.68	22.1707
					163	0.163	3.82351e-07	1.46902e-06	6.99496e-05	0.000347578	0.000419379		419.379	2742.15	22.2376
					164	0.164	3.86943e-07	1.48666e-06	6.96446e-05	0.000345358	0.000416876		416.876	2758.61	22.3043
					165	0.165	3.91562e-07	1.50441e-06	6.93426e-05	0.000343164	0.000414403		414.403	2775.08	22.3707
					166	0.166	3.96206e-07	1.52225e-06	6.90436e-05	0.000340997	0.000411959		411.959	2791.54	22.437
					167	0.167	4.00877e-07	1.5402e-06	6.87476e-05	0.000338856	0.000409545		409.545	2808	22.503
					168	0.168	4.05574e-07	1.55824e-06	6.84545e-05	0.000336741	0.000407159		407.159	2824.45	22.5688
					169	0.169	4.10296e-07	1.57639e-06	6.81642e-05	0.00033465	0.000404801		404.801	2840.9	22.6345
					170	0.17	4.15045e-07	1.59463e-06	6.78768e-05	0.000332584	0.000402471		402.471	2857.35	22.6999
					171	0.171	4.19819e-07	1.61297e-06	6.75921e-05	0.000330543	0.000400168		400.168	2873.8	22.7651
					172	0.172	4.24619e-07	1.63142e-06	6.73102e-05	0.000328525	0.000397891		397.891	2890.24	22.8302
					173	0.173	4.29446e-07	1.64996e-06	6.7031e-05	0.00032653	0.000395641		395.641	2906.68	22.895
					174	0.174	4.34298e-07	1.6686e-06	6.67544e-05	0.000324559	0.000393416		393.416	2923.11	22.9596
					175	0.175	4.39175e-07	1.68734e-06	6.64804e-05	0.00032261	0.000391217		391.217	2939.55	23.0241
					176	0.176	4.44079e-07	1.70618e-06	6.6209e-05	0.000320683	0.000389042		389.042	2955.98	23.0883
					177	0.177	4.49009e-07	1.72512e-06	6.59401e-05	0.000318778	0.000386892		386.892	2972.4	23.1524
					178	0.178	4.53964e-07	1.74416e-06	6.56737e-05	0.000316895	0.000384766		384.766	2988.83	23.2163
					179	0.179	4.58945e-07	1.7633e-06	6.54098e-05	0.000315032	0.000382664		382.664	3005.25	23.28
					180	0.18	4.63951e-07	1.78253e-06	6.51482e-05	0.000313191	0.000380585		380.585	3021.66	23.3435
					181	0.181	4.68984e-07	1.80187e-06	6.48891e-05	0.000311369	0.000378529		378.529	3038.07	23.4068
					182	0.182	4.74042e-07	1.8213e-06	6.46323e-05	0.000309568	0.000376496		376.496	3054.48	23.4699
					183	0.183	4.79125e-07	1.84083e-06	6.43779e-05	0.000307786	0.000374484		374.484	3070.89	23.5328
					184	0.184	4.84235e-07	1.86046e-06	6.41257e-05	0.000306024	0.000372495		372.495	3087.29	23.5956
					185	0.185	4.89369e-07	1.88019e-06	6.38757e-05	0.000304281	0.000370527		370.527	3103.69	23.6582
					186	0.186	4.9453e-07	1.90002e-06	6.3628e-05	0.000302557	0.00036858		368.58	3120.09	23.7206
					187	0.187	4.99716e-07	1.91994e-06	6.33825e-05	0.000300851	0.000366653		366.653	3136.48	23.7828
					188	0.188	5.04927e-07	1.93996e-06	6.31391e-05	0.000299164	0.000364748		364.748	3152.86	23.8449
					189	0.189	5.10164e-07	1.96009e-06	6.28978e-05	0.000297494	0.000362862		362.862	3169.25	23.9067
					190	0.19	5.15427e-07	1.9803e-06	6.26586e-05	0.000295842	0.000360996		360.996	3185.63	23.9684
					191	0.191	5.20715e-07	2.00062e-06	6.24215e-05	0.000294207	0.00035915		359.15	3202	24.03
					192	0.192	5.26028e-07	2.02104e-06	6.21865e-05	0.00029259	0.000357323		357.323	3218.38	24.0913
					193	0.193	5.31367e-07	2.04155e-06	6.19534e-05	0.000290989	0.000355515		355.515	3234.74	24.1525
					194	0.194	5.36731e-07	2.06216e-06	6.17223e-05	0.000289404	0.000353726		353.726	3251.11	24.2135
					195	0.195	5.4212e-07	2.08286e-06	6.14932e-05	0.000287836	0.000351955		351.955	3267.47	24.2744
					196	0.196	5.47535e-07	2.10367e-06	6.1266e-05	0.000286284	0.000350202		350.202	3283.82	24.335
					197	0.197	5.52975e-07	2.12457e-06	6.10407e-05	0.000284748	0.000348466		348.466	3300.17	24.3956
					198	0.198	5.58441e-07	2.14557e-06	6.08173e-05	0.000283227	0.000346749		346.749	3316.52	24.4559
					199	0.199	5.63932e-07	2.16666e-06	6.05957e-05	0.000281722	0.000345048		345.048	3332.87	24.5161
					200	0.2	5.69448e-07	2.18786e-06	6.0376e-05	0.000280232	0.000343365		343.365	3349.2	24.5761
					201	0.201	5.74989e-07	2.20915e-06	6.0158e-05	0.000278756	0.000341699		341.699	3365.54	24.636
					202	0.202	5.80555e-07	2.23053e-06	5.99419e-05	0.000277296	0.000340049		340.049	3381.87	24.6957
					203	0.203	5.86147e-07	2.25202e-06	5.97275e-05	0.000275849	0.000338415		338.415	3398.19	24.7552
					204	0.204	5.91764e-07	2.2736e-06	5.95148e-05	0.000274417	0.000336797		336.797	3414.51	24.8146
					205	0.205	5.97406e-07	2.29527e-06	5.93038e-05	0.000272999	0.000335196		335.196	3430.83	24.8738
					206	0.206	6.03073e-07	2.31705e-06	5.90945e-05	0.000271595	0.00033361		333.61	3447.14	24.9328
					207	0.207	6.08765e-07	2.33892e-06	5.88869e-05	0.000270204	0.000332039		332.039	3463.45	24.9918
					208	0.208	6.14482e-07	2.36088e-06	5.8681e-05	0.000268827	0.000330483		330.483	3479.75	25.0505
					209	0.209	6.20224e-07	2.38294e-06	5.84766e-05	0.000267463	0.000328943		328.943	3496.05	25.1091
					210	0.21	6.25991e-07	2.4051e-06	5.82739e-05	0.000266112	0.000327417		327.417	3512.34	25.1675
					211	0.211	6.31784e-07	2.42736e-06	5.80727e-05	0.000264774	0.000325906		325.906	3528.63	25.2258
					212	0.212	6.37601e-07	2.44971e-06	5.78731e-05	0.000263448	0.000324409		324.409	3544.91	25.284
					213	0.213	6.43443e-07	2.47215e-06	5.76751e-05	0.000262135	0.000322926		322.926	3561.19	25.3419
					214	0.214	6.4931e-07	2.49469e-06	5.74786e-05	0.000260834	0.000321457		321.457	3577.46	25.3998
					215	0.215	6.55202e-07	2.51733e-06	5.72835e-05	0.000259546	0.000320002		320.002	3593.73	25.4575
					216	0.216	6.61119e-07	2.54007e-06	5.709e-05	0.000258269	0.00031856		318.56	3609.99	25.515
					217	0.217	6.67061e-07	2.56289e-06	5.68979e-05	0.000257004	0.000317132		317.132	3626.25	25.5724
					218	0.218	6.73028e-07	2.58582e-06	5.67073e-05	0.000255751	0.000315717		315.717	3642.5	25.6296
					219	0.219	6.79019e-07	2.60884e-06	5.65182e-05	0.000254509	0.000314315		314.315	3658.75	25.6867
					220	0.22	6.85035e-07	2.63195e-06	5.63304e-05	0.000253279	0.000312926		312.926	3674.99	25.7437
					221	0.221	6.91076e-07	2.65516e-06	5.6144e-05	0.000252059	0.00031155		311.55	3691.22	25.8005
					222	0.222	6.97142e-07	2.67847e-06	5.59591e-05	0.000250851	0.000310186		310.186	3707.45	25.8571
					223	0.223	7.03233e-07	2.70187e-06	5.57755e-05	0.000249654	0.000308834		308.834	3723.68	25.9136
					224	0.224	7.09348e-07	2.72536e-06	5.55932e-05	0.000248467	0.000307495		307.495	3739.9	25.97
					225	0.225	7.15488e-07	2.74895e-06	5.54123e-05	0.000247291	0.000306168		306.168	3756.11	26.0262
					226	0.226	7.21652e-07	2.77264e-06	5.52327e-05	0.000246125	0.000304852		304.852	3772.32	26.0823
					227	0.227	7.27842e-07	2.79642e-06	5.50543e-05	0.00024497	0.000303549		303.549	3788.52	26.1383
					228	0.228	7.34056e-07	2.82029e-06	5.48773e-05	0.000243825	0.000302257		302.257	3804.71	26.1941
					229	0.229	7.40294e-07	2.84426e-06	5.47016e-05	0.00024269	0.000300976		300.976	3820.9	26.2498
					230	0.23	7.46557e-07	2.86832e-06	5.45271e-05	0.000241565	0.000299707		299.707	3837.09	26.3053
					231	0.231	7.52845e-07	2.89248e-06	5.43539e-05	0.000240449	0.000298448		298.448	3853.26	26.3607
					232	0.232	7.59157e-07	2.91673e-06	5.41818e-05	0.000239343	0.000297201		297.201	3869.44	26.4159
					233	0.233	7.65493e-07	2.94108e-06	5.4011e-05	0.000238247	0.000295965		295.965	3885.6	26.4711
					234	0.234	7.71854e-07	2.96552e-06	5.38415e-05	0.00023716	0.000294739		294.739	3901.76	26.526
					235	0.235	7.7824e-07	2.99005e-06	5.3673e-05	0.000236082	0.000293524		293.524	3917.91	26.5809
					236	0.236	7.8465e-07	3.01468e-06	5.35058e-05	0.000235014	0.000292319		292.319	3934.06	26.6356
					237	0.237	7.91084e-07	3.0394e-06	5.33397e-05	0.000233955	0.000291125		291.125	3950.2	26.6902
					238	0.238	7.97543e-07	3.06422e-06	5.31748e-05	0.000232904	0.000289941		289.941	3966.33	26.7446
					239	0.239	8.04027e-07	3.08912e-06	5.3011e-05	0.000231862	0.000288767		288.767	3982.46	26.7989
					240	0.24	8.10534e-07	3.11413e-06	5.28484e-05	0.000230829	0.000287602		287.602	3998.57	26.8531
					241	0.241	8.17066e-07	3.13922e-06	5.26868e-05	0.000229805	0.000286448		286.448	4014.69	26.9072
					242	0.242	8.23622e-07	3.16441e-06	5.25264e-05	0.000228789	0.000285304		285.304	4030.79	26.9611
					243	0.243	8.30203e-07	3.1897e-06	5.2367e-05	0.000227782	0.000284169		284.169	4046.89	27.0149
					244	0.244	8.36807e-07	3.21507e-06	5.22087e-05	0.000226783	0.000283043		283.043	4062.98	27.0685
					245	0.245	8.43437e-07	3.24054e-06	5.20515e-05	0.000225792	0.000281927		281.927	4079.07	27.1221
					246	0.246	8.5009e-07	3.2661e-06	5.18953e-05	0.000224809	0.00028082		280.82	4095.15	27.1755
					247	0.247	8.56767e-07	3.29176e-06	5.17402e-05	0.000223834	0.000279722		279.722	4111.22	27.2287
					248	0.248	8.63469e-07	3.31751e-06	5.15861e-05	0.000222867	0.000278634		278.634	4127.28	27.2819
					249	0.249	8.70195e-07	3.34335e-06	5.1433e-05	0.000221908	0.000277554		277.554	4143.34	27.3349
					250	0.25	8.76945e-07	3.36928e-06	5.12809e-05	0.000220956	0.000276483		276.483	4159.39	27.3878
					251	0.251	8.83719e-07	3.39531e-06	5.11298e-05	0.000220012	0.000275421		275.421	4175.43	27.4405
					252	0.252	8.90517e-07	3.42143e-06	5.09797e-05	0.000219076	0.000274367		274.367	4191.46	27.4932
					253	0.253	8.97339e-07	3.44764e-06	5.08306e-05	0.000218147	0.000273322		273.322	4207.49	27.5457
					254	0.254	9.04185e-07	3.47394e-06	5.06825e-05	0.000217225	0.000272286		272.286	4223.51	27.5981
					255	0.255	9.11055e-07	3.50034e-06	5.05353e-05	0.000216311	0.000271257		271.257	4239.52	27.6503
					256	0.256	9.1795e-07	3.52683e-06	5.0389e-05	0.000215403	0.000270237		270.237	4255.52	27.7025
					257	0.257	9.24868e-07	3.55341e-06	5.02437e-05	0.000214503	0.000269225		269.225	4271.52	27.7545
					258	0.258	9.3181e-07	3.58008e-06	5.00993e-05	0.00021361	0.000268221		268.221	4287.5	27.8064
					259	0.259	9.38776e-07	3.60684e-06	4.99559e-05	0.000212724	0.000267225		267.225	4303.48	27.8581
					260	0.26	9.45766e-07	3.6337e-06	4.98133e-05	0.000211845	0.000266237		266.237	4319.45	27.9098
					261	0.261	9.5278e-07	3.66065e-06	4.96716e-05	0.000210972	0.000265257		265.257	4335.42	27.9613
					262	0.262	9.59818e-07	3.68769e-06	4.95309e-05	0.000210106	0.000264285		264.285	4351.37	28.0127
					263	0.263	9.6688e-07	3.71482e-06	4.9391e-05	0.000209247	0.00026332		263.32	4367.32	28.064
					264	0.264	9.73966e-07	3.74204e-06	4.9252e-05	0.000208394	0.000262362		262.362	4383.25	28.1152
					265	0.265	9.81075e-07	3.76936e-06	4.91138e-05	0.000207548	0.000261412		261.412	4399.18	28.1662
					266	0.266	9.88208e-07	3.79676e-06	4.89765e-05	0.000206708	0.000260469		260.469	4415.11	28.2171
					267	0.267	9.95365e-07	3.82426e-06	4.884e-05	0.000205874	0.000259534		259.534	4431.02	28.2679
					268	0.268	1.00255e-06	3.85185e-06	4.87044e-05	0.000205047	0.000258606		258.606	4446.92	28.3186
					269	0.269	1.00975e-06	3.87953e-06	4.85696e-05	0.000204226	0.000257685		257.685	4462.82	28.3692
					270	0.27	1.01698e-06	3.9073e-06	4.84357e-05	0.000203411	0.000256771		256.771	4478.7	28.4196
					271	0.271	1.02423e-06	3.93516e-06	4.83025e-05	0.000202602	0.000255864		255.864	4494.58	28.47
					272	0.272	1.03151e-06	3.96311e-06	4.81702e-05	0.000201799	0.000254964		254.964	4510.45	28.5202
					273	0.273	1.0388e-06	3.99116e-06	4.80386e-05	0.000201002	0.00025407		254.07	4526.31	28.5703
					274	0.274	1.04613e-06	4.01929e-06	4.79079e-05	0.00020021	0.000253184		253.184	4542.16	28.6202
					275	0.275	1.05347e-06	4.04752e-06	4.77779e-05	0.000199425	0.000252304		252.304	4558	28.6701
					276	0.276	1.06084e-06	4.07583e-06	4.76487e-05	0.000198645	0.00025143		251.43	4573.83	28.7199
					277	0.277	1.06824e-06	4.10424e-06	4.75202e-05	0.000197871	0.000250564		250.564	4589.65	28.7695
					278	0.278	1.07565e-06	4.13274e-06	4.73926e-05	0.000197102	0.000249703		249.703	4605.47	28.819
					279	0.279	1.08309e-06	4.16132e-06	4.72656e-05	0.000196339	0.000248849		248.849	4621.27	28.8684
					280	0.28	1.09056e-06	4.19e-06	4.71394e-05	0.000195582	0.000248002		248.002	4637.06	28.9177
					281	0.281	1.09805e-06	4.21877e-06	4.7014e-05	0.00019483	0.000247161		247.161	4652.85	28.9669
					282	0.282	1.10556e-06	4.24762e-06	4.68893e-05	0.000194083	0.000246325		246.325	4668.62	29.0159
					283	0.283	1.11309e-06	4.27657e-06	4.67653e-05	0.000193341	0.000245496		245.496	4684.38	29.0649
					284	0.284	1.12065e-06	4.30561e-06	4.6642e-05	0.000192605	0.000244674		244.674	4700.14	29.1137
					285	0.285	1.12823e-06	4.33474e-06	4.65195e-05	0.000191874	0.000243857		243.857	4715.88	29.1624
					286	0.286	1.13583e-06	4.36395e-06	4.63976e-05	0.000191148	0.000243046		243.046	4731.62	29.211
					287	0.287	1.14346e-06	4.39326e-06	4.62765e-05	0.000190428	0.000242241		242.241	4747.34	29.2595
					288	0.288	1.15111e-06	4.42266e-06	4.6156e-05	0.000189712	0.000241442		241.442	4763.06	29.3079
					289	0.289	1.15879e-06	4.45214e-06	4.60363e-05	0.000189001	0.000240648		240.648	4778.76	29.3562
					290	0.29	1.16649e-06	4.48172e-06	4.59172e-05	0.000188295	0.00023986		239.86	4794.45	29.4044
					291	0.291	1.17421e-06	4.51138e-06	4.57987e-05	0.000187594	0.000239078		239.078	4810.14	29.4524
					292	0.292	1.18195e-06	4.54114e-06	4.5681e-05	0.000186898	0.000238302		238.302	4825.81	29.5004
					293	0.293	1.18972e-06	4.57098e-06	4.55639e-05	0.000186207	0.000237531		237.531	4841.47	29.5482
					294	0.294	1.19751e-06	4.60091e-06	4.54475e-05	0.00018552	0.000236766		236.766	4857.12	29.5959
					295	0.295	1.20532e-06	4.63093e-06	4.53317e-05	0.000184838	0.000236006		236.006	4872.76	29.6435
					296	0.296	1.21316e-06	4.66104e-06	4.52165e-05	0.000184161	0.000235251		235.251	4888.39	29.691
					297	0.297	1.22102e-06	4.69124e-06	4.5102e-05	0.000183488	0.000234502		234.502	4904.01	29.7384
					298	0.298	1.2289e-06	4.72153e-06	4.49881e-05	0.00018282	0.000233758		233.758	4919.62	29.7857
					299	0.299	1.23681e-06	4.75191e-06	4.48749e-05	0.000182156	0.000233019		233.019	4935.21	29.8329
					300	0.3	1.24474e-06	4.78237e-06	4.47622e-05	0.000181496	0.000232286		232.286	4950.8	29.8799
					301	0.301	1.25269e-06	4.81293e-06	4.46502e-05	0.000180842	0.000231557		231.557	4966.37	29.9269
					302	0.302	1.26067e-06	4.84357e-06	4.45388e-05	0.000180191	0.000230834		230.834	4981.93	29.9738
					303	0.303	1.26867e-06	4.8743e-06	4.4428e-05	0.000179545	0.000230116		230.116	4997.48	30.0205
					304	0.304	1.27669e-06	4.90512e-06	4.43178e-05	0.000178903	0.000229402		229.402	5013.02	30.0671
					305	0.305	1.28473e-06	4.93602e-06	4.42082e-05	0.000178265	0.000228694		228.694	5028.55	30.1137
					306	0.306	1.2928e-06	4.96702e-06	4.40992e-05	0.000177632	0.000227991		227.991	5044.07	30.1601
					307	0.307	1.30089e-06	4.9981e-06	4.39908e-05	0.000177002	0.000227292		227.292	5059.57	30.2064
					308	0.308	1.309e-06	5.02927e-06	4.38829e-05	0.000176377	0.000226598		226.598	5075.06	30.2526
					309	0.309	1.31714e-06	5.06053e-06	4.37756e-05	0.000175756	0.000225909		225.909	5090.54	30.2987
					310	0.31	1.3253e-06	5.09188e-06	4.36689e-05	0.000175139	0.000225225		225.225	5106.01	30.3447
					311	0.311	1.33348e-06	5.12332e-06	4.35628e-05	0.000174525	0.000224545		224.545	5121.47	30.3906
					312	0.312	1.34168e-06	5.15484e-06	4.34572e-05	0.000173916	0.00022387		223.87	5136.91	30.4364
					313	0.313	1.34991e-06	5.18645e-06	4.33521e-05	0.000173311	0.000223199		223.199	5152.34	30.4821
					314	0.314	1.35816e-06	5.21815e-06	4.32477e-05	0.000172709	0.000222533		222.533	5167.76	30.5277
					315	0.315	1.36643e-06	5.24993e-06	4.31437e-05	0.000172112	0.000221872		221.872	5183.17	30.5731
					316	0.316	1.37473e-06	5.28181e-06	4.30403e-05	0.000171518	0.000221215		221.215	5198.57	30.6185
					317	0.317	1.38305e-06	5.31377e-06	4.29375e-05	0.000170928	0.000220562		220.562	5213.95	30.6638
					318	0.318	1.39139e-06	5.34581e-06	4.28351e-05	0.000170342	0.000219914		219.914	5229.32	30.7089
					319	0.319	1.39975e-06	5.37795e-06	4.27333e-05	0.000169759	0.00021927		219.27	5244.67	30.754
					320	0.32	1.40814e-06	5.41017e-06	4.2632e-05	0.00016918	0.000218631		218.631	5260.02	30.7989
					321	0.321	1.41655e-06	5.44248e-06	4.25313e-05	0.000168605	0.000217995		217.995	5275.35	30.8438
					322	0.322	1.42498e-06	5.47487e-06	4.2431e-05	0.000168033	0.000217364		217.364	5290.66	30.8885
					323	0.323	1.43343e-06	5.50735e-06	4.23313e-05	0.000167465	0.000216737		216.737	5305.97	30.9332
					324	0.324	1.44191e-06	5.53992e-06	4.22321e-05	0.0001669	0.000216114		216.114	5321.26	30.9777
					325	0.325	1.45041e-06	5.57258e-06	4.21333e-05	0.000166339	0.000215496		215.496	5336.54	31.0222
					326	0.326	1.45893e-06	5.60532e-06	4.20351e-05	0.000165782	0.000214881		214.881	5351.8	31.0665
					327	0.327	1.46748e-06	5.63815e-06	4.19374e-05	0.000165227	0.00021427		214.27	5367.05	31.1107
					328	0.328	1.47604e-06	5.67106e-06	4.18401e-05	0.000164676	0.000213664		213.664	5382.29	31.1549
					329	0.329	1.48463e-06	5.70406e-06	4.17433e-05	0.000164129	0.000213061		213.061	5397.51	31.1989
					330	0.33	1.49325e-06	5.73715e-06	4.16471e-05	0.000163585	0.000212462		212.462	5412.72	31.2428
					331	0.331	1.50188e-06	5.77033e-06	4.15513e-05	0.000163044	0.000211868		211.868	5427.92	31.2866
					332	0.332	1.51054e-06	5.80359e-06	4.14559e-05	0.000162507	0.000211277		211.277	5443.1	31.3304
					333	0.333	1.51922e-06	5.83693e-06	4.13611e-05	0.000161972	0.000210689		210.689	5458.27	31.374
					334	0.334	1.52792e-06	5.87036e-06	4.12667e-05	0.000161441	0.000210106		210.106	5473.42	31.4175
					335	0.335	1.53664e-06	5.90388e-06	4.11728e-05	0.000160913	0.000209527		209.527	5488.57	31.4609
					336	0.336	1.54539e-06	5.93748e-06	4.10793e-05	0.000160389	0.000208951		208.951	5503.69	31.5043
					337	0.337	1.55416e-06	5.97117e-06	4.09863e-05	0.000159867	0.000208379		208.379	5518.8	31.5475
					338	0.338	1.56295e-06	6.00495e-06	4.08937e-05	0.000159348	0.00020781		207.81	5533.9	31.5906
					339	0.339	1.57176e-06	6.03881e-06	4.08016e-05	0.000158833	0.000207245		207.245	5548.98	31.6336
					340	0.34	1.5806e-06	6.07276e-06	4.071e-05	0.000158321	0.000206684		206.684	5564.05	31.6765
					341	0.341	1.58945e-06	6.10679e-06	4.06187e-05	0.000157811	0.000206126		206.126	5579.1	31.7194
					342	0.342	1.59833e-06	6.1409e-06	4.05279e-05	0.000157305	0.000205572		205.572	5594.14	31.7621
					343	0.343	1.60723e-06	6.17511e-06	4.04376e-05	0.000156802	0.000205022		205.022	5609.17	31.8047
					344	0.344	1.61616e-06	6.20939e-06	4.03477e-05	0.000156301	0.000204474		204.474	5624.17	31.8472
					345	0.345	1.62511e-06	6.24376e-06	4.02582e-05	0.000155804	0.000203931		203.931	5639.17	31.8897
					346	0.346	1.63407e-06	6.27822e-06	4.01691e-05	0.000155309	0.000203391		203.391	5654.15	31.932
					347	0.347	1.64306e-06	6.31276e-06	4.00805e-05	0.000154817	0.000202854		202.854	5669.11	31.9742
					348	0.348	1.65208e-06	6.34739e-06	3.99923e-05	0.000154329	0.00020232		202.32	5684.06	32.0163
					349	0.349	1.66111e-06	6.3821e-06	3.99044e-05	0.000153842	0.00020179		201.79	5698.99	32.0584
					350	0.35	1.67017e-06	6.4169e-06	3.9817e-05	0.000153359	0.000201263		201.263	5713.91	32.1003
					351	0.351	1.67925e-06	6.45178e-06	3.97301e-05	0.000152879	0.00020074		200.74	5728.81	32.1421
					352	0.352	1.68835e-06	6.48675e-06	3.96435e-05	0.000152401	0.000200219		200.219	5743.7	32.1839
					353	0.353	1.69747e-06	6.5218e-06	3.95573e-05	0.000151926	0.000199702		199.702	5758.57	32.2255
					354	0.354	1.70662e-06	6.55693e-06	3.94715e-05	0.000151454	0.000199189		199.189	5773.42	32.267
					355	0.355	1.71578e-06	6.59215e-06	3.93861e-05	0.000150984	0.000198678		198.678	5788.26	32.3085
					356	0.356	1.72497e-06	6.62745e-06	3.93012e-05	0.000150517	0.000198171		198.171	5803.08	32.3498
					357	0.357	1.73418e-06	6.66284e-06	3.92166e-05	0.000150053	0.000197666		197.666	5817.89	32.3911
					358	0.358	1.74341e-06	6.69831e-06	3.91324e-05	0.000149591	0.000197165		197.165	5832.68	32.4322
					359	0.359	1.75267e-06	6.73387e-06	3.90485e-05	0.000149132	0.000196667		196.667	5847.45	32.4732
					360	0.36	1.76194e-06	6.76951e-06	3.89651e-05	0.000148675	0.000196172		196.172	5862.21	32.5142
					361	0.361	1.77124e-06	6.80523e-06	3.8882e-05	0.000148221	0.00019568		195.68	5876.95	32.5551
					362	0.362	1.78056e-06	6.84104e-06	3.87994e-05	0.00014777	0.000195191		195.191	5891.68	32.5958
					363	0.363	1.7899e-06	6.87693e-06	3.8717e-05	0.000147321	0.000194704		194.704	5906.39	32.6365
					364	0.364	1.79927e-06	6.91291e-06	3.86351e-05	0.000146874	0.000194221		194.221	5921.08	32.677
					365	0.365	1.80865e-06	6.94896e-06	3.85535e-05	0.00014643	0.000193741		193.741	5935.75	32.7175
					366	0.366	1.81806e-06	6.98511e-06	3.84723e-05	0.000145988	0.000193264		193.264	5950.41	32.7579
					367	0.367	1.82749e-06	7.02133e-06	3.83915e-05	0.000145549	0.00019279		192.79	5965.05	32.7982
					368	0.368	1.83694e-06	7.05764e-06	3.8311e-05	0.000145112	0.000192318		192.318	5979.68	32.8383
					369	0.369	1.84641e-06	7.09403e-06	3.82309e-05	0.000144678	0.000191849		191.849	5994.29	32.8784
					370	0.37	1.8559e-06	7.13051e-06	3.81512e-05	0.000144246	0.000191384		191.384	6008.88	32.9184
					371	0.371	1.86542e-06	7.16706e-06	3.80717e-05	0.000143816	0.000190921		190.921	6023.45	32.9583
					372	0.372	1.87496e-06	7.20371e-06	3.79927e-05	0.000143389	0.00019046		190.46	6038	32.9981
					373	0.373	1.88451e-06	7.24043e-06	3.7914e-05	0.000142964	0.000190003		190.003	6052.54	33.0378
					374	0.374	1.89409e-06	7.27724e-06	3.78356e-05	0.000142541	0.000189548		189.548	6067.06	33.0774
					375	0.375	1.9037e-06	7.31413e-06	3.77576e-05	0.000142121	0.000189096		189.096	6081.56	33.1169
					376	0.376	1.91332e-06	7.3511e-06	3.76799e-05	0.000141702	0.000188647		188.647	6096.05	33.1563
					377	0.377	1.92296e-06	7.38815e-06	3.76026e-05	0.000141286	0.0001882		188.2	6110.52	33.1957
					378	0.378	1.93263e-06	7.42529e-06	3.75256e-05	0.000140873	0.000187756		187.756	6124.97	33.2349
					379	0.379	1.94232e-06	7.46251e-06	3.74489e-05	0.000140461	0.000187315		187.315	6139.4	33.274
					380	0.38	1.95203e-06	7.49982e-06	3.73726e-05	0.000140052	0.000186876		186.876	6153.81	33.313
					381	0.381	1.96176e-06	7.5372e-06	3.72966e-05	0.000139644	0.00018644		186.44	6168.2	33.352
					382	0.382	1.97151e-06	7.57467e-06	3.72209e-05	0.000139239	0.000186006		186.006	6182.58	33.3908
					383	0.383	1.98128e-06	7.61222e-06	3.71455e-05	0.000138836	0.000185575		185.575	6196.94	33.4296
					384	0.384	1.99108e-06	7.64985e-06	3.70705e-05	0.000138436	0.000185147		185.147	6211.28	33.4682
					385	0.385	2.00089e-06	7.68756e-06	3.69958e-05	0.000138037	0.000184721		184.721	6225.6	33.5068
					386	0.386	2.01073e-06	7.72536e-06	3.69214e-05	0.00013764	0.000184298		184.298	6239.9	33.5453
					387	0.387	2.02059e-06	7.76324e-06	3.68473e-05	0.000137246	0.000183877		183.877	6254.19	33.5836
					388	0.388	2.03047e-06	7.8012e-06	3.67735e-05	0.000136853	0.000183458		183.458	6268.45	33.6219
					389	0.389	2.04037e-06	7.83924e-06	3.67001e-05	0.000136463	0.000183042		183.042	6282.7	33.6601
					390	0.39	2.05029e-06	7.87736e-06	3.66269e-05	0.000136074	0.000182629		182.629	6296.93	33.6982
					391	0.391	2.06024e-06	7.91557e-06	3.65541e-05	0.000135688	0.000182218		182.218	6311.14	33.7362
					392	0.392	2.0702e-06	7.95385e-06	3.64816e-05	0.000135303	0.000181809		181.809	6325.33	33.7741
					393	0.393	2.08019e-06	7.99222e-06	3.64093e-05	0.000134921	0.000181402		181.402	6339.5	33.8119
					394	0.394	2.0902e-06	8.03067e-06	3.63374e-05	0.00013454	0.000180998		180.998	6353.65	33.8496
					395	0.395	2.10022e-06	8.0692e-06	3.62658e-05	0.000134162	0.000180597		180.597	6367.78	33.8872
					396	0.396	2.11027e-06	8.10781e-06	3.61944e-05	0.000133785	0.000180197		180.197	6381.89	33.9248
					397	0.397	2.12034e-06	8.14651e-06	3.61234e-05	0.00013341	0.0001798		179.8	6395.98	33.9622
					398	0.398	2.13044e-06	8.18528e-06	3.60527e-05	0.000133037	0.000179406		179.406	6410.06	33.9996
					399	0.399	2.14055e-06	8.22414e-06	3.59822e-05	0.000132666	0.000179013		179.013	6424.11	34.0368
					400	0.4	2.15068e-06	8.26307e-06	3.59121e-05	0.000132297	0.000178623		178.623	6438.14	34.074
					401	0.401	2.16084e-06	8.30209e-06	3.58422e-05	0.00013193	0.000178235		178.235	6452.16	34.111
					402	0.402	2.17102e-06	8.34119e-06	3.57726e-05	0.000131564	0.000177849		177.849	6466.15	34.148
					403	0.403	2.18121e-06	8.38037e-06	3.57033e-05	0.000131201	0.000177466		177.466	6480.13	34.1849
					404	0.404	2.19143e-06	8.41963e-06	3.56343e-05	0.000130839	0.000177084		177.084	6494.08	34.2217
					405	0.405	2.20167e-06	8.45897e-06	3.55655e-05	0.000130479	0.000176705		176.705	6508.01	34.2584
					406	0.406	2.21193e-06	8.49839e-06	3.54971e-05	0.000130121	0.000176328		176.328	6521.93	34.295
					407	0.407	2.22221e-06	8.53789e-06	3.54289e-05	0.000129764	0.000175953		175.953	6535.82	34.3315
					408	0.408	2.23251e-06	8.57747e-06	3.5361e-05	0.00012941	0.000175581		175.581	6549.69	34.3679
					409	0.409	2.24284e-06	8.61713e-06	3.52933e-05	0.000129057	0.00017521		175.21	6563.54	34.4042
					410	0.41	2.25318e-06	8.65687e-06	3.5226e-05	0.000128706	0.000174842		174.842	6577.37	34.4404
					411	0.411	2.26355e-06	8.6967e-06	3.51589e-05	0.000128356	0.000174475		174.475	6591.18	34.4766
					412	0.412	2.27393e-06	8.7366e-06	3.5092e-05	0.000128009	0.000174111		174.111	6604.97	34.5126
					413	0.413	2.28434e-06	8.77658e-06	3.50255e-05	0.000127663	0.000173749		173.749	6618.74	34.5486
					414	0.414	2.29476e-06	8.81664e-06	3.49592e-05	0.000127318	0.000173389		173.389	6632.49	34.5844
					415	0.415	2.30521e-06	8.85678e-06	3.48931e-05	0.000126976	0.000173031		173.031	6646.22	34.6202
					416	0.416	2.31568e-06	8.89701e-06	3.48273e-05	0.000126635	0.000172675		172.675	6659.92	34.6559
					417	0.417	2.32617e-06	8.93731e-06	3.47618e-05	0.000126295	0.000172321		172.321	6673.61	34.6915
					418	0.418	2.33668e-06	8.97769e-06	3.46966e-05	0.000125958	0.000171969		171.969	6687.27	34.727
					419	0.419	2.34721e-06	9.01815e-06	3.46316e-05	0.000125622	0.000171618		171.618	6700.91	34.7624
					420	0.42	2.35776e-06	9.05869e-06	3.45668e-05	0.000125287	0.00017127		171.27	6714.53	34.7977
					421	0.421	2.36834e-06	9.09931e-06	3.45023e-05	0.000124954	0.000170924		170.924	6728.13	34.8329
					422	0.422	2.37893e-06	9.14001e-06	3.44381e-05	0.000124623	0.00017058		170.58	6741.71	34.868
					423	0.423	2.38954e-06	9.18079e-06	3.43741e-05	0.000124293	0.000170238		170.238	6755.26	34.9031
					424	0.424	2.40018e-06	9.22165e-06	3.43103e-05	0.000123965	0.000169897		169.897	6768.8	34.938
					425	0.425	2.41083e-06	9.26258e-06	3.42468e-05	0.000123639	0.000169559		169.559	6782.31	34.9729
					426	0.426	2.42151e-06	9.3036e-06	3.41836e-05	0.000123314	0.000169222		169.222	6795.8	35.0076
					427	0.427	2.4322e-06	9.34469e-06	3.41205e-05	0.00012299	0.000168888		168.888	6809.27	35.0423
					428	0.428	2.44292e-06	9.38587e-06	3.40578e-05	0.000122668	0.000168555		168.555	6822.71	35.0769
					429	0.429	2.45366e-06	9.42712e-06	3.39952e-05	0.000122348	0.000168224		168.224	6836.14	35.1114
					430	0.43	2.46442e-06	9.46845e-06	3.3933e-05	0.000122029	0.000167895		167.895	6849.54	35.1458
					431	0.431	2.47519e-06	9.50986e-06	3.38709e-05	0.000121711	0.000167567		167.567	6862.92	35.1801
					432	0.432	2.48599e-06	9.55135e-06	3.38091e-05	0.000121395	0.000167242		167.242	6876.27	35.2143
					433	0.433	2.49681e-06	9.59292e-06	3.37475e-05	0.000121081	0.000166918		166.918	6889.61	35.2484
					434	0.434	2.50765e-06	9.63456e-06	3.36861e-05	0.000120768	0.000166596		166.596	6902.92	35.2824
					435	0.435	2.51851e-06	9.67629e-06	3.3625e-05	0.000120456	0.000166276		166.276	6916.2	35.3164
					436	0.436	2.52939e-06	9.71809e-06	3.35641e-05	0.000120146	0.000165958		165.958	6929.47	35.3502
					437	0.437	2.54029e-06	9.75997e-06	3.35035e-05	0.000119838	0.000165641		165.641	6942.71	35.384
					438	0.438	2.55121e-06	9.80193e-06	3.34431e-05	0.00011953	0.000165326		165.326	6955.93	35.4177
					439	0.439	2.56215e-06	9.84397e-06	3.33829e-05	0.000119224	0.000165013		165.013	6969.13	35.4513
					440	0.44	2.57312e-06	9.88608e-06	3.33229e-05	0.00011892	0.000164702		164.702	6982.3	35.4847
					441	0.441	2.5841e-06	9.92828e-06	3.32631e-05	0.000118617	0.000164392		164.392	6995.46	35.5181
					442	0.442	2.5951e-06	9.97055e-06	3.32036e-05	0.000118315	0.000164085		164.085	7008.58	35.5515
					443	0.443	2.60612e-06	1.00129e-05	3.31443e-05	0.000118015	0.000163778		163.778	7021.69	35.5847
					444	0.444	2.61716e-06	1.00553e-05	3.30852e-05	0.000117716	0.000163474		163.474	7034.77	35.6178
					445	0.445	2.62823e-06	1.00978e-05	3.30263e-05	0.000117419	0.000163171		163.171	7047.83	35.6508
					446	0.446	2.63931e-06	1.01404e-05	3.29676e-05	0.000117122	0.00016287		162.87	7060.86	35.6838
					447	0.447	2.65041e-06	1.01831e-05	3.29092e-05	0.000116827	0.00016257		162.57	7073.87	35.7167
					448	0.448	2.66154e-06	1.02258e-05	3.2851e-05	0.000116534	0.000162272		162.272	7086.86	35.7494
					449	0.449	2.67268e-06	1.02686e-05	3.2793e-05	0.000116242	0.000161976		161.976	7099.82	35.7821
					450	0.45	2.68385e-06	1.03115e-05	3.27352e-05	0.000115951	0.000161681		161.681	7112.76	35.8147
					451	0.451	2.69503e-06	1.03545e-05	3.26776e-05	0.000115661	0.000161388		161.388	7125.67	35.8472
					452	0.452	2.70623e-06	1.03975e-05	3.26202e-05	0.000115373	0.000161097		161.097	7138.56	35.8796
					453	0.453	2.71746e-06	1.04407e-05	3.2563e-05	0.000115086	0.000160807		160.807	7151.43	35.9119
					454	0.454	2.7287e-06	1.04839e-05	3.25061e-05	0.0001148	0.000160519		160.519	7164.27	35.9442
					455	0.455	2.73997e-06	1.05271e-05	3.24493e-05	0.000114516	0.000160232		160.232	7177.09	35.9763
					456	0.456	2.75125e-06	1.05705e-05	3.23927e-05	0.000114232	0.000159947		159.947	7189.89	36.0084
					457	0.457	2.76256e-06	1.06139e-05	3.23364e-05	0.00011395	0.000159663		159.663	7202.66	36.0403
					458	0.458	2.77388e-06	1.06574e-05	3.22802e-05	0.00011367	0.000159381		159.381	7215.4	36.0722
					459	0.459	2.78522e-06	1.0701e-05	3.22243e-05	0.00011339	0.000159101		159.101	7228.12	36.104
					460	0.46	2.79659e-06	1.07447e-05	3.21685e-05	0.000113112	0.000158822		158.822	7240.82	36.1357
					461	0.461	2.80797e-06	1.07884e-05	3.2113e-05	0.000112835	0.000158544		158.544	7253.49	36.1673
					462	0.462	2.81938e-06	1.08322e-05	3.20576e-05	0.000112559	0.000158268		158.268	7266.14	36.1988
					463	0.463	2.8308e-06	1.08761e-05	3.20025e-05	0.000112285	0.000157994		157.994	7278.76	36.2302
					464	0.464	2.84224e-06	1.09201e-05	3.19475e-05	0.000112011	0.000157721		157.721	7291.36	36.2616
					465	0.465	2.85371e-06	1.09641e-05	3.18928e-05	0.000111739	0.00015745		157.45	7303.93	36.2928
					466	0.466	2.86519e-06	1.10083e-05	3.18382e-05	0.000111468	0.00015718		157.18	7316.48	36.324
					467	0.467	2.8767e-06	1.10525e-05	3.17838e-05	0.000111198	0.000156911		156.911	7329	36.355
					468	0.468	2.88822e-06	1.10967e-05	3.17296e-05	0.000110929	0.000156644		156.644	7341.49	36.386
					469	0.469	2.89976e-06	1.11411e-05	3.16756e-05	0.000110662	0.000156378		156.378	7353.97	36.4169
					470	0.47	2.91132e-06	1.11855e-05	3.16218e-05	0.000110395	0.000156114		156.114	7366.41	36.4477
					471	0.471	2.92291e-06	1.123e-05	3.15682e-05	0.00011013	0.000155851		155.851	7378.83	36.4784
					472	0.472	2.93451e-06	1.12746e-05	3.15148e-05	0.000109866	0.00015559		155.59	7391.23	36.5091
					473	0.473	2.94613e-06	1.13192e-05	3.14615e-05	0.000109603	0.00015533		155.33	7403.6	36.5396
					474	0.474	2.95777e-06	1.1364e-05	3.14084e-05	0.000109341	0.000155071		155.071	7415.94	36.57
					475	0.475	2.96944e-06	1.14088e-05	3.13556e-05	0.00010908	0.000154814		154.814	7428.26	36.6004
					476	0.476	2.98112e-06	1.14537e-05	3.13029e-05	0.000108821	0.000154558		154.558	7440.55	36.6307
					477	0.477	2.99282e-06	1.14986e-05	3.12503e-05	0.000108562	0.000154304		154.304	7452.82	36.6609
					478	0.478	3.00454e-06	1.15436e-05	3.1198e-05	0.000108305	0.000154051		154.051	7465.06	36.691
					479	0.479	3.01628e-06	1.15887e-05	3.11459e-05	0.000108048	0.000153799		153.799	7477.28	36.721
					480	0.48	3.02804e-06	1.16339e-05	3.10939e-05	0.000107793	0.000153549		153.549	7489.47	36.7509
					481	0.481	3.03982e-06	1.16792e-05	3.10421e-05	0.000107539	0.0001533		153.3	7501.63	36.7807
					482	0.482	3.05162e-06	1.17245e-05	3.09905e-05	0.000107286	0.000153052		153.052	7513.77	36.8104
					483	0.483	3.06343e-06	1.17699e-05	3.0939e-05	0.000107034	0.000152806		152.806	7525.88	36.8401
					484	0.484	3.07527e-06	1.18154e-05	3.08877e-05	0.000106783	0.000152561		152.561	7537.96	36.8697
					485	0.485	3.08713e-06	1.1861e-05	3.08366e-05	0.000106533	0.000152317		152.317	7550.02	36.8991
					486	0.486	3.09901e-06	1.19066e-05	3.07857e-05	0.000106284	0.000152075		152.075	7562.05	36.9285
					487	0.487	3.1109e-06	1.19523e-05	3.0735e-05	0.000106036	0.000151834		151.834	7574.06	36.9578
					488	0.488	3.12282e-06	1.19981e-05	3.06844e-05	0.000105789	0.000151594		151.594	7586.03	36.987
					489	0.489	3.13475e-06	1.20439e-05	3.0634e-05	0.000105543	0.000151356		151.356	7597.99	37.0162
					490	0.49	3.14671e-06	1.20899e-05	3.05837e-05	0.000105298	0.000151119		151.119	7609.91	37.0452
					491	0.491	3.15868e-06	1.21359e-05	3.05337e-05	0.000105055	0.000150883		150.883	7621.81	37.0742
					492	0.492	3.17067e-06	1.21819e-05	3.04838e-05	0.000104812	0.000150648		150.648	7633.68	37.103
					493	0.493	3.18269e-06	1.22281e-05	3.0434e-05	0.00010457	0.000150415		150.415	7645.53	37.1318
					494	0.494	3.19472e-06	1.22743e-05	3.03844e-05	0.000104329	0.000150183		150.183	7657.34	37.1605
					495	0.495	3.20677e-06	1.23206e-05	3.0335e-05	0.000104089	0.000149952		149.952	7669.13	37.1891
					496	0.496	3.21884e-06	1.2367e-05	3.02858e-05	0.00010385	0.000149722		149.722	7680.9	37.2176
					497	0.497	3.23093e-06	1.24135e-05	3.02367e-05	0.000103613	0.000149494		149.494	7692.63	37.246
					498	0.498	3.24304e-06	1.246e-05	3.01878e-05	0.000103376	0.000149266		149.266	7704.34	37.2744
					499	0.499	3.25517e-06	1.25066e-05	3.0139e-05	0.00010314	0.00014904		149.04	7716.03	37.3026
					500	0.5	3.26732e-06	1.25533e-05	3.00904e-05	0.000102905	0.000148816		148.816	7727.68	37.3308
					501	0.501	3.27948e-06	1.26e-05	3.0042e-05	0.000102671	0.000148592		148.592	7739.31	37.3588
					502	0.502	3.29167e-06	1.26468e-05	2.99937e-05	0.000102438	0.00014837		148.37	7750.91	37.3868
					503	0.503	3.30388e-06	1.26937e-05	2.99456e-05	0.000102205	0.000148149		148.149	7762.48	37.4147
					504	0.504	3.3161e-06	1.27407e-05	2.98976e-05	0.000101974	0.000147929		147.929	7774.03	37.4425
					505	0.505	3.32835e-06	1.27877e-05	2.98498e-05	0.000101744	0.00014771		147.71	7785.54	37.4703
					506	0.506	3.34061e-06	1.28348e-05	2.98022e-05	0.000101514	0.000147492		147.492	7797.03	37.4979
					507	0.507	3.35289e-06	1.2882e-05	2.97547e-05	0.000101286	0.000147276		147.276	7808.49	37.5255
					508	0.508	3.36519e-06	1.29293e-05	2.97073e-05	0.000101058	0.00014706		147.06	7819.93	37.5529
					509	0.509	3.37751e-06	1.29766e-05	2.96601e-05	0.000100832	0.000146846		146.846	7831.33	37.5803
					510	0.51	3.38985e-06	1.3024e-05	2.96131e-05	0.000100606	0.000146633		146.633	7842.71	37.6076
					511	0.511	3.40221e-06	1.30715e-05	2.95662e-05	0.000100381	0.000146421		146.421	7854.06	37.6348
					512	0.512	3.41459e-06	1.31191e-05	2.95195e-05	0.000100157	0.00014621		146.21	7865.38	37.6619
					513	0.513	3.42698e-06	1.31667e-05	2.94729e-05	9.99341e-05	0.000146001		146.001	7876.68	37.6889
					514	0.514	3.4394e-06	1.32144e-05	2.94264e-05	9.97119e-05	0.000145792		145.792	7887.94	37.7159
					515	0.515	3.45183e-06	1.32622e-05	2.93802e-05	9.94905e-05	0.000145585		145.585	7899.18	37.7427
					516	0.516	3.46429e-06	1.331e-05	2.9334e-05	9.92701e-05	0.000145378		145.378	7910.39	37.7695
					517	0.517	3.47676e-06	1.33579e-05	2.9288e-05	9.90505e-05	0.000145173		145.173	7921.57	37.7962
					518	0.518	3.48925e-06	1.34059e-05	2.92422e-05	9.88317e-05	0.000144969		144.969	7932.72	37.8228
					519	0.519	3.50176e-06	1.3454e-05	2.91965e-05	9.86139e-05	0.000144766		144.766	7943.85	37.8493
					520	0.52	3.51429e-06	1.35021e-05	2.91509e-05	9.83968e-05	0.000144564		144.564	7954.94	37.8757
					521	0.521	3.52684e-06	1.35503e-05	2.91055e-05	9.81806e-05	0.000144363		144.363	7966.01	37.9021
					522	0.522	3.5394e-06	1.35986e-05	2.90602e-05	9.79653e-05	0.000144164		144.164	7977.05	37.9283
					523	0.523	3.55199e-06	1.3647e-05	2.90151e-05	9.77508e-05	0.000143965		143.965	7988.06	37.9545
					524	0.524	3.56459e-06	1.36954e-05	2.89701e-05	9.75371e-05	0.000143767		143.767	7999.04	37.9805
					525	0.525	3.57722e-06	1.37439e-05	2.89253e-05	9.73242e-05	0.000143571		143.571	8009.99	38.0065
					526	0.526	3.58986e-06	1.37925e-05	2.88806e-05	9.71122e-05	0.000143375		143.375	8020.92	38.0324
					527	0.527	3.60252e-06	1.38411e-05	2.8836e-05	9.6901e-05	0.000143181		143.181	8031.81	38.0583
					528	0.528	3.6152e-06	1.38898e-05	2.87916e-05	9.66906e-05	0.000142987		142.987	8042.68	38.084
					529	0.529	3.6279e-06	1.39386e-05	2.87473e-05	9.6481e-05	0.000142795		142.795	8053.51	38.1097
					530	0.53	3.64062e-06	1.39875e-05	2.87031e-05	9.62722e-05	0.000142603		142.603	8064.32	38.1352
					531	0.531	3.65335e-06	1.40364e-05	2.86591e-05	9.60642e-05	0.000142413		142.413	8075.1	38.1607
					532	0.532	3.66611e-06	1.40854e-05	2.86153e-05	9.5857e-05	0.000142224		142.224	8085.85	38.1861
					533	0.533	3.67888e-06	1.41345e-05	2.85715e-05	9.56506e-05	0.000142035		142.035	8096.57	38.2114
					534	0.534	3.69167e-06	1.41836e-05	2.85279e-05	9.54449e-05	0.000141848		141.848	8107.26	38.2366
					535	0.535	3.70448e-06	1.42329e-05	2.84844e-05	9.52401e-05	0.000141662		141.662	8117.92	38.2617
					536	0.536	3.71731e-06	1.42822e-05	2.84411e-05	9.5036e-05	0.000141477		141.477	8128.56	38.2868
					537	0.537	3.73016e-06	1.43315e-05	2.83979e-05	9.48327e-05	0.000141292		141.292	8139.16	38.3118
					538	0.538	3.74302e-06	1.4381e-05	2.83548e-05	9.46301e-05	0.000141109		141.109	8149.73	38.3366
					539	0.539	3.75591e-06	1.44305e-05	2.83119e-05	9.44283e-05	0.000140927		140.927	8160.28	38.3614
					540	0.54	3.76881e-06	1.448e-05	2.82691e-05	9.42273e-05	0.000140745		140.745	8170.79	38.3861
					541	0.541	3.78173e-06	1.45297e-05	2.82264e-05	9.4027e-05	0.000140565		140.565	8181.28	38.4108
					542	0.542	3.79467e-06	1.45794e-05	2.81838e-05	9.38275e-05	0.000140385		140.385	8191.73	38.4353
					543	0.543	3.80763e-06	1.46292e-05	2.81414e-05	9.36288e-05	0.000140207		140.207	8202.16	38.4597
					544	0.544	3.82061e-06	1.4679e-05	2.80991e-05	9.34307e-05	0.000140029		140.029	8212.56	38.4841
					545	0.545	3.83361e-06	1.4729e-05	2.8057e-05	9.32334e-05	0.000139853		139.853	8222.92	38.5084
					546	0.546	3.84662e-06	1.4779e-05	2.80149e-05	9.30369e-05	0.000139677		139.677	8233.26	38.5326
					547	0.547	3.85965e-06	1.48291e-05	2.7973e-05	9.2841e-05	0.000139503		139.503	8243.57	38.5567
					548	0.548	3.8727e-06	1.48792e-05	2.79312e-05	9.26459e-05	0.000139329		139.329	8253.84	38.5807
					549	0.549	3.88577e-06	1.49294e-05	2.78896e-05	9.24515e-05	0.000139156		139.156	8264.09	38.6047
					550	0.55	3.89886e-06	1.49797e-05	2.7848e-05	9.22579e-05	0.000138984		138.984	8274.31	38.6285
					551	0.551	3.91197e-06	1.503e-05	2.78066e-05	9.20649e-05	0.000138814		138.814	8284.49	38.6523
					552	0.552	3.92509e-06	1.50805e-05	2.77653e-05	9.18727e-05	0.000138644		138.644	8294.65	38.676
					553	0.553	3.93824e-06	1.5131e-05	2.77242e-05	9.16811e-05	0.000138475		138.475	8304.78	38.6996
					554	0.554	3.9514e-06	1.51815e-05	2.76831e-05	9.14903e-05	0.000138306		138.306	8314.87	38.7231
					555	0.555	3.96458e-06	1.52322e-05	2.76422e-05	9.13002e-05	0.000138139		138.139	8324.94	38.7465
					556	0.556	3.97778e-06	1.52829e-05	2.76014e-05	9.11107e-05	0.000137973		137.973	8334.98	38.7699
					557	0.557	3.99099e-06	1.53337e-05	2.75607e-05	9.0922e-05	0.000137807		137.807	8344.98	38.7931
					558	0.558	4.00423e-06	1.53845e-05	2.75202e-05	9.07339e-05	0.000137643		137.643	8354.96	38.8163
					559	0.559	4.01748e-06	1.54354e-05	2.74797e-05	9.05465e-05	0.000137479		137.479	8364.9	38.8394
					560	0.56	4.03075e-06	1.54864e-05	2.74394e-05	9.03598e-05	0.000137316		137.316	8374.82	38.8624
					561	0.561	4.04404e-06	1.55375e-05	2.73992e-05	9.01738e-05	0.000137155		137.155	8384.7	38.8854
					562	0.562	4.05735e-06	1.55886e-05	2.73591e-05	8.99884e-05	0.000136994		136.994	8394.56	38.9082
					563	0.563	4.07067e-06	1.56398e-05	2.73192e-05	8.98038e-05	0.000136833		136.833	8404.38	38.931
					564	0.564	4.08401e-06	1.56911e-05	2.72793e-05	8.96197e-05	0.000136674		136.674	8414.17	38.9536
					565	0.565	4.09738e-06	1.57424e-05	2.72396e-05	8.94364e-05	0.000136516		136.516	8423.94	38.9762
					566	0.566	4.11076e-06	1.57938e-05	2.72e-05	8.92537e-05	0.000136358		136.358	8433.67	38.9987
					567	0.567	4.12415e-06	1.58453e-05	2.71605e-05	8.90716e-05	0.000136202		136.202	8443.37	39.0212
					568	0.568	4.13757e-06	1.58968e-05	2.71211e-05	8.88902e-05	0.000136046		136.046	8453.04	39.0435
					569	0.569	4.151e-06	1.59484e-05	2.70818e-05	8.87095e-05	0.000135891		135.891	8462.68	39.0658
					570	0.57	4.16446e-06	1.60001e-05	2.70426e-05	8.85294e-05	0.000135737		135.737	8472.29	39.0879
					571	0.571	4.17793e-06	1.60519e-05	2.70036e-05	8.83499e-05	0.000135583		135.583	8481.87	39.11
					572	0.572	4.19142e-06	1.61037e-05	2.69647e-05	8.81711e-05	0.000135431		135.431	8491.42	39.132
					573	0.573	4.20492e-06	1.61556e-05	2.69258e-05	8.79929e-05	0.000135279		135.279	8500.93	39.1539
					574	0.574	4.21845e-06	1.62076e-05	2.68871e-05	8.78154e-05	0.000135128		135.128	8510.42	39.1758
					575	0.575	4.23199e-06	1.62596e-05	2.68485e-05	8.76384e-05	0.000134979		134.979	8519.87	39.1975
					576	0.576	4.24555e-06	1.63117e-05	2.681e-05	8.74621e-05	0.000134829		134.829	8529.3	39.2192
					577	0.577	4.25913e-06	1.63639e-05	2.67717e-05	8.72864e-05	0.000134681		134.681	8538.69	39.2408
					578	0.578	4.27272e-06	1.64161e-05	2.67334e-05	8.71114e-05	0.000134534		134.534	8548.05	39.2623
					579	0.579	4.28634e-06	1.64684e-05	2.66952e-05	8.69369e-05	0.000134387		134.387	8557.38	39.2837
					580	0.58	4.29997e-06	1.65208e-05	2.66572e-05	8.67631e-05	0.000134241		134.241	8566.68	39.3051
					581	0.581	4.31362e-06	1.65732e-05	2.66192e-05	8.65898e-05	0.000134096		134.096	8575.95	39.3263
					582	0.582	4.32729e-06	1.66257e-05	2.65814e-05	8.64172e-05	0.000133952		133.952	8585.19	39.3475
					583	0.583	4.34097e-06	1.66783e-05	2.65437e-05	8.62452e-05	0.000133808		133.808	8594.4	39.3686
					584	0.584	4.35467e-06	1.6731e-05	2.6506e-05	8.60738e-05	0.000133665		133.665	8603.57	39.3896
					585	0.585	4.36839e-06	1.67837e-05	2.64685e-05	8.59029e-05	0.000133524		133.524	8612.71	39.4105
					586	0.586	4.38213e-06	1.68365e-05	2.64311e-05	8.57327e-05	0.000133382		133.382	8621.83	39.4314
					587	0.587	4.39589e-06	1.68893e-05	2.63938e-05	8.5563e-05	0.000133242		133.242	8630.91	39.4521
					588	0.588	4.40966e-06	1.69422e-05	2.63566e-05	8.5394e-05	0.000133102		133.102	8639.96	39.4728
					589	0.589	4.42346e-06	1.69952e-05	2.63195e-05	8.52255e-05	0.000132964		132.964	8648.98	39.4934
					590	0.59	4.43727e-06	1.70483e-05	2.62825e-05	8.50576e-05	0.000132826		132.826	8657.97	39.5139
					591	0.591	4.45109e-06	1.71014e-05	2.62456e-05	8.48903e-05	0.000132688		132.688	8666.92	39.5344
					592	0.592	4.46494e-06	1.71546e-05	2.62088e-05	8.47235e-05	0.000132552		132.552	8675.85	39.5547
					593	0.593	4.4788e-06	1.72079e-05	2.61722e-05	8.45574e-05	0.000132416		132.416	8684.74	39.575
					594	0.594	4.49268e-06	1.72612e-05	2.61356e-05	8.43918e-05	0.000132281		132.281	8693.6	39.5952
					595	0.595	4.50658e-06	1.73146e-05	2.60991e-05	8.42267e-05	0.000132147		132.147	8702.43	39.6153
					596	0.596	4.5205e-06	1.73681e-05	2.60627e-05	8.40622e-05	0.000132014		132.014	8711.23	39.6353
					597	0.597	4.53443e-06	1.74216e-05	2.60264e-05	8.38983e-05	0.000131881		131.881	8720	39.6552
					598	0.598	4.54838e-06	1.74752e-05	2.59903e-05	8.3735e-05	0.000131749		131.749	8728.73	39.6751
					599	0.599	4.56235e-06	1.75289e-05	2.59542e-05	8.35722e-05	0.000131618		131.618	8737.44	39.6949
					600	0.6	4.57634e-06	1.75826e-05	2.59182e-05	8.34099e-05	0.000131487		131.487	8746.11	39.7146
					601	0.601	4.59034e-06	1.76364e-05	2.58823e-05	8.32482e-05	0.000131357		131.357	8754.75	39.7342
					602	0.602	4.60436e-06	1.76903e-05	2.58465e-05	8.30871e-05	0.000131228		131.228	8763.36	39.7537
					603	0.603	4.6184e-06	1.77442e-05	2.58108e-05	8.29265e-05	0.0001311		131.1	8771.94	39.7732
					604	0.604	4.63245e-06	1.77982e-05	2.57753e-05	8.27664e-05	0.000130972		130.972	8780.48	39.7925
					605	0.605	4.64653e-06	1.78523e-05	2.57398e-05	8.26069e-05	0.000130845		130.845	8789	39.8118
					606	0.606	4.66062e-06	1.79064e-05	2.57044e-05	8.24479e-05	0.000130719		130.719	8797.48	39.831
					607	0.607	4.67473e-06	1.79606e-05	2.56691e-05	8.22894e-05	0.000130594		130.594	8805.93	39.8501
					608	0.608	4.68885e-06	1.80149e-05	2.56339e-05	8.21315e-05	0.000130469		130.469	8814.35	39.8692
					609	0.609	4.703e-06	1.80692e-05	2.55988e-05	8.19741e-05	0.000130345		130.345	8822.73	39.8881
					610	0.61	4.71716e-06	1.81236e-05	2.55638e-05	8.18172e-05	0.000130222		130.222	8831.09	39.907
					611	0.611	4.73134e-06	1.81781e-05	2.55288e-05	8.16609e-05	0.000130099		130.099	8839.41	39.9258
					612	0.612	4.74553e-06	1.82327e-05	2.5494e-05	8.1505e-05	0.000129977		129.977	8847.7	39.9446
					613	0.613	4.75975e-06	1.82873e-05	2.54593e-05	8.13497e-05	0.000129856		129.856	8855.96	39.9632
					614	0.614	4.77398e-06	1.83419e-05	2.54246e-05	8.11949e-05	0.000129735		129.735	8864.19	39.9818
					615	0.615	4.78822e-06	1.83967e-05	2.53901e-05	8.10406e-05	0.000129616		129.616	8872.39	40.0002
					616	0.616	4.80249e-06	1.84515e-05	2.53557e-05	8.08868e-05	0.000129496		129.496	8880.55	40.0186
					617	0.617	4.81677e-06	1.85064e-05	2.53213e-05	8.07336e-05	0.000129378		129.378	8888.68	40.0369
					618	0.618	4.83107e-06	1.85613e-05	2.5287e-05	8.05808e-05	0.00012926		129.26	8896.78	40.0552
					619	0.619	4.84539e-06	1.86163e-05	2.52529e-05	8.04285e-05	0.000129143		129.143	8904.85	40.0733
					620	0.62	4.85972e-06	1.86714e-05	2.52188e-05	8.02768e-05	0.000129027		129.027	8912.89	40.0914
					621	0.621	4.87407e-06	1.87265e-05	2.51848e-05	8.01255e-05	0.000128911		128.911	8920.89	40.1094
					622	0.622	4.88844e-06	1.87817e-05	2.51509e-05	7.99748e-05	0.000128796		128.796	8928.86	40.1273
					623	0.623	4.90283e-06	1.8837e-05	2.51171e-05	7.98245e-05	0.000128681		128.681	8936.8	40.1452
					624	0.624	4.91723e-06	1.88923e-05	2.50833e-05	7.96747e-05	0.000128568		128.568	8944.71	40.1629
					625	0.625	4.93165e-06	1.89477e-05	2.50497e-05	7.95254e-05	0.000128454		128.454	8952.59	40.1806
					626	0.626	4.94609e-06	1.90032e-05	2.50162e-05	7.93766e-05	0.000128342		128.342	8960.43	40.1982
					627	0.627	4.96054e-06	1.90587e-05	2.49827e-05	7.92283e-05	0.00012823		128.23	8968.24	40.2157
					628	0.628	4.97501e-06	1.91143e-05	2.49493e-05	7.90804e-05	0.000128119		128.119	8976.02	40.2332
					629	0.629	4.9895e-06	1.917e-05	2.4916e-05	7.8933e-05	0.000128009		128.009	8983.77	40.2505
					630	0.63	5.00401e-06	1.92257e-05	2.48828e-05	7.87862e-05	0.000127899		127.899	8991.49	40.2678
					631	0.631	5.01853e-06	1.92815e-05	2.48497e-05	7.86397e-05	0.00012779		127.79	8999.17	40.285
					632	0.632	5.03307e-06	1.93374e-05	2.48167e-05	7.84938e-05	0.000127681		127.681	9006.82	40.3021
					633	0.633	5.04763e-06	1.93933e-05	2.47838e-05	7.83483e-05	0.000127573		127.573	9014.44	40.3192
					634	0.634	5.0622e-06	1.94493e-05	2.47509e-05	7.82033e-05	0.000127466		127.466	9022.03	40.3361
					635	0.635	5.07679e-06	1.95054e-05	2.47182e-05	7.80588e-05	0.000127359		127.359	9029.59	40.353
					636	0.636	5.0914e-06	1.95615e-05	2.46855e-05	7.79147e-05	0.000127253		127.253	9037.11	40.3698
					637	0.637	5.10602e-06	1.96177e-05	2.46529e-05	7.77711e-05	0.000127148		127.148	9044.6	40.3866
					638	0.638	5.12066e-06	1.96739e-05	2.46204e-05	7.76279e-05	0.000127043		127.043	9052.06	40.4032
					639	0.639	5.13532e-06	1.97303e-05	2.4588e-05	7.74852e-05	0.000126939		126.939	9059.49	40.4198
					640	0.64	5.15e-06	1.97866e-05	2.45556e-05	7.7343e-05	0.000126835		126.835	9066.88	40.4363
					641	0.641	5.16469e-06	1.98431e-05	2.45234e-05	7.72012e-05	0.000126732		126.732	9074.24	40.4527
					642	0.642	5.1794e-06	1.98996e-05	2.44912e-05	7.70598e-05	0.00012663		126.63	9081.57	40.469
					643	0.643	5.19413e-06	1.99562e-05	2.44591e-05	7.69189e-05	0.000126528		126.528	9088.87	40.4853
					644	0.644	5.20887e-06	2.00128e-05	2.44271e-05	7.67785e-05	0.000126427		126.427	9096.14	40.5015
					645	0.645	5.22363e-06	2.00695e-05	2.43952e-05	7.66385e-05	0.000126327		126.327	9103.37	40.5176
					646	0.646	5.23841e-06	2.01263e-05	2.43633e-05	7.64989e-05	0.000126227		126.227	9110.57	40.5336
					647	0.647	5.2532e-06	2.01832e-05	2.43315e-05	7.63598e-05	0.000126128		126.128	9117.74	40.5495
					648	0.648	5.26801e-06	2.02401e-05	2.42999e-05	7.62211e-05	0.000126029		126.029	9124.88	40.5654
					649	0.649	5.28284e-06	2.0297e-05	2.42683e-05	7.60829e-05	0.000125931		125.931	9131.99	40.5812
					650	0.65	5.29768e-06	2.03541e-05	2.42367e-05	7.59451e-05	0.000125834		125.834	9139.06	40.5969
					651	0.651	5.31254e-06	2.04112e-05	2.42053e-05	7.58077e-05	0.000125737		125.737	9146.1	40.6125
					652	0.652	5.32742e-06	2.04683e-05	2.41739e-05	7.56707e-05	0.00012564		125.64	9153.11	40.6281
					653	0.653	5.34232e-06	2.05255e-05	2.41426e-05	7.55342e-05	0.000125545		125.545	9160.08	40.6436
					654	0.654	5.35723e-06	2.05828e-05	2.41114e-05	7.53981e-05	0.00012545		125.45	9167.03	40.659
					655	0.655	5.37215e-06	2.06402e-05	2.40803e-05	7.52624e-05	0.000125355		125.355	9173.94	40.6743
					656	0.656	5.3871e-06	2.06976e-05	2.40493e-05	7.51272e-05	0.000125261		125.261	9180.82	40.6896
					657	0.657	5.40206e-06	2.07551e-05	2.40183e-05	7.49923e-05	0.000125168		125.168	9187.67	40.7047
					658	0.658	5.41704e-06	2.08126e-05	2.39874e-05	7.48579e-05	0.000125075		125.075	9194.48	40.7198
					659	0.659	5.43203e-06	2.08702e-05	2.39566e-05	7.47239e-05	0.000124983		124.983	9201.27	40.7348
					660	0.66	5.44704e-06	2.09279e-05	2.39258e-05	7.45904e-05	0.000124891		124.891	9208.02	40.7498
					661	0.661	5.46207e-06	2.09856e-05	2.38952e-05	7.44572e-05	0.0001248		124.8	9214.74	40.7647
					662	0.662	5.47711e-06	2.10434e-05	2.38646e-05	7.43244e-05	0.00012471		124.71	9221.42	40.7794
					663	0.663	5.49218e-06	2.11013e-05	2.38341e-05	7.41921e-05	0.00012462		124.62	9228.08	40.7942
					664	0.664	5.50725e-06	2.11592e-05	2.38037e-05	7.40601e-05	0.00012453		124.53	9234.7	40.8088
					665	0.665	5.52235e-06	2.12172e-05	2.37733e-05	7.39286e-05	0.000124441		124.441	9241.29	40.8233
					666	0.666	5.53746e-06	2.12753e-05	2.3743e-05	7.37974e-05	0.000124353		124.353	9247.85	40.8378
					667	0.667	5.55258e-06	2.13334e-05	2.37128e-05	7.36667e-05	0.000124266		124.266	9254.38	40.8522
					668	0.668	5.56773e-06	2.13916e-05	2.36827e-05	7.35364e-05	0.000124178		124.178	9260.87	40.8666
					669	0.669	5.58289e-06	2.14498e-05	2.36526e-05	7.34064e-05	0.000124092		124.092	9267.33	40.8808
					670	0.67	5.59806e-06	2.15081e-05	2.36227e-05	7.32769e-05	0.000124006		124.006	9273.76	40.895
					671	0.671	5.61326e-06	2.15665e-05	2.35927e-05	7.31478e-05	0.00012392		123.92	9280.16	40.9091
					672	0.672	5.62847e-06	2.16249e-05	2.35629e-05	7.3019e-05	0.000123835		123.835	9286.53	40.9231
					673	0.673	5.64369e-06	2.16834e-05	2.35331e-05	7.28906e-05	0.000123751		123.751	9292.86	40.9371
					674	0.674	5.65893e-06	2.1742e-05	2.35035e-05	7.27627e-05	0.000123667		123.667	9299.16	40.951
					675	0.675	5.67419e-06	2.18006e-05	2.34738e-05	7.26351e-05	0.000123584		123.584	9305.43	40.9648
					676	0.676	5.68947e-06	2.18593e-05	2.34443e-05	7.25079e-05	0.000123501		123.501	9311.67	40.9785
					677	0.677	5.70476e-06	2.19181e-05	2.34148e-05	7.23811e-05	0.000123419		123.419	9317.87	40.9921
					678	0.678	5.72007e-06	2.19769e-05	2.33854e-05	7.22546e-05	0.000123337		123.337	9324.05	41.0057
					679	0.679	5.73539e-06	2.20358e-05	2.33561e-05	7.21286e-05	0.000123256		123.256	9330.19	41.0192
					680	0.68	5.75073e-06	2.20947e-05	2.33269e-05	7.20029e-05	0.000123175		123.175	9336.3	41.0327
					681	0.681	5.76609e-06	2.21537e-05	2.32977e-05	7.18776e-05	0.000123095		123.095	9342.38	41.046
					682	0.682	5.78146e-06	2.22128e-05	2.32686e-05	7.17527e-05	0.000123015		123.015	9348.42	41.0593
					683	0.683	5.79685e-06	2.22719e-05	2.32395e-05	7.16281e-05	0.000122936		122.936	9354.43	41.0725
					684	0.684	5.81225e-06	2.23311e-05	2.32105e-05	7.15039e-05	0.000122858		122.858	9360.42	41.0856
					685	0.685	5.82767e-06	2.23903e-05	2.31816e-05	7.13801e-05	0.00012278		122.78	9366.36	41.0987
					686	0.686	5.84311e-06	2.24496e-05	2.31528e-05	7.12567e-05	0.000122702		122.702	9372.28	41.1117
					687	0.687	5.85857e-06	2.2509e-05	2.3124e-05	7.11336e-05	0.000122625		122.625	9378.17	41.1246
					688	0.688	5.87404e-06	2.25685e-05	2.30953e-05	7.10109e-05	0.000122549		122.549	9384.02	41.1374
					689	0.689	5.88952e-06	2.2628e-05	2.30667e-05	7.08886e-05	0.000122473		122.473	9389.84	41.1502
					690	0.69	5.90503e-06	2.26875e-05	2.30382e-05	7.07666e-05	0.000122397		122.397	9395.63	41.1628
					691	0.691	5.92054e-06	2.27471e-05	2.30097e-05	7.0645e-05	0.000122322		122.322	9401.39	41.1754
					692	0.692	5.93608e-06	2.28068e-05	2.29813e-05	7.05237e-05	0.000122248		122.248	9407.12	41.188
					693	0.693	5.95163e-06	2.28666e-05	2.29529e-05	7.04028e-05	0.000122174		122.174	9412.81	41.2005
					694	0.694	5.9672e-06	2.29264e-05	2.29246e-05	7.02823e-05	0.0001221		122.1	9418.47	41.2128
					695	0.695	5.98278e-06	2.29863e-05	2.28964e-05	7.01621e-05	0.000122028		122.028	9424.11	41.2252
					696	0.696	5.99838e-06	2.30462e-05	2.28683e-05	7.00422e-05	0.000121955		121.955	9429.7	41.2374
					697	0.697	6.014e-06	2.31062e-05	2.28402e-05	6.99227e-05	0.000121883		121.883	9435.27	41.2496
					698	0.698	6.02963e-06	2.31662e-05	2.28122e-05	6.98036e-05	0.000121812		121.812	9440.81	41.2617
					699	0.699	6.04527e-06	2.32264e-05	2.27842e-05	6.96848e-05	0.000121741		121.741	9446.31	41.2737
					700	0.7	6.06094e-06	2.32865e-05	2.27563e-05	6.95664e-05	0.00012167		121.67	9451.78	41.2857
					701	0.701	6.07662e-06	2.33468e-05	2.27285e-05	6.94483e-05	0.0001216		121.6	9457.22	41.2975
					702	0.702	6.09231e-06	2.34071e-05	2.27008e-05	6.93305e-05	0.000121531		121.531	9462.63	41.3093
					703	0.703	6.10802e-06	2.34674e-05	2.26731e-05	6.92131e-05	0.000121462		121.462	9468.01	41.3211
					704	0.704	6.12375e-06	2.35279e-05	2.26454e-05	6.90961e-05	0.000121393		121.393	9473.35	41.3327
					705	0.705	6.13949e-06	2.35884e-05	2.26179e-05	6.89793e-05	0.000121325		121.325	9478.67	41.3443
					706	0.706	6.15525e-06	2.36489e-05	2.25904e-05	6.88629e-05	0.000121257		121.257	9483.95	41.3558
					707	0.707	6.17103e-06	2.37095e-05	2.2563e-05	6.87469e-05	0.00012119		121.19	9489.2	41.3673
					708	0.708	6.18682e-06	2.37702e-05	2.25356e-05	6.86312e-05	0.000121124		121.124	9494.42	41.3787
					709	0.709	6.20263e-06	2.38309e-05	2.25083e-05	6.85158e-05	0.000121058		121.058	9499.61	41.39
					710	0.71	6.21845e-06	2.38917e-05	2.24811e-05	6.84007e-05	0.000120992		120.992	9504.76	41.4012
					711	0.711	6.23429e-06	2.39526e-05	2.24539e-05	6.8286e-05	0.000120927		120.927	9509.89	41.4124
					712	0.712	6.25014e-06	2.40135e-05	2.24268e-05	6.81716e-05	0.000120862		120.862	9514.98	41.4234
					713	0.713	6.26601e-06	2.40745e-05	2.23997e-05	6.80576e-05	0.000120798		120.798	9520.04	41.4345
					714	0.714	6.2819e-06	2.41355e-05	2.23728e-05	6.79438e-05	0.000120734		120.734	9525.07	41.4454
					715	0.715	6.2978e-06	2.41966e-05	2.23458e-05	6.78304e-05	0.000120671		120.671	9530.07	41.4563
					716	0.716	6.31372e-06	2.42577e-05	2.2319e-05	6.77173e-05	0.000120608		120.608	9535.04	41.4671
					717	0.717	6.32965e-06	2.4319e-05	2.22922e-05	6.76046e-05	0.000120545		120.545	9539.98	41.4778
					718	0.718	6.3456e-06	2.43802e-05	2.22654e-05	6.74921e-05	0.000120483		120.483	9544.88	41.4885
					719	0.719	6.36157e-06	2.44416e-05	2.22388e-05	6.738e-05	0.000120422		120.422	9549.75	41.4991
					720	0.72	6.37755e-06	2.4503e-05	2.22122e-05	6.72682e-05	0.000120361		120.361	9554.6	41.5096
					721	0.721	6.39355e-06	2.45644e-05	2.21856e-05	6.71567e-05	0.0001203		120.3	9559.41	41.52
					722	0.722	6.40956e-06	2.4626e-05	2.21591e-05	6.70456e-05	0.00012024		120.24	9564.19	41.5304
					723	0.723	6.42559e-06	2.46875e-05	2.21327e-05	6.69347e-05	0.000120181		120.181	9568.94	41.5407
					724	0.724	6.44163e-06	2.47492e-05	2.21063e-05	6.68242e-05	0.000120121		120.121	9573.65	41.551
					725	0.725	6.45769e-06	2.48109e-05	2.208e-05	6.6714e-05	0.000120063		120.063	9578.34	41.5611
					726	0.726	6.47376e-06	2.48726e-05	2.20538e-05	6.6604e-05	0.000120004		120.004	9583	41.5712
					727	0.727	6.48985e-06	2.49345e-05	2.20276e-05	6.64944e-05	0.000119946		119.946	9587.62	41.5813
					728	0.728	6.50596e-06	2.49963e-05	2.20015e-05	6.63851e-05	0.000119889		119.889	9592.21	41.5912
					729	0.729	6.52208e-06	2.50583e-05	2.19754e-05	6.62762e-05	0.000119832		119.832	9596.78	41.6011
					730	0.73	6.53822e-06	2.51203e-05	2.19494e-05	6.61675e-05	0.000119775		119.775	9601.31	41.6109
					731	0.731	6.55437e-06	2.51823e-05	2.19234e-05	6.60591e-05	0.000119719		119.719	9605.81	41.6207
					732	0.732	6.57054e-06	2.52445e-05	2.18975e-05	6.5951e-05	0.000119664		119.664	9610.28	41.6304
					733	0.733	6.58672e-06	2.53066e-05	2.18717e-05	6.58432e-05	0.000119608		119.608	9614.72	41.64
					734	0.734	6.60292e-06	2.53689e-05	2.18459e-05	6.57358e-05	0.000119553		119.553	9619.13	41.6495
					735	0.735	6.61914e-06	2.54312e-05	2.18202e-05	6.56286e-05	0.000119499		119.499	9623.5	41.659
					736	0.736	6.63537e-06	2.54935e-05	2.17945e-05	6.55217e-05	0.000119445		119.445	9627.85	41.6684
					737	0.737	6.65161e-06	2.5556e-05	2.17689e-05	6.54151e-05	0.000119392		119.392	9632.16	41.6777
					738	0.738	6.66788e-06	2.56184e-05	2.17434e-05	6.53089e-05	0.000119339		119.339	9636.45	41.687
					739	0.739	6.68415e-06	2.5681e-05	2.17179e-05	6.52029e-05	0.000119286		119.286	9640.7	41.6962
					740	0.74	6.70044e-06	2.57436e-05	2.16925e-05	6.50972e-05	0.000119234		119.234	9644.93	41.7053
					741	0.741	6.71675e-06	2.58062e-05	2.16671e-05	6.49918e-05	0.000119182		119.182	9649.12	41.7144
					742	0.742	6.73308e-06	2.58689e-05	2.16418e-05	6.48867e-05	0.00011913		119.13	9653.28	41.7234
					743	0.743	6.74941e-06	2.59317e-05	2.16165e-05	6.47818e-05	0.00011908		119.08	9657.41	41.7323
					744	0.744	6.76577e-06	2.59945e-05	2.15913e-05	6.46773e-05	0.000119029		119.029	9661.51	41.7412
					745	0.745	6.78214e-06	2.60574e-05	2.15662e-05	6.45731e-05	0.000118979		118.979	9665.58	41.75
					746	0.746	6.79852e-06	2.61204e-05	2.15411e-05	6.44691e-05	0.000118929		118.929	9669.62	41.7587
					747	0.747	6.81492e-06	2.61834e-05	2.15161e-05	6.43654e-05	0.00011888		118.88	9673.63	41.7674
					748	0.748	6.83134e-06	2.62465e-05	2.14911e-05	6.42621e-05	0.000118831		118.831	9677.61	41.776
					749	0.749	6.84777e-06	2.63096e-05	2.14662e-05	6.41589e-05	0.000118782		118.782	9681.56	41.7845
					750	0.75	6.86421e-06	2.63728e-05	2.14413e-05	6.40561e-05	0.000118734		118.734	9685.48	41.7929
					751	0.751	6.88067e-06	2.6436e-05	2.14165e-05	6.39536e-05	0.000118687		118.687	9689.37	41.8013
					752	0.752	6.89715e-06	2.64993e-05	2.13917e-05	6.38513e-05	0.00011864		118.64	9693.23	41.8096
					753	0.753	6.91364e-06	2.65627e-05	2.1367e-05	6.37493e-05	0.000118593		118.593	9697.06	41.8179
					754	0.754	6.93015e-06	2.66261e-05	2.13424e-05	6.36476e-05	0.000118546		118.546	9700.85	41.8261
					755	0.755	6.94667e-06	2.66896e-05	2.13178e-05	6.35462e-05	0.0001185		118.5	9704.62	41.8342
					756	0.756	6.96321e-06	2.67531e-05	2.12932e-05	6.34451e-05	0.000118455		118.455	9708.36	41.8423
					757	0.757	6.97976e-06	2.68167e-05	2.12687e-05	6.33442e-05	0.000118409		118.409	9712.07	41.8503
					758	0.758	6.99633e-06	2.68804e-05	2.12443e-05	6.32436e-05	0.000118365		118.365	9715.74	41.8582
					759	0.759	7.01291e-06	2.69441e-05	2.12199e-05	6.31432e-05	0.00011832		118.32	9719.39	41.866
					760	0.76	7.02951e-06	2.70079e-05	2.11956e-05	6.30432e-05	0.000118276		118.276	9723.01	41.8738
					761	0.761	7.04612e-06	2.70717e-05	2.11713e-05	6.29434e-05	0.000118233		118.233	9726.6	41.8815
					762	0.762	7.06275e-06	2.71356e-05	2.11471e-05	6.28438e-05	0.000118189		118.189	9730.15	41.8892
					763	0.763	7.0794e-06	2.71995e-05	2.11229e-05	6.27446e-05	0.000118146		118.146	9733.68	41.8968
					764	0.764	7.09605e-06	2.72635e-05	2.10988e-05	6.26456e-05	0.000118104		118.104	9737.18	41.9043
					765	0.765	7.11273e-06	2.73276e-05	2.10748e-05	6.25469e-05	0.000118062		118.062	9740.65	41.9118
					766	0.766	7.12942e-06	2.73917e-05	2.10508e-05	6.24484e-05	0.00011802		118.02	9744.09	41.9192
					767	0.767	7.14612e-06	2.74559e-05	2.10268e-05	6.23502e-05	0.000117979		117.979	9747.5	41.9265
					768	0.768	7.16284e-06	2.75201e-05	2.10029e-05	6.22523e-05	0.000117938		117.938	9750.88	41.9338
					769	0.769	7.17957e-06	2.75844e-05	2.0979e-05	6.21546e-05	0.000117898		117.898	9754.23	41.941
					770	0.77	7.19632e-06	2.76488e-05	2.09552e-05	6.20572e-05	0.000117857		117.857	9757.55	41.9481
					771	0.771	7.21309e-06	2.77132e-05	2.09315e-05	6.196e-05	0.000117818		117.818	9760.84	41.9552
					772	0.772	7.22987e-06	2.77776e-05	2.09078e-05	6.18631e-05	0.000117778		117.778	9764.1	41.9622
					773	0.773	7.24666e-06	2.78422e-05	2.08841e-05	6.17665e-05	0.000117739		117.739	9767.33	41.9692
					774	0.774	7.26347e-06	2.79067e-05	2.08605e-05	6.16701e-05	0.000117701		117.701	9770.53	41.976
					775	0.775	7.28029e-06	2.79714e-05	2.0837e-05	6.1574e-05	0.000117663		117.663	9773.71	41.9828
					776	0.776	7.29713e-06	2.80361e-05	2.08135e-05	6.14781e-05	0.000117625		117.625	9776.85	41.9896
					777	0.777	7.31398e-06	2.81008e-05	2.079e-05	6.13825e-05	0.000117587		117.587	9779.96	41.9963
					778	0.778	7.33085e-06	2.81656e-05	2.07666e-05	6.12871e-05	0.00011755		117.55	9783.05	42.0029
					779	0.779	7.34774e-06	2.82305e-05	2.07433e-05	6.1192e-05	0.000117514		117.514	9786.11	42.0095
					780	0.78	7.36463e-06	2.82954e-05	2.072e-05	6.10972e-05	0.000117477		117.477	9789.13	42.016
					781	0.781	7.38155e-06	2.83604e-05	2.06967e-05	6.10025e-05	0.000117441		117.441	9792.13	42.0224
					782	0.782	7.39848e-06	2.84254e-05	2.06735e-05	6.09082e-05	0.000117406		117.406	9795.1	42.0288
					783	0.783	7.41542e-06	2.84905e-05	2.06504e-05	6.08141e-05	0.00011737		117.37	9798.04	42.0351
					784	0.784	7.43238e-06	2.85557e-05	2.06273e-05	6.07202e-05	0.000117336		117.336	9800.95	42.0413
					785	0.785	7.44935e-06	2.86209e-05	2.06042e-05	6.06266e-05	0.000117301		117.301	9803.83	42.0475
					786	0.786	7.46634e-06	2.86862e-05	2.05812e-05	6.05332e-05	0.000117267		117.267	9806.69	42.0536
					787	0.787	7.48334e-06	2.87515e-05	2.05583e-05	6.044e-05	0.000117233		117.233	9809.51	42.0597
					788	0.788	7.50035e-06	2.88169e-05	2.05354e-05	6.03472e-05	0.0001172		117.2	9812.31	42.0657
					789	0.789	7.51739e-06	2.88823e-05	2.05125e-05	6.02545e-05	0.000117167		117.167	9815.08	42.0716
					790	0.79	7.53443e-06	2.89478e-05	2.04897e-05	6.01621e-05	0.000117134		117.134	9817.81	42.0775
					791	0.791	7.55149e-06	2.90134e-05	2.04669e-05	6.00699e-05	0.000117102		117.102	9820.52	42.0833
					792	0.792	7.56857e-06	2.9079e-05	2.04442e-05	5.9978e-05	0.00011707		117.07	9823.21	42.089
					793	0.793	7.58566e-06	2.91446e-05	2.04215e-05	5.98863e-05	0.000117038		117.038	9825.86	42.0947
					794	0.794	7.60276e-06	2.92103e-05	2.03989e-05	5.97948e-05	0.000117007		117.007	9828.48	42.1003
					795	0.795	7.61988e-06	2.92761e-05	2.03763e-05	5.97036e-05	0.000116976		116.976	9831.08	42.1059
					796	0.796	7.63702e-06	2.93419e-05	2.03538e-05	5.96126e-05	0.000116945		116.945	9833.65	42.1114
					797	0.797	7.65417e-06	2.94078e-05	2.03313e-05	5.95219e-05	0.000116915		116.915	9836.19	42.1168
					798	0.798	7.67133e-06	2.94738e-05	2.03089e-05	5.94314e-05	0.000116885		116.885	9838.7	42.1222
					799	0.799	7.68851e-06	2.95398e-05	2.02865e-05	5.93411e-05	0.000116856		116.856	9841.18	42.1275
					800	0.8	7.7057e-06	2.96058e-05	2.02642e-05	5.9251e-05	0.000116827		116.827	9843.63	42.1328
					801	0.801	7.72291e-06	2.96719e-05	2.02419e-05	5.91612e-05	0.000116798		116.798	9846.06	42.138
					802	0.802	7.74013e-06	2.97381e-05	2.02197e-05	5.90716e-05	0.00011677		116.77	9848.46	42.1431
					803	0.803	7.75737e-06	2.98043e-05	2.01975e-05	5.89823e-05	0.000116741		116.741	9850.83	42.1482
					804	0.804	7.77462e-06	2.98706e-05	2.01753e-05	5.88931e-05	0.000116714		116.714	9853.17	42.1532
					805	0.805	7.79189e-06	2.9937e-05	2.01532e-05	5.88042e-05	0.000116686		116.686	9855.49	42.1581
					806	0.806	7.80917e-06	3.00033e-05	2.01311e-05	5.87156e-05	0.000116659		116.659	9857.77	42.163
					807	0.807	7.82646e-06	3.00698e-05	2.01091e-05	5.86271e-05	0.000116632		116.632	9860.03	42.1678
					808	0.808	7.84377e-06	3.01363e-05	2.00871e-05	5.85389e-05	0.000116606		116.606	9862.26	42.1726
					809	0.809	7.86109e-06	3.02029e-05	2.00652e-05	5.84509e-05	0.00011658		116.58	9864.47	42.1773
					810	0.81	7.87843e-06	3.02695e-05	2.00433e-05	5.83631e-05	0.000116554		116.554	9866.64	42.182
					811	0.811	7.89578e-06	3.03361e-05	2.00215e-05	5.82756e-05	0.000116529		116.529	9868.79	42.1866
					812	0.812	7.91315e-06	3.04029e-05	1.99997e-05	5.81882e-05	0.000116504		116.504	9870.91	42.1911
					813	0.813	7.93053e-06	3.04696e-05	1.9978e-05	5.81011e-05	0.000116479		116.479	9873	42.1956
					814	0.814	7.94793e-06	3.05365e-05	1.99563e-05	5.80142e-05	0.000116455		116.455	9875.07	42.2
					815	0.815	7.96534e-06	3.06034e-05	1.99346e-05	5.79275e-05	0.000116431		116.431	9877.11	42.2043
					816	0.816	7.98276e-06	3.06703e-05	1.9913e-05	5.78411e-05	0.000116407		116.407	9879.12	42.2086
					817	0.817	8.0002e-06	3.07373e-05	1.98914e-05	5.77549e-05	0.000116384		116.384	9881.1	42.2129
					818	0.818	8.01766e-06	3.08044e-05	1.98699e-05	5.76688e-05	0.000116361		116.361	9883.05	42.217
					819	0.819	8.03512e-06	3.08715e-05	1.98484e-05	5.7583e-05	0.000116338		116.338	9884.98	42.2212
					820	0.82	8.05261e-06	3.09387e-05	1.9827e-05	5.74975e-05	0.000116316		116.316	9886.89	42.2252
					821	0.821	8.0701e-06	3.10059e-05	1.98056e-05	5.74121e-05	0.000116294		116.294	9888.76	42.2292
					822	0.822	8.08761e-06	3.10732e-05	1.97842e-05	5.73269e-05	0.000116272		116.272	9890.61	42.2332
					823	0.823	8.10514e-06	3.11405e-05	1.97629e-05	5.7242e-05	0.000116251		116.251	9892.43	42.2371
					824	0.824	8.12268e-06	3.12079e-05	1.97417e-05	5.71572e-05	0.000116229		116.229	9894.22	42.2409
					825	0.825	8.14023e-06	3.12753e-05	1.97204e-05	5.70727e-05	0.000116209		116.209	9895.99	42.2447
					826	0.826	8.1578e-06	3.13428e-05	1.96993e-05	5.69884e-05	0.000116188		116.188	9897.73	42.2484
					827	0.827	8.17538e-06	3.14104e-05	1.96781e-05	5.69043e-05	0.000116168		116.168	9899.44	42.252
					828	0.828	8.19298e-06	3.1478e-05	1.9657e-05	5.68204e-05	0.000116148		116.148	9901.13	42.2556
					829	0.829	8.21059e-06	3.15456e-05	1.9636e-05	5.67367e-05	0.000116129		116.129	9902.78	42.2592
					830	0.83	8.22821e-06	3.16134e-05	1.9615e-05	5.66533e-05	0.00011611		116.11	9904.42	42.2627
					831	0.831	8.24585e-06	3.16811e-05	1.9594e-05	5.657e-05	0.000116091		116.091	9906.02	42.2661
					832	0.832	8.26351e-06	3.1749e-05	1.95731e-05	5.64869e-05	0.000116072		116.072	9907.6	42.2694
					833	0.833	8.28117e-06	3.18168e-05	1.95522e-05	5.64041e-05	0.000116054		116.054	9909.16	42.2728
					834	0.834	8.29885e-06	3.18848e-05	1.95314e-05	5.63214e-05	0.000116036		116.036	9910.68	42.276
					835	0.835	8.31655e-06	3.19528e-05	1.95106e-05	5.6239e-05	0.000116019		116.019	9912.18	42.2792
					836	0.836	8.33426e-06	3.20208e-05	1.94898e-05	5.61567e-05	0.000116002		116.002	9913.66	42.2824
					837	0.837	8.35198e-06	3.20889e-05	1.94691e-05	5.60747e-05	0.000115985		115.985	9915.11	42.2854
					838	0.838	8.36972e-06	3.2157e-05	1.94484e-05	5.59929e-05	0.000115968		115.968	9916.53	42.2885
					839	0.839	8.38747e-06	3.22252e-05	1.94278e-05	5.59112e-05	0.000115952		115.952	9917.92	42.2915
					840	0.84	8.40524e-06	3.22935e-05	1.94072e-05	5.58298e-05	0.000115936		115.936	9919.29	42.2944
					841	0.841	8.42302e-06	3.23618e-05	1.93866e-05	5.57485e-05	0.00011592		115.92	9920.64	42.2972
					842	0.842	8.44081e-06	3.24302e-05	1.93661e-05	5.56675e-05	0.000115905		115.905	9921.95	42.3
					843	0.843	8.45862e-06	3.24986e-05	1.93456e-05	5.55867e-05	0.00011589		115.89	9923.24	42.3028
					844	0.844	8.47644e-06	3.25671e-05	1.93252e-05	5.5506e-05	0.000115875		115.875	9924.51	42.3055
					845	0.845	8.49428e-06	3.26356e-05	1.93048e-05	5.54256e-05	0.00011586		115.86	9925.75	42.3081
					846	0.846	8.51213e-06	3.27042e-05	1.92845e-05	5.53453e-05	0.000115846		115.846	9926.96	42.3107
					847	0.847	8.52999e-06	3.27728e-05	1.92642e-05	5.52653e-05	0.000115832		115.832	9928.15	42.3133
					848	0.848	8.54787e-06	3.28415e-05	1.92439e-05	5.51854e-05	0.000115819		115.819	9929.31	42.3157
					849	0.849	8.56576e-06	3.29103e-05	1.92237e-05	5.51057e-05	0.000115805		115.805	9930.45	42.3182
					850	0.85	8.58367e-06	3.2979e-05	1.92035e-05	5.50263e-05	0.000115792		115.792	9931.56	42.3205
					851	0.851	8.60159e-06	3.30479e-05	1.91833e-05	5.4947e-05	0.00011578		115.78	9932.65	42.3228
					852	0.852	8.61952e-06	3.31168e-05	1.91632e-05	5.48679e-05	0.000115767		115.767	9933.71	42.3251
					853	0.853	8.63747e-06	3.31858e-05	1.91431e-05	5.4789e-05	0.000115755		115.755	9934.75	42.3273
					854	0.854	8.65543e-06	3.32548e-05	1.91231e-05	5.47103e-05	0.000115744		115.744	9935.76	42.3295
					855	0.855	8.67341e-06	3.33238e-05	1.91031e-05	5.46318e-05	0.000115732		115.732	9936.74	42.3316
					856	0.856	8.6914e-06	3.33929e-05	1.90831e-05	5.45534e-05	0.000115721		115.721	9937.7	42.3336
					857	0.857	8.7094e-06	3.34621e-05	1.90632e-05	5.44753e-05	0.00011571		115.71	9938.64	42.3356
					858	0.858	8.72742e-06	3.35313e-05	1.90434e-05	5.43973e-05	0.000115699		115.699	9939.55	42.3375
					859	0.859	8.74545e-06	3.36006e-05	1.90235e-05	5.43196e-05	0.000115689		115.689	9940.43	42.3394
					860	0.86	8.76349e-06	3.36699e-05	1.90037e-05	5.4242e-05	0.000115679		115.679	9941.29	42.3412
					861	0.861	8.78155e-06	3.37393e-05	1.89839e-05	5.41646e-05	0.000115669		115.669	9942.13	42.343
					862	0.862	8.79963e-06	3.38088e-05	1.89642e-05	5.40874e-05	0.00011566		115.66	9942.94	42.3448
					863	0.863	8.81771e-06	3.38782e-05	1.89445e-05	5.40104e-05	0.000115651		115.651	9943.72	42.3464
					864	0.864	8.83581e-06	3.39478e-05	1.89249e-05	5.39335e-05	0.000115642		115.642	9944.48	42.348
					865	0.865	8.85392e-06	3.40174e-05	1.89053e-05	5.38569e-05	0.000115633		115.633	9945.22	42.3496
					866	0.866	8.87205e-06	3.4087e-05	1.88857e-05	5.37804e-05	0.000115625		115.625	9945.93	42.3511
					867	0.867	8.89019e-06	3.41567e-05	1.88662e-05	5.37041e-05	0.000115617		115.617	9946.62	42.3526
					868	0.868	8.90835e-06	3.42265e-05	1.88467e-05	5.3628e-05	0.00011561		115.61	9947.28	42.354
					869	0.869	8.92652e-06	3.42963e-05	1.88272e-05	5.35521e-05	0.000115602		115.602	9947.92	42.3554
					870	0.87	8.9447e-06	3.43661e-05	1.88078e-05	5.34763e-05	0.000115595		115.595	9948.53	42.3567
					871	0.871	8.96289e-06	3.4436e-05	1.87884e-05	5.34008e-05	0.000115588		115.588	9949.12	42.3579
					872	0.872	8.9811e-06	3.4506e-05	1.87691e-05	5.33254e-05	0.000115582		115.582	9949.68	42.3591
					873	0.873	8.99933e-06	3.4576e-05	1.87498e-05	5.32502e-05	0.000115575		115.575	9950.23	42.3603
					874	0.874	9.01756e-06	3.46461e-05	1.87305e-05	5.31751e-05	0.000115569		115.569	9950.74	42.3614
					875	0.875	9.03581e-06	3.47162e-05	1.87112e-05	5.31003e-05	0.000115564		115.564	9951.24	42.3624
					876	0.876	9.05408e-06	3.47864e-05	1.8692e-05	5.30256e-05	0.000115558		115.558	9951.7	42.3634
					877	0.877	9.07235e-06	3.48566e-05	1.86729e-05	5.29511e-05	0.000115553		115.553	9952.15	42.3644
					878	0.878	9.09065e-06	3.49269e-05	1.86538e-05	5.28768e-05	0.000115548		115.548	9952.57	42.3653
					879	0.879	9.10895e-06	3.49972e-05	1.86347e-05	5.28026e-05	0.000115543		115.543	9952.97	42.3661
					880	0.88	9.12727e-06	3.50676e-05	1.86156e-05	5.27286e-05	0.000115539		115.539	9953.34	42.3669
					881	0.881	9.1456e-06	3.5138e-05	1.85966e-05	5.26548e-05	0.000115535		115.535	9953.69	42.3676
					882	0.882	9.16394e-06	3.52085e-05	1.85776e-05	5.25812e-05	0.000115531		115.531	9954.02	42.3683
					883	0.883	9.1823e-06	3.5279e-05	1.85587e-05	5.25077e-05	0.000115528		115.528	9954.32	42.369
					884	0.884	9.20068e-06	3.53496e-05	1.85398e-05	5.24344e-05	0.000115524		115.524	9954.6	42.3696
					885	0.885	9.21906e-06	3.54203e-05	1.85209e-05	5.23613e-05	0.000115522		115.522	9954.85	42.3701
					886	0.886	9.23746e-06	3.5491e-05	1.8502e-05	5.22884e-05	0.000115519		115.519	9955.09	42.3706
					887	0.887	9.25587e-06	3.55617e-05	1.84832e-05	5.22156e-05	0.000115516		115.516	9955.3	42.3711
					888	0.888	9.2743e-06	3.56325e-05	1.84645e-05	5.2143e-05	0.000115514		115.514	9955.48	42.3715
					889	0.889	9.29274e-06	3.57033e-05	1.84457e-05	5.20705e-05	0.000115512		115.512	9955.64	42.3718
					890	0.89	9.31119e-06	3.57742e-05	1.8427e-05	5.19983e-05	0.000115511		115.511	9955.78	42.3721
					891	0.891	9.32966e-06	3.58452e-05	1.84084e-05	5.19262e-05	0.000115509		115.509	9955.9	42.3724
					892	0.892	9.34814e-06	3.59162e-05	1.83897e-05	5.18542e-05	0.000115508		115.508	9955.99	42.3725
					893	0.893	9.36663e-06	3.59872e-05	1.83712e-05	5.17825e-05	0.000115507		115.507	9956.06	42.3727
					894	0.894	9.38514e-06	3.60583e-05	1.83526e-05	5.17109e-05	0.000115507		115.507	9956.11	42.3728
					895	0.895	9.40366e-06	3.61295e-05	1.83341e-05	5.16394e-05	0.000115507		115.507	9956.14	42.3729
					896	0.896	9.42219e-06	3.62007e-05	1.83156e-05	5.15681e-05	0.000115507		115.507	9956.14	42.3729
					897	0.897	9.44074e-06	3.6272e-05	1.82971e-05	5.1497e-05	0.000115507		115.507	9956.12	42.3728
					898	0.898	9.4593e-06	3.63433e-05	1.82787e-05	5.14261e-05	0.000115507		115.507	9956.07	42.3727
					899	0.899	9.47787e-06	3.64146e-05	1.82603e-05	5.13553e-05	0.000115508		115.508	9956.01	42.3726
					900	0.9	9.49646e-06	3.6486e-05	1.8242e-05	5.12847e-05	0.000115509		115.509	9955.92	42.3724
					901	0.901	9.51506e-06	3.65575e-05	1.82237e-05	5.12142e-05	0.00011551		115.51	9955.81	42.3722
					902	0.902	9.53367e-06	3.6629e-05	1.82054e-05	5.11439e-05	0.000115512		115.512	9955.68	42.3719
					903	0.903	9.5523e-06	3.67006e-05	1.81871e-05	5.10738e-05	0.000115514		115.514	9955.52	42.3715
					904	0.904	9.57094e-06	3.67722e-05	1.81689e-05	5.10038e-05	0.000115516		115.516	9955.34	42.3712
					905	0.905	9.58959e-06	3.68439e-05	1.81507e-05	5.0934e-05	0.000115518		115.518	9955.14	42.3707
					906	0.906	9.60825e-06	3.69156e-05	1.81326e-05	5.08644e-05	0.000115521		115.521	9954.92	42.3703
					907	0.907	9.62693e-06	3.69873e-05	1.81145e-05	5.07949e-05	0.000115524		115.524	9954.68	42.3697
					908	0.908	9.64563e-06	3.70592e-05	1.80964e-05	5.07255e-05	0.000115527		115.527	9954.41	42.3692
					909	0.909	9.66433e-06	3.7131e-05	1.80783e-05	5.06563e-05	0.00011553		115.53	9954.12	42.3686
					910	0.91	9.68305e-06	3.72029e-05	1.80603e-05	5.05873e-05	0.000115534		115.534	9953.81	42.3679
					911	0.911	9.70178e-06	3.72749e-05	1.80423e-05	5.05185e-05	0.000115537		115.537	9953.48	42.3672
					912	0.912	9.72053e-06	3.73469e-05	1.80244e-05	5.04497e-05	0.000115542		115.542	9953.13	42.3664
					913	0.913	9.73929e-06	3.7419e-05	1.80065e-05	5.03812e-05	0.000115546		115.546	9952.75	42.3656
					914	0.914	9.75806e-06	3.74911e-05	1.79886e-05	5.03128e-05	0.000115551		115.551	9952.35	42.3648
					915	0.915	9.77684e-06	3.75633e-05	1.79707e-05	5.02446e-05	0.000115555		115.555	9951.93	42.3639
					916	0.916	9.79564e-06	3.76355e-05	1.79529e-05	5.01765e-05	0.000115561		115.561	9951.49	42.363
					917	0.917	9.81445e-06	3.77078e-05	1.79351e-05	5.01085e-05	0.000115566		115.566	9951.03	42.362
					918	0.918	9.83327e-06	3.77801e-05	1.79174e-05	5.00407e-05	0.000115572		115.572	9950.55	42.361
					919	0.919	9.85211e-06	3.78525e-05	1.78997e-05	4.99731e-05	0.000115577		115.577	9950.04	42.3599
					920	0.92	9.87096e-06	3.79249e-05	1.7882e-05	4.99056e-05	0.000115583		115.583	9949.52	42.3588
					921	0.921	9.88982e-06	3.79974e-05	1.78643e-05	4.98383e-05	0.00011559		115.59	9948.97	42.3576
					922	0.922	9.9087e-06	3.80699e-05	1.78467e-05	4.97711e-05	0.000115596		115.596	9948.4	42.3564
					923	0.923	9.92759e-06	3.81425e-05	1.78291e-05	4.97041e-05	0.000115603		115.603	9947.81	42.3551
					924	0.924	9.94649e-06	3.82151e-05	1.78115e-05	4.96372e-05	0.00011561		115.61	9947.2	42.3538
					925	0.925	9.96541e-06	3.82878e-05	1.7794e-05	4.95705e-05	0.000115618		115.618	9946.57	42.3525
					926	0.926	9.98433e-06	3.83605e-05	1.77765e-05	4.95039e-05	0.000115625		115.625	9945.92	42.3511
					927	0.927	1.00033e-05	3.84333e-05	1.77591e-05	4.94375e-05	0.000115633		115.633	9945.25	42.3497
					928	0.928	1.00222e-05	3.85061e-05	1.77416e-05	4.93712e-05	0.000115641		115.641	9944.55	42.3482
					929	0.929	1.00412e-05	3.8579e-05	1.77242e-05	4.93051e-05	0.000115649		115.649	9943.84	42.3467
					930	0.93	1.00602e-05	3.86519e-05	1.77069e-05	4.92391e-05	0.000115658		115.658	9943.11	42.3451
					931	0.931	1.00792e-05	3.87249e-05	1.76895e-05	4.91733e-05	0.000115667		115.667	9942.35	42.3435
					932	0.932	1.00982e-05	3.87979e-05	1.76722e-05	4.91076e-05	0.000115676		115.676	9941.57	42.3419
					933	0.933	1.01172e-05	3.88709e-05	1.76549e-05	4.90421e-05	0.000115685		115.685	9940.78	42.3402
					934	0.934	1.01362e-05	3.89441e-05	1.76377e-05	4.89767e-05	0.000115695		115.695	9939.96	42.3384
					935	0.935	1.01553e-05	3.90172e-05	1.76205e-05	4.89114e-05	0.000115704		115.704	9939.12	42.3366
					936	0.936	1.01743e-05	3.90904e-05	1.76033e-05	4.88463e-05	0.000115714		115.714	9938.27	42.3348
					937	0.937	1.01934e-05	3.91637e-05	1.75861e-05	4.87813e-05	0.000115725		115.725	9937.39	42.3329
					938	0.938	1.02125e-05	3.9237e-05	1.7569e-05	4.87165e-05	0.000115735		115.735	9936.49	42.331
					939	0.939	1.02316e-05	3.93104e-05	1.75519e-05	4.86518e-05	0.000115746		115.746	9935.57	42.3291
					940	0.94	1.02507e-05	3.93838e-05	1.75349e-05	4.85873e-05	0.000115757		115.757	9934.63	42.3271
					941	0.941	1.02698e-05	3.94573e-05	1.75178e-05	4.85229e-05	0.000115768		115.768	9933.68	42.325
					942	0.942	1.02889e-05	3.95308e-05	1.75008e-05	4.84587e-05	0.000115779		115.779	9932.7	42.3229
					943	0.943	1.03081e-05	3.96044e-05	1.74838e-05	4.83946e-05	0.000115791		115.791	9931.7	42.3208
					944	0.944	1.03272e-05	3.9678e-05	1.74669e-05	4.83306e-05	0.000115803		115.803	9930.68	42.3187
					945	0.945	1.03464e-05	3.97516e-05	1.745e-05	4.82668e-05	0.000115815		115.815	9929.65	42.3164
					946	0.946	1.03656e-05	3.98253e-05	1.74331e-05	4.82031e-05	0.000115827		115.827	9928.59	42.3142
					947	0.947	1.03848e-05	3.98991e-05	1.74163e-05	4.81395e-05	0.00011584		115.84	9927.51	42.3119
					948	0.948	1.0404e-05	3.99729e-05	1.73994e-05	4.80761e-05	0.000115852		115.852	9926.42	42.3096
					949	0.949	1.04232e-05	4.00468e-05	1.73827e-05	4.80128e-05	0.000115865		115.865	9925.3	42.3072
					950	0.95	1.04425e-05	4.01207e-05	1.73659e-05	4.79497e-05	0.000115879		115.879	9924.17	42.3048
					951	0.951	1.04617e-05	4.01946e-05	1.73492e-05	4.78867e-05	0.000115892		115.892	9923.01	42.3023
					952	0.952	1.0481e-05	4.02686e-05	1.73325e-05	4.78239e-05	0.000115906		115.906	9921.84	42.2998
					953	0.953	1.05003e-05	4.03427e-05	1.73158e-05	4.77611e-05	0.00011592		115.92	9920.65	42.2973
					954	0.954	1.05195e-05	4.04168e-05	1.72991e-05	4.76985e-05	0.000115934		115.934	9919.44	42.2947
					955	0.955	1.05388e-05	4.04909e-05	1.72825e-05	4.76361e-05	0.000115948		115.948	9918.21	42.2921
					956	0.956	1.05581e-05	4.05651e-05	1.72659e-05	4.75738e-05	0.000115963		115.963	9916.96	42.2894
					957	0.957	1.05775e-05	4.06394e-05	1.72494e-05	4.75116e-05	0.000115978		115.978	9915.69	42.2867
					958	0.958	1.05968e-05	4.07137e-05	1.72329e-05	4.74496e-05	0.000115993		115.993	9914.4	42.2839
					959	0.959	1.06162e-05	4.0788e-05	1.72164e-05	4.73877e-05	0.000116008		116.008	9913.09	42.2812
					960	0.96	1.06355e-05	4.08624e-05	1.71999e-05	4.73259e-05	0.000116024		116.024	9911.77	42.2783
					961	0.961	1.06549e-05	4.09368e-05	1.71835e-05	4.72642e-05	0.000116039		116.039	9910.43	42.2755
					962	0.962	1.06743e-05	4.10113e-05	1.7167e-05	4.72027e-05	0.000116055		116.055	9909.06	42.2726
					963	0.963	1.06937e-05	4.10859e-05	1.71507e-05	4.71414e-05	0.000116072		116.072	9907.68	42.2696
					964	0.964	1.07131e-05	4.11604e-05	1.71343e-05	4.70801e-05	0.000116088		116.088	9906.28	42.2666
					965	0.965	1.07325e-05	4.12351e-05	1.7118e-05	4.7019e-05	0.000116105		116.105	9904.87	42.2636
					966	0.966	1.0752e-05	4.13097e-05	1.71017e-05	4.6958e-05	0.000116121		116.121	9903.43	42.2605
					967	0.967	1.07714e-05	4.13845e-05	1.70854e-05	4.68972e-05	0.000116138		116.138	9901.97	42.2574
					968	0.968	1.07909e-05	4.14592e-05	1.70692e-05	4.68364e-05	0.000116156		116.156	9900.5	42.2543
					969	0.969	1.08103e-05	4.15341e-05	1.7053e-05	4.67759e-05	0.000116173		116.173	9899.01	42.2511
					970	0.97	1.08298e-05	4.16089e-05	1.70368e-05	4.67154e-05	0.000116191		116.191	9897.5	42.2479
					971	0.971	1.08493e-05	4.16839e-05	1.70206e-05	4.66551e-05	0.000116209		116.209	9895.97	42.2446
					972	0.972	1.08688e-05	4.17588e-05	1.70045e-05	4.65949e-05	0.000116227		116.227	9894.43	42.2413
					973	0.973	1.08884e-05	4.18338e-05	1.69884e-05	4.65348e-05	0.000116245		116.245	9892.87	42.238
					974	0.974	1.09079e-05	4.19089e-05	1.69723e-05	4.64749e-05	0.000116264		116.264	9891.29	42.2346
					975	0.975	1.09275e-05	4.1984e-05	1.69563e-05	4.6415e-05	0.000116283		116.283	9889.69	42.2312
					976	0.976	1.0947e-05	4.20592e-05	1.69402e-05	4.63553e-05	0.000116302		116.302	9888.07	42.2278
					977	0.977	1.09666e-05	4.21344e-05	1.69243e-05	4.62958e-05	0.000116321		116.321	9886.44	42.2243
					978	0.978	1.09862e-05	4.22096e-05	1.69083e-05	4.62363e-05	0.00011634		116.34	9884.78	42.2207
					979	0.979	1.10058e-05	4.22849e-05	1.68924e-05	4.6177e-05	0.00011636		116.36	9883.11	42.2172
					980	0.98	1.10254e-05	4.23603e-05	1.68764e-05	4.61179e-05	0.00011638		116.38	9881.43	42.2136
					981	0.981	1.1045e-05	4.24357e-05	1.68606e-05	4.60588e-05	0.0001164		116.4	9879.72	42.2099
					982	0.982	1.10646e-05	4.25111e-05	1.68447e-05	4.59999e-05	0.00011642		116.42	9878	42.2063
					983	0.983	1.10843e-05	4.25866e-05	1.68289e-05	4.59411e-05	0.000116441		116.441	9876.26	42.2025
					984	0.984	1.11039e-05	4.26621e-05	1.68131e-05	4.58824e-05	0.000116462		116.462	9874.51	42.1988
					985	0.985	1.11236e-05	4.27377e-05	1.67973e-05	4.58238e-05	0.000116482		116.482	9872.73	42.195
					986	0.986	1.11433e-05	4.28133e-05	1.67816e-05	4.57654e-05	0.000116504		116.504	9870.94	42.1912
					987	0.987	1.1163e-05	4.2889e-05	1.67659e-05	4.57071e-05	0.000116525		116.525	9869.13	42.1873
					988	0.988	1.11827e-05	4.29647e-05	1.67502e-05	4.56489e-05	0.000116546		116.546	9867.31	42.1834
					989	0.989	1.12024e-05	4.30405e-05	1.67345e-05	4.55908e-05	0.000116568		116.568	9865.47	42.1795
					990	0.99	1.12222e-05	4.31163e-05	1.67189e-05	4.55328e-05	0.00011659		116.59	9863.61	42.1755
					991	0.991	1.12419e-05	4.31922e-05	1.67032e-05	4.5475e-05	0.000116612		116.612	9861.73	42.1715
					992	0.992	1.12617e-05	4.32681e-05	1.66877e-05	4.54173e-05	0.000116635		116.635	9859.84	42.1674
					993	0.993	1.12814e-05	4.33441e-05	1.66721e-05	4.53597e-05	0.000116657		116.657	9857.93	42.1634
					994	0.994	1.13012e-05	4.34201e-05	1.66566e-05	4.53023e-05	0.00011668		116.68	9856.01	42.1592
					995	0.995	1.1321e-05	4.34961e-05	1.66411e-05	4.52449e-05	0.000116703		116.703	9854.06	42.1551
					996	0.996	1.13408e-05	4.35722e-05	1.66256e-05	4.51877e-05	0.000116726		116.726	9852.11	42.1509
					997	0.997	1.13606e-05	4.36484e-05	1.66101e-05	4.51306e-05	0.00011675		116.75	9850.13	42.1467
					998	0.998	1.13805e-05	4.37246e-05	1.65947e-05	4.50736e-05	0.000116773		116.773	9848.14	42.1424
					999	0.999	1.14003e-05	4.38008e-05	1.65793e-05	4.50167e-05	0.000116797		116.797	9846.13	42.1381
					1000	1	1.14202e-05	4.38771e-05	1.65639e-05	4.496e-05	0.000116821		116.821	9844.11	42.1338
					1001	1.001	1.144e-05	4.39534e-05	1.65486e-05	4.49034e-05	0.000116845		116.845	9842.07	42.1294
					1002	1.002	1.14599e-05	4.40298e-05	1.65332e-05	4.48469e-05	0.00011687		116.87	9840.01	42.125
					1003	1.003	1.14798e-05	4.41062e-05	1.65179e-05	4.47905e-05	0.000116894		116.894	9837.94	42.1206
					1004	1.004	1.14997e-05	4.41827e-05	1.65027e-05	4.47342e-05	0.000116919		116.919	9835.85	42.1161
					1005	1.005	1.15196e-05	4.42592e-05	1.64874e-05	4.4678e-05	0.000116944		116.944	9833.74	42.1116
					1006	1.006	1.15396e-05	4.43358e-05	1.64722e-05	4.4622e-05	0.000116969		116.969	9831.62	42.1071
					1007	1.007	1.15595e-05	4.44124e-05	1.6457e-05	4.4566e-05	0.000116995		116.995	9829.49	42.1025
					1008	1.008	1.15794e-05	4.4489e-05	1.64418e-05	4.45102e-05	0.000117021		117.021	9827.34	42.0979
					1009	1.009	1.15994e-05	4.45657e-05	1.64267e-05	4.44545e-05	0.000117046		117.046	9825.17	42.0932
					1010	1.01	1.16194e-05	4.46425e-05	1.64116e-05	4.4399e-05	0.000117072		117.072	9822.98	42.0886
					1011	1.011	1.16394e-05	4.47193e-05	1.63965e-05	4.43435e-05	0.000117099		117.099	9820.78	42.0838
					1012	1.012	1.16594e-05	4.47961e-05	1.63814e-05	4.42881e-05	0.000117125		117.125	9818.57	42.0791
					1013	1.013	1.16794e-05	4.4873e-05	1.63663e-05	4.42329e-05	0.000117152		117.152	9816.34	42.0743
					1014	1.014	1.16994e-05	4.49499e-05	1.63513e-05	4.41778e-05	0.000117178		117.178	9814.09	42.0695
					1015	1.015	1.17194e-05	4.50269e-05	1.63363e-05	4.41227e-05	0.000117205		117.205	9811.83	42.0647
					1016	1.016	1.17395e-05	4.51039e-05	1.63214e-05	4.40678e-05	0.000117233		117.233	9809.56	42.0598
					1017	1.017	1.17595e-05	4.5181e-05	1.63064e-05	4.40131e-05	0.00011726		117.26	9807.27	42.0549
					1018	1.018	1.17796e-05	4.52581e-05	1.62915e-05	4.39584e-05	0.000117288		117.288	9804.96	42.0499
					1019	1.019	1.17997e-05	4.53353e-05	1.62766e-05	4.39038e-05	0.000117315		117.315	9802.64	42.0449
					1020	1.02	1.18198e-05	4.54125e-05	1.62617e-05	4.38494e-05	0.000117343		117.343	9800.3	42.0399
					1021	1.021	1.18399e-05	4.54897e-05	1.62469e-05	4.3795e-05	0.000117372		117.372	9797.95	42.0349
					1022	1.022	1.186e-05	4.5567e-05	1.62321e-05	4.37408e-05	0.0001174		117.4	9795.58	42.0298
					1023	1.023	1.18802e-05	4.56444e-05	1.62173e-05	4.36867e-05	0.000117428		117.428	9793.2	42.0247
					1024	1.024	1.19003e-05	4.57217e-05	1.62025e-05	4.36326e-05	0.000117457		117.457	9790.8	42.0196
					1025	1.025	1.19204e-05	4.57992e-05	1.61877e-05	4.35787e-05	0.000117486		117.486	9788.39	42.0144
					1026	1.026	1.19406e-05	4.58767e-05	1.6173e-05	4.35249e-05	0.000117515		117.515	9785.97	42.0092
					1027	1.027	1.19608e-05	4.59542e-05	1.61583e-05	4.34713e-05	0.000117545		117.545	9783.53	42.0039
					1028	1.028	1.1981e-05	4.60317e-05	1.61436e-05	4.34177e-05	0.000117574		117.574	9781.07	41.9987
					1029	1.029	1.20012e-05	4.61094e-05	1.6129e-05	4.33642e-05	0.000117604		117.604	9778.6	41.9934
					1030	1.03	1.20214e-05	4.6187e-05	1.61143e-05	4.33109e-05	0.000117634		117.634	9776.12	41.988
					1031	1.031	1.20416e-05	4.62647e-05	1.60997e-05	4.32576e-05	0.000117664		117.664	9773.62	41.9827
					1032	1.032	1.20619e-05	4.63425e-05	1.60852e-05	4.32045e-05	0.000117694		117.694	9771.1	41.9773
					1033	1.033	1.20821e-05	4.64203e-05	1.60706e-05	4.31514e-05	0.000117724		117.724	9768.58	41.9718
					1034	1.034	1.21024e-05	4.64981e-05	1.60561e-05	4.30985e-05	0.000117755		117.755	9766.04	41.9664
					1035	1.035	1.21226e-05	4.6576e-05	1.60416e-05	4.30457e-05	0.000117786		117.786	9763.48	41.9609
					1036	1.036	1.21429e-05	4.66539e-05	1.60271e-05	4.2993e-05	0.000117817		117.817	9760.91	41.9554
					1037	1.037	1.21632e-05	4.67319e-05	1.60126e-05	4.29404e-05	0.000117848		117.848	9758.33	41.9498
					1038	1.038	1.21835e-05	4.68099e-05	1.59982e-05	4.28879e-05	0.000117879		117.879	9755.73	41.9442
					1039	1.039	1.22038e-05	4.6888e-05	1.59837e-05	4.28355e-05	0.000117911		117.911	9753.12	41.9386
					1040	1.04	1.22242e-05	4.69661e-05	1.59694e-05	4.27832e-05	0.000117943		117.943	9750.49	41.933
					1041	1.041	1.22445e-05	4.70442e-05	1.5955e-05	4.2731e-05	0.000117975		117.975	9747.85	41.9273
					1042	1.042	1.22649e-05	4.71224e-05	1.59406e-05	4.26789e-05	0.000118007		118.007	9745.2	41.9216
					1043	1.043	1.22852e-05	4.72007e-05	1.59263e-05	4.26269e-05	0.000118039		118.039	9742.53	41.9158
					1044	1.044	1.23056e-05	4.7279e-05	1.5912e-05	4.2575e-05	0.000118072		118.072	9739.85	41.9101
					1045	1.045	1.2326e-05	4.73573e-05	1.58977e-05	4.25233e-05	0.000118104		118.104	9737.16	41.9043
					1046	1.046	1.23464e-05	4.74357e-05	1.58835e-05	4.24716e-05	0.000118137		118.137	9734.45	41.8984
					1047	1.047	1.23668e-05	4.75141e-05	1.58693e-05	4.242e-05	0.00011817		118.17	9731.73	41.8926
					1048	1.048	1.23872e-05	4.75926e-05	1.5855e-05	4.23686e-05	0.000118203		118.203	9728.99	41.8867
					1049	1.049	1.24077e-05	4.76711e-05	1.58409e-05	4.23172e-05	0.000118237		118.237	9726.24	41.8808
					1050	1.05	1.24281e-05	4.77496e-05	1.58267e-05	4.2266e-05	0.00011827		118.27	9723.48	41.8748
					1051	1.051	1.24486e-05	4.78282e-05	1.58126e-05	4.22148e-05	0.000118304		118.304	9720.71	41.8689
					1052	1.052	1.2469e-05	4.79069e-05	1.57984e-05	4.21637e-05	0.000118338		118.338	9717.92	41.8629
					1053	1.053	1.24895e-05	4.79856e-05	1.57844e-05	4.21128e-05	0.000118372		118.372	9715.12	41.8568
					1054	1.054	1.251e-05	4.80643e-05	1.57703e-05	4.20619e-05	0.000118407		118.407	9712.3	41.8508
					1055	1.055	1.25305e-05	4.81431e-05	1.57562e-05	4.20112e-05	0.000118441		118.441	9709.48	41.8447
					1056	1.056	1.2551e-05	4.82219e-05	1.57422e-05	4.19605e-05	0.000118476		118.476	9706.64	41.8386
					1057	1.057	1.25715e-05	4.83007e-05	1.57282e-05	4.191e-05	0.00011851		118.51	9703.78	41.8324
					1058	1.058	1.25921e-05	4.83796e-05	1.57142e-05	4.18595e-05	0.000118545		118.545	9700.92	41.8262
					1059	1.059	1.26126e-05	4.84586e-05	1.57003e-05	4.18092e-05	0.000118581		118.581	9698.04	41.82
					1060	1.06	1.26332e-05	4.85376e-05	1.56863e-05	4.17589e-05	0.000118616		118.616	9695.15	41.8138
					1061	1.061	1.26538e-05	4.86166e-05	1.56724e-05	4.17088e-05	0.000118652		118.652	9692.24	41.8075
					1062	1.062	1.26743e-05	4.86957e-05	1.56585e-05	4.16587e-05	0.000118687		118.687	9689.33	41.8012
					1063	1.063	1.26949e-05	4.87748e-05	1.56446e-05	4.16087e-05	0.000118723		118.723	9686.4	41.7949
					1064	1.064	1.27156e-05	4.8854e-05	1.56308e-05	4.15589e-05	0.000118759		118.759	9683.46	41.7886
					1065	1.065	1.27362e-05	4.89332e-05	1.5617e-05	4.15091e-05	0.000118795		118.795	9680.5	41.7822
					1066	1.066	1.27568e-05	4.90125e-05	1.56032e-05	4.14595e-05	0.000118832		118.832	9677.54	41.7758
					1067	1.067	1.27774e-05	4.90918e-05	1.55894e-05	4.14099e-05	0.000118868		118.868	9674.56	41.7694
					1068	1.068	1.27981e-05	4.91711e-05	1.55756e-05	4.13604e-05	0.000118905		118.905	9671.57	41.7629
					1069	1.069	1.28188e-05	4.92505e-05	1.55619e-05	4.13111e-05	0.000118942		118.942	9668.56	41.7564
					1070	1.07	1.28394e-05	4.93299e-05	1.55482e-05	4.12618e-05	0.000118979		118.979	9665.55	41.7499
					1071	1.071	1.28601e-05	4.94094e-05	1.55345e-05	4.12126e-05	0.000119017		119.017	9662.52	41.7434
					1072	1.072	1.28808e-05	4.94889e-05	1.55208e-05	4.11635e-05	0.000119054		119.054	9659.48	41.7368
					1073	1.073	1.29015e-05	4.95685e-05	1.55071e-05	4.11145e-05	0.000119092		119.092	9656.43	41.7302
					1074	1.074	1.29222e-05	4.96481e-05	1.54935e-05	4.10656e-05	0.000119129		119.129	9653.36	41.7236
					1075	1.075	1.2943e-05	4.97278e-05	1.54799e-05	4.10168e-05	0.000119167		119.167	9650.29	41.7169
					1076	1.076	1.29637e-05	4.98074e-05	1.54663e-05	4.09681e-05	0.000119206		119.206	9647.2	41.7103
					1077	1.077	1.29845e-05	4.98872e-05	1.54527e-05	4.09195e-05	0.000119244		119.244	9644.1	41.7036
					1078	1.078	1.30052e-05	4.9967e-05	1.54392e-05	4.0871e-05	0.000119282		119.282	9640.99	41.6968
					1079	1.079	1.3026e-05	5.00468e-05	1.54257e-05	4.08226e-05	0.000119321		119.321	9637.86	41.6901
					1080	1.08	1.30468e-05	5.01266e-05	1.54122e-05	4.07742e-05	0.00011936		119.36	9634.73	41.6833
					1081	1.081	1.30676e-05	5.02066e-05	1.53987e-05	4.0726e-05	0.000119399		119.399	9631.58	41.6765
					1082	1.082	1.30884e-05	5.02865e-05	1.53852e-05	4.06779e-05	0.000119438		119.438	9628.43	41.6697
					1083	1.083	1.31092e-05	5.03665e-05	1.53718e-05	4.06298e-05	0.000119477		119.477	9625.26	41.6628
					1084	1.084	1.313e-05	5.04465e-05	1.53584e-05	4.05819e-05	0.000119517		119.517	9622.08	41.6559
					1085	1.085	1.31509e-05	5.05266e-05	1.5345e-05	4.0534e-05	0.000119556		119.556	9618.88	41.649
					1086	1.086	1.31717e-05	5.06067e-05	1.53316e-05	4.04862e-05	0.000119596		119.596	9615.68	41.6421
					1087	1.087	1.31926e-05	5.06869e-05	1.53182e-05	4.04386e-05	0.000119636		119.636	9612.47	41.6351
					1088	1.088	1.32135e-05	5.07671e-05	1.53049e-05	4.0391e-05	0.000119676		119.676	9609.24	41.6281
					1089	1.089	1.32344e-05	5.08474e-05	1.52916e-05	4.03435e-05	0.000119717		119.717	9606	41.6211
					1090	1.09	1.32553e-05	5.09276e-05	1.52783e-05	4.02961e-05	0.000119757		119.757	9602.76	41.6141
					1091	1.091	1.32762e-05	5.1008e-05	1.5265e-05	4.02488e-05	0.000119798		119.798	9599.5	41.607
					1092	1.092	1.32971e-05	5.10884e-05	1.52518e-05	4.02015e-05	0.000119839		119.839	9596.23	41.5999
					1093	1.093	1.3318e-05	5.11688e-05	1.52385e-05	4.01544e-05	0.00011988		119.88	9592.95	41.5928
					1094	1.094	1.3339e-05	5.12492e-05	1.52253e-05	4.01074e-05	0.000119921		119.921	9589.65	41.5857
					1095	1.095	1.33599e-05	5.13297e-05	1.52121e-05	4.00604e-05	0.000119962		119.962	9586.35	41.5785
					1096	1.096	1.33809e-05	5.14103e-05	1.5199e-05	4.00135e-05	0.000120004		120.004	9583.04	41.5713
					1097	1.097	1.34019e-05	5.14909e-05	1.51858e-05	3.99668e-05	0.000120045		120.045	9579.71	41.5641
					1098	1.098	1.34229e-05	5.15715e-05	1.51727e-05	3.99201e-05	0.000120087		120.087	9576.38	41.5569
					1099	1.099	1.34439e-05	5.16522e-05	1.51596e-05	3.98735e-05	0.000120129		120.129	9573.03	41.5496
					1100	1.1	1.34649e-05	5.17329e-05	1.51465e-05	3.9827e-05	0.000120171		120.171	9569.68	41.5423
					1101	1.101	1.34859e-05	5.18137e-05	1.51334e-05	3.97806e-05	0.000120214		120.214	9566.31	41.535
					1102	1.102	1.35069e-05	5.18945e-05	1.51204e-05	3.97342e-05	0.000120256		120.256	9562.93	41.5277
					1103	1.103	1.3528e-05	5.19753e-05	1.51073e-05	3.9688e-05	0.000120299		120.299	9559.55	41.5203
					1104	1.104	1.3549e-05	5.20562e-05	1.50943e-05	3.96418e-05	0.000120341		120.341	9556.15	41.513
					1105	1.105	1.35701e-05	5.21371e-05	1.50813e-05	3.95958e-05	0.000120384		120.384	9552.74	41.5056
					1106	1.106	1.35911e-05	5.22181e-05	1.50684e-05	3.95498e-05	0.000120427		120.427	9549.32	41.4981
					1107	1.107	1.36122e-05	5.22991e-05	1.50554e-05	3.95039e-05	0.000120471		120.471	9545.89	41.4907
					1108	1.108	1.36333e-05	5.23802e-05	1.50425e-05	3.94581e-05	0.000120514		120.514	9542.46	41.4832
					1109	1.109	1.36544e-05	5.24613e-05	1.50296e-05	3.94124e-05	0.000120558		120.558	9539.01	41.4757
					1110	1.11	1.36755e-05	5.25424e-05	1.50167e-05	3.93667e-05	0.000120601		120.601	9535.55	41.4682
					1111	1.111	1.36967e-05	5.26236e-05	1.50038e-05	3.93212e-05	0.000120645		120.645	9532.08	41.4606
					1112	1.112	1.37178e-05	5.27048e-05	1.4991e-05	3.92757e-05	0.000120689		120.689	9528.6	41.4531
					1113	1.113	1.3739e-05	5.27861e-05	1.49781e-05	3.92304e-05	0.000120734		120.734	9525.11	41.4455
					1114	1.114	1.37601e-05	5.28674e-05	1.49653e-05	3.91851e-05	0.000120778		120.778	9521.61	41.4379
					1115	1.115	1.37813e-05	5.29487e-05	1.49525e-05	3.91399e-05	0.000120822		120.822	9518.1	41.4302
					1116	1.116	1.38025e-05	5.30301e-05	1.49397e-05	3.90947e-05	0.000120867		120.867	9514.58	41.4226
					1117	1.117	1.38237e-05	5.31115e-05	1.4927e-05	3.90497e-05	0.000120912		120.912	9511.06	41.4149
					1118	1.118	1.38449e-05	5.3193e-05	1.49143e-05	3.90048e-05	0.000120957		120.957	9507.52	41.4072
					1119	1.119	1.38661e-05	5.32745e-05	1.49015e-05	3.89599e-05	0.000121002		121.002	9503.97	41.3995
					1120	1.12	1.38873e-05	5.33561e-05	1.48888e-05	3.89151e-05	0.000121047		121.047	9500.42	41.3917
					1121	1.121	1.39086e-05	5.34377e-05	1.48762e-05	3.88704e-05	0.000121093		121.093	9496.85	41.384
					1122	1.122	1.39298e-05	5.35193e-05	1.48635e-05	3.88258e-05	0.000121138		121.138	9493.27	41.3762
					1123	1.123	1.39511e-05	5.3601e-05	1.48509e-05	3.87813e-05	0.000121184		121.184	9489.69	41.3684
					1124	1.124	1.39723e-05	5.36827e-05	1.48382e-05	3.87368e-05	0.00012123		121.23	9486.09	41.3605
					1125	1.125	1.39936e-05	5.37644e-05	1.48256e-05	3.86924e-05	0.000121276		121.276	9482.49	41.3527
					1126	1.126	1.40149e-05	5.38462e-05	1.48131e-05	3.86482e-05	0.000121322		121.322	9478.88	41.3448
					1127	1.127	1.40362e-05	5.39281e-05	1.48005e-05	3.8604e-05	0.000121369		121.369	9475.25	41.3369
					1128	1.128	1.40575e-05	5.401e-05	1.4788e-05	3.85598e-05	0.000121415		121.415	9471.62	41.329
					1129	1.129	1.40788e-05	5.40919e-05	1.47754e-05	3.85158e-05	0.000121462		121.462	9467.98	41.321
					1130	1.13	1.41002e-05	5.41739e-05	1.47629e-05	3.84719e-05	0.000121509		121.509	9464.33	41.3131
					1131	1.131	1.41215e-05	5.42559e-05	1.47504e-05	3.8428e-05	0.000121556		121.556	9460.67	41.3051
					1132	1.132	1.41429e-05	5.43379e-05	1.4738e-05	3.83842e-05	0.000121603		121.603	9457.01	41.2971
					1133	1.133	1.41642e-05	5.442e-05	1.47255e-05	3.83405e-05	0.00012165		121.65	9453.33	41.289
					1134	1.134	1.41856e-05	5.45021e-05	1.47131e-05	3.82968e-05	0.000121698		121.698	9449.64	41.281
					1135	1.135	1.4207e-05	5.45843e-05	1.47007e-05	3.82533e-05	0.000121745		121.745	9445.95	41.2729
					1136	1.136	1.42284e-05	5.46665e-05	1.46883e-05	3.82098e-05	0.000121793		121.793	9442.25	41.2648
					1137	1.137	1.42498e-05	5.47488e-05	1.46759e-05	3.81664e-05	0.000121841		121.841	9438.54	41.2567
					1138	1.138	1.42712e-05	5.48311e-05	1.46636e-05	3.81231e-05	0.000121889		121.889	9434.82	41.2486
					1139	1.139	1.42927e-05	5.49134e-05	1.46512e-05	3.80799e-05	0.000121937		121.937	9431.09	41.2404
					1140	1.14	1.43141e-05	5.49958e-05	1.46389e-05	3.80367e-05	0.000121986		121.986	9427.35	41.2323
					1141	1.141	1.43356e-05	5.50782e-05	1.46266e-05	3.79937e-05	0.000122034		122.034	9423.6	41.2241
					1142	1.142	1.4357e-05	5.51606e-05	1.46143e-05	3.79507e-05	0.000122083		122.083	9419.85	41.2158
					1143	1.143	1.43785e-05	5.52431e-05	1.4602e-05	3.79078e-05	0.000122131		122.131	9416.08	41.2076
					1144	1.144	1.44e-05	5.53257e-05	1.45898e-05	3.78649e-05	0.00012218		122.18	9412.31	41.1994
					1145	1.145	1.44215e-05	5.54082e-05	1.45776e-05	3.78222e-05	0.000122229		122.229	9408.53	41.1911
					1146	1.146	1.4443e-05	5.54909e-05	1.45654e-05	3.77795e-05	0.000122279		122.279	9404.75	41.1828
					1147	1.147	1.44645e-05	5.55735e-05	1.45532e-05	3.77369e-05	0.000122328		122.328	9400.95	41.1745
					1148	1.148	1.4486e-05	5.56562e-05	1.4541e-05	3.76944e-05	0.000122378		122.378	9397.14	41.1661
					1149	1.149	1.45075e-05	5.5739e-05	1.45288e-05	3.76519e-05	0.000122427		122.427	9393.33	41.1578
					1150	1.15	1.45291e-05	5.58217e-05	1.45167e-05	3.76096e-05	0.000122477		122.477	9389.51	41.1494
					1151	1.151	1.45506e-05	5.59046e-05	1.45046e-05	3.75673e-05	0.000122527		122.527	9385.68	41.141
					1152	1.152	1.45722e-05	5.59874e-05	1.44925e-05	3.75251e-05	0.000122577		122.577	9381.84	41.1326
					1153	1.153	1.45938e-05	5.60703e-05	1.44804e-05	3.74829e-05	0.000122627		122.627	9378	41.1242
					1154	1.154	1.46154e-05	5.61533e-05	1.44683e-05	3.74409e-05	0.000122678		122.678	9374.15	41.1157
					1155	1.155	1.4637e-05	5.62362e-05	1.44563e-05	3.73989e-05	0.000122728		122.728	9370.29	41.1073
					1156	1.156	1.46586e-05	5.63193e-05	1.44442e-05	3.7357e-05	0.000122779		122.779	9366.42	41.0988
					1157	1.157	1.46802e-05	5.64023e-05	1.44322e-05	3.73152e-05	0.00012283		122.83	9362.54	41.0903
					1158	1.158	1.47018e-05	5.64854e-05	1.44202e-05	3.72734e-05	0.000122881		122.881	9358.66	41.0818
					1159	1.159	1.47235e-05	5.65685e-05	1.44082e-05	3.72317e-05	0.000122932		122.932	9354.77	41.0732
					1160	1.16	1.47451e-05	5.66517e-05	1.43963e-05	3.71901e-05	0.000122983		122.983	9350.87	41.0647
					1161	1.161	1.47668e-05	5.67349e-05	1.43843e-05	3.71486e-05	0.000123035		123.035	9346.96	41.0561
					1162	1.162	1.47884e-05	5.68182e-05	1.43724e-05	3.71072e-05	0.000123086		123.086	9343.04	41.0475
					1163	1.163	1.48101e-05	5.69015e-05	1.43605e-05	3.70658e-05	0.000123138		123.138	9339.12	41.0389
					1164	1.164	1.48318e-05	5.69848e-05	1.43486e-05	3.70245e-05	0.00012319		123.19	9335.19	41.0302
					1165	1.165	1.48535e-05	5.70682e-05	1.43367e-05	3.69833e-05	0.000123242		123.242	9331.25	41.0216
					1166	1.166	1.48752e-05	5.71516e-05	1.43249e-05	3.69421e-05	0.000123294		123.294	9327.31	41.0129
					1167	1.167	1.48969e-05	5.72351e-05	1.4313e-05	3.6901e-05	0.000123346		123.346	9323.36	41.0042
					1168	1.168	1.49187e-05	5.73186e-05	1.43012e-05	3.686e-05	0.000123399		123.399	9319.4	40.9955
					1169	1.169	1.49404e-05	5.74021e-05	1.42894e-05	3.68191e-05	0.000123451		123.451	9315.43	40.9868
					1170	1.17	1.49622e-05	5.74857e-05	1.42776e-05	3.67782e-05	0.000123504		123.504	9311.46	40.978
					1171	1.171	1.49839e-05	5.75693e-05	1.42659e-05	3.67374e-05	0.000123557		123.557	9307.48	40.9693
					1172	1.172	1.50057e-05	5.7653e-05	1.42541e-05	3.66967e-05	0.00012361		123.61	9303.49	40.9605
					1173	1.173	1.50275e-05	5.77367e-05	1.42424e-05	3.66561e-05	0.000123663		123.663	9299.49	40.9517
					1174	1.174	1.50493e-05	5.78204e-05	1.42306e-05	3.66155e-05	0.000123716		123.716	9295.49	40.9429
					1175	1.175	1.50711e-05	5.79042e-05	1.42189e-05	3.6575e-05	0.000123769		123.769	9291.48	40.9341
					1176	1.176	1.50929e-05	5.7988e-05	1.42073e-05	3.65346e-05	0.000123823		123.823	9287.47	40.9252
					1177	1.177	1.51147e-05	5.80718e-05	1.41956e-05	3.64943e-05	0.000123876		123.876	9283.44	40.9163
					1178	1.178	1.51366e-05	5.81557e-05	1.41839e-05	3.6454e-05	0.00012393		123.93	9279.41	40.9075
					1179	1.179	1.51584e-05	5.82397e-05	1.41723e-05	3.64138e-05	0.000123984		123.984	9275.38	40.8986
					1180	1.18	1.51803e-05	5.83236e-05	1.41607e-05	3.63737e-05	0.000124038		124.038	9271.33	40.8897
					1181	1.181	1.52021e-05	5.84076e-05	1.41491e-05	3.63336e-05	0.000124092		124.092	9267.28	40.8807
					1182	1.182	1.5224e-05	5.84917e-05	1.41375e-05	3.62936e-05	0.000124147		124.147	9263.23	40.8718
					1183	1.183	1.52459e-05	5.85758e-05	1.41259e-05	3.62537e-05	0.000124201		124.201	9259.16	40.8628
					1184	1.184	1.52678e-05	5.86599e-05	1.41144e-05	3.62138e-05	0.000124256		124.256	9255.09	40.8538
					1185	1.185	1.52897e-05	5.8744e-05	1.41028e-05	3.61741e-05	0.000124311		124.311	9251.02	40.8448
					1186	1.186	1.53116e-05	5.88282e-05	1.40913e-05	3.61344e-05	0.000124366		124.366	9246.93	40.8358
					1187	1.187	1.53335e-05	5.89125e-05	1.40798e-05	3.60947e-05	0.000124421		124.421	9242.84	40.8268
					1188	1.188	1.53555e-05	5.89968e-05	1.40683e-05	3.60552e-05	0.000124476		124.476	9238.75	40.8177
					1189	1.189	1.53774e-05	5.90811e-05	1.40569e-05	3.60157e-05	0.000124531		124.531	9234.64	40.8087
					1190	1.19	1.53994e-05	5.91654e-05	1.40454e-05	3.59762e-05	0.000124586		124.586	9230.54	40.7996
					1191	1.191	1.54213e-05	5.92498e-05	1.4034e-05	3.59369e-05	0.000124642		124.642	9226.42	40.7905
					1192	1.192	1.54433e-05	5.93343e-05	1.40226e-05	3.58976e-05	0.000124698		124.698	9222.3	40.7814
					1193	1.193	1.54653e-05	5.94187e-05	1.40112e-05	3.58584e-05	0.000124754		124.754	9218.17	40.7722
					1194	1.194	1.54873e-05	5.95033e-05	1.39998e-05	3.58192e-05	0.00012481		124.81	9214.04	40.7631
					1195	1.195	1.55093e-05	5.95878e-05	1.39884e-05	3.57802e-05	0.000124866		124.866	9209.9	40.7539
					1196	1.196	1.55313e-05	5.96724e-05	1.39771e-05	3.57412e-05	0.000124922		124.922	9205.75	40.7448
					1197	1.197	1.55533e-05	5.9757e-05	1.39657e-05	3.57022e-05	0.000124978		124.978	9201.6	40.7356
					1198	1.198	1.55754e-05	5.98417e-05	1.39544e-05	3.56633e-05	0.000125035		125.035	9197.44	40.7264
					1199	1.199	1.55974e-05	5.99264e-05	1.39431e-05	3.56245e-05	0.000125091		125.091	9193.27	40.7172
					1200	1.2	1.56195e-05	6.00111e-05	1.39318e-05	3.55858e-05	0.000125148		125.148	9189.1	40.7079
					1201	1.201	1.56416e-05	6.00959e-05	1.39205e-05	3.55471e-05	0.000125205		125.205	9184.93	40.6987
					1202	1.202	1.56636e-05	6.01807e-05	1.39093e-05	3.55085e-05	0.000125262		125.262	9180.75	40.6894
					1203	1.203	1.56857e-05	6.02656e-05	1.3898e-05	3.547e-05	0.000125319		125.319	9176.56	40.6801
					1204	1.204	1.57078e-05	6.03505e-05	1.38868e-05	3.54315e-05	0.000125377		125.377	9172.36	40.6708
					1205	1.205	1.57299e-05	6.04354e-05	1.38756e-05	3.53931e-05	0.000125434		125.434	9168.16	40.6615
					1206	1.206	1.5752e-05	6.05204e-05	1.38644e-05	3.53548e-05	0.000125492		125.492	9163.96	40.6522
					1207	1.207	1.57742e-05	6.06054e-05	1.38532e-05	3.53165e-05	0.000125549		125.549	9159.75	40.6428
					1208	1.208	1.57963e-05	6.06905e-05	1.38421e-05	3.52783e-05	0.000125607		125.607	9155.53	40.6335
					1209	1.209	1.58184e-05	6.07755e-05	1.38309e-05	3.52402e-05	0.000125665		125.665	9151.31	40.6241
					1210	1.21	1.58406e-05	6.08607e-05	1.38198e-05	3.52021e-05	0.000125723		125.723	9147.08	40.6147
					1211	1.211	1.58628e-05	6.09458e-05	1.38087e-05	3.51641e-05	0.000125781		125.781	9142.85	40.6053
					1212	1.212	1.58849e-05	6.1031e-05	1.37976e-05	3.51262e-05	0.00012584		125.84	9138.61	40.5959
					1213	1.213	1.59071e-05	6.11163e-05	1.37865e-05	3.50884e-05	0.000125898		125.898	9134.36	40.5865
					1214	1.214	1.59293e-05	6.12015e-05	1.37754e-05	3.50506e-05	0.000125957		125.957	9130.11	40.577
					1215	1.215	1.59515e-05	6.12868e-05	1.37644e-05	3.50128e-05	0.000126016		126.016	9125.86	40.5676
					1216	1.216	1.59737e-05	6.13722e-05	1.37533e-05	3.49751e-05	0.000126074		126.074	9121.6	40.5581
					1217	1.217	1.5996e-05	6.14576e-05	1.37423e-05	3.49375e-05	0.000126133		126.133	9117.33	40.5486
					1218	1.218	1.60182e-05	6.1543e-05	1.37313e-05	3.49e-05	0.000126193		126.193	9113.06	40.5391
					1219	1.219	1.60404e-05	6.16285e-05	1.37203e-05	3.48625e-05	0.000126252		126.252	9108.78	40.5296
					1220	1.22	1.60627e-05	6.1714e-05	1.37093e-05	3.48251e-05	0.000126311		126.311	9104.5	40.5201
					1221	1.221	1.6085e-05	6.17995e-05	1.36984e-05	3.47878e-05	0.000126371		126.371	9100.22	40.5106
					1222	1.222	1.61072e-05	6.18851e-05	1.36874e-05	3.47505e-05	0.00012643		126.43	9095.92	40.501
					1223	1.223	1.61295e-05	6.19707e-05	1.36765e-05	3.47133e-05	0.00012649		126.49	9091.63	40.4914
					1224	1.224	1.61518e-05	6.20564e-05	1.36656e-05	3.46761e-05	0.00012655		126.55	9087.33	40.4818
					1225	1.225	1.61741e-05	6.2142e-05	1.36547e-05	3.4639e-05	0.00012661		126.61	9083.02	40.4723
					1226	1.226	1.61964e-05	6.22278e-05	1.36438e-05	3.4602e-05	0.00012667		126.67	9078.71	40.4626
					1227	1.227	1.62187e-05	6.23135e-05	1.36329e-05	3.45651e-05	0.00012673		126.73	9074.39	40.453
					1228	1.228	1.62411e-05	6.23993e-05	1.36221e-05	3.45282e-05	0.000126791		126.791	9070.07	40.4434
					1229	1.229	1.62634e-05	6.24852e-05	1.36112e-05	3.44913e-05	0.000126851		126.851	9065.74	40.4337
					1230	1.23	1.62858e-05	6.25711e-05	1.36004e-05	3.44546e-05	0.000126912		126.912	9061.41	40.4241
					1231	1.231	1.63081e-05	6.2657e-05	1.35896e-05	3.44179e-05	0.000126973		126.973	9057.08	40.4144
					1232	1.232	1.63305e-05	6.27429e-05	1.35788e-05	3.43812e-05	0.000127033		127.033	9052.73	40.4047
					1233	1.233	1.63529e-05	6.28289e-05	1.3568e-05	3.43446e-05	0.000127094		127.094	9048.39	40.395
					1234	1.234	1.63753e-05	6.29149e-05	1.35573e-05	3.43081e-05	0.000127156		127.156	9044.04	40.3853
					1235	1.235	1.63977e-05	6.3001e-05	1.35465e-05	3.42717e-05	0.000127217		127.217	9039.68	40.3756
					1236	1.236	1.64201e-05	6.30871e-05	1.35358e-05	3.42353e-05	0.000127278		127.278	9035.33	40.3659
					1237	1.237	1.64425e-05	6.31732e-05	1.35251e-05	3.41989e-05	0.00012734		127.34	9030.96	40.3561
					1238	1.238	1.64649e-05	6.32594e-05	1.35144e-05	3.41627e-05	0.000127401		127.401	9026.59	40.3463
					1239	1.239	1.64874e-05	6.33456e-05	1.35037e-05	3.41265e-05	0.000127463		127.463	9022.22	40.3366
					1240	1.24	1.65098e-05	6.34318e-05	1.3493e-05	3.40903e-05	0.000127525		127.525	9017.84	40.3268
					1241	1.241	1.65323e-05	6.35181e-05	1.34823e-05	3.40542e-05	0.000127587		127.587	9013.46	40.317
					1242	1.242	1.65547e-05	6.36045e-05	1.34717e-05	3.40182e-05	0.000127649		127.649	9009.07	40.3072
					1243	1.243	1.65772e-05	6.36908e-05	1.34611e-05	3.39822e-05	0.000127711		127.711	9004.68	40.2974
					1244	1.244	1.65997e-05	6.37772e-05	1.34504e-05	3.39463e-05	0.000127774		127.774	9000.29	40.2875
					1245	1.245	1.66222e-05	6.38636e-05	1.34398e-05	3.39105e-05	0.000127836		127.836	8995.89	40.2777
					1246	1.246	1.66447e-05	6.39501e-05	1.34292e-05	3.38747e-05	0.000127899		127.899	8991.49	40.2678
					1247	1.247	1.66672e-05	6.40366e-05	1.34187e-05	3.3839e-05	0.000127961		127.961	8987.08	40.2579
					1248	1.248	1.66897e-05	6.41231e-05	1.34081e-05	3.38033e-05	0.000128024		128.024	8982.67	40.2481
					1249	1.249	1.67123e-05	6.42097e-05	1.33976e-05	3.37677e-05	0.000128087		128.087	8978.25	40.2382
					1250	1.25	1.67348e-05	6.42963e-05	1.3387e-05	3.37322e-05	0.00012815		128.15	8973.83	40.2283
					1251	1.251	1.67574e-05	6.4383e-05	1.33765e-05	3.36967e-05	0.000128214		128.214	8969.41	40.2183
					1252	1.252	1.67799e-05	6.44697e-05	1.3366e-05	3.36613e-05	0.000128277		128.277	8964.98	40.2084
					1253	1.253	1.68025e-05	6.45564e-05	1.33555e-05	3.3626e-05	0.00012834		128.34	8960.55	40.1985
					1254	1.254	1.68251e-05	6.46431e-05	1.33451e-05	3.35907e-05	0.000128404		128.404	8956.11	40.1885
					1255	1.255	1.68477e-05	6.47299e-05	1.33346e-05	3.35554e-05	0.000128468		128.468	8951.67	40.1786
					1256	1.256	1.68703e-05	6.48168e-05	1.33242e-05	3.35202e-05	0.000128531		128.531	8947.23	40.1686
					1257	1.257	1.68929e-05	6.49036e-05	1.33137e-05	3.34851e-05	0.000128595		128.595	8942.78	40.1586
					1258	1.258	1.69155e-05	6.49905e-05	1.33033e-05	3.34501e-05	0.000128659		128.659	8938.33	40.1486
					1259	1.259	1.69381e-05	6.50775e-05	1.32929e-05	3.34151e-05	0.000128724		128.724	8933.87	40.1386
					1260	1.26	1.69608e-05	6.51645e-05	1.32825e-05	3.33801e-05	0.000128788		128.788	8929.41	40.1286
					1261	1.261	1.69834e-05	6.52515e-05	1.32722e-05	3.33452e-05	0.000128852		128.852	8924.95	40.1185
					1262	1.262	1.70061e-05	6.53385e-05	1.32618e-05	3.33104e-05	0.000128917		128.917	8920.48	40.1085
					1263	1.263	1.70287e-05	6.54256e-05	1.32515e-05	3.32756e-05	0.000128981		128.981	8916.01	40.0985
					1264	1.264	1.70514e-05	6.55127e-05	1.32411e-05	3.32409e-05	0.000129046		129.046	8911.54	40.0884
					1265	1.265	1.70741e-05	6.55999e-05	1.32308e-05	3.32063e-05	0.000129111		129.111	8907.06	40.0783
					1266	1.266	1.70968e-05	6.56871e-05	1.32205e-05	3.31717e-05	0.000129176		129.176	8902.58	40.0682
					1267	1.267	1.71195e-05	6.57743e-05	1.32102e-05	3.31371e-05	0.000129241		129.241	8898.09	40.0581
					1268	1.268	1.71422e-05	6.58616e-05	1.32e-05	3.31027e-05	0.000129306		129.306	8893.61	40.048
					1269	1.269	1.71649e-05	6.59489e-05	1.31897e-05	3.30682e-05	0.000129372		129.372	8889.11	40.0379
					1270	1.27	1.71877e-05	6.60362e-05	1.31795e-05	3.30339e-05	0.000129437		129.437	8884.62	40.0278
					1271	1.271	1.72104e-05	6.61236e-05	1.31692e-05	3.29996e-05	0.000129503		129.503	8880.12	40.0177
					1272	1.272	1.72332e-05	6.6211e-05	1.3159e-05	3.29653e-05	0.000129568		129.568	8875.62	40.0075
					1273	1.273	1.72559e-05	6.62984e-05	1.31488e-05	3.29311e-05	0.000129634		129.634	8871.11	39.9974
					1274	1.274	1.72787e-05	6.63859e-05	1.31386e-05	3.2897e-05	0.0001297		129.7	8866.6	39.9872
					1275	1.275	1.73015e-05	6.64734e-05	1.31284e-05	3.28629e-05	0.000129766		129.766	8862.09	39.977
					1276	1.276	1.73243e-05	6.6561e-05	1.31183e-05	3.28289e-05	0.000129832		129.832	8857.58	39.9668
					1277	1.277	1.7347e-05	6.66485e-05	1.31081e-05	3.27949e-05	0.000129899		129.899	8853.06	39.9566
					1278	1.278	1.73699e-05	6.67362e-05	1.3098e-05	3.2761e-05	0.000129965		129.965	8848.54	39.9464
					1279	1.279	1.73927e-05	6.68238e-05	1.30879e-05	3.27272e-05	0.000130031		130.031	8844.01	39.9362
					1280	1.28	1.74155e-05	6.69115e-05	1.30777e-05	3.26934e-05	0.000130098		130.098	8839.48	39.926
					1281	1.281	1.74383e-05	6.69992e-05	1.30676e-05	3.26596e-05	0.000130165		130.165	8834.95	39.9158
					1282	1.282	1.74612e-05	6.7087e-05	1.30576e-05	3.26259e-05	0.000130232		130.232	8830.42	39.9055
					1283	1.283	1.7484e-05	6.71748e-05	1.30475e-05	3.25923e-05	0.000130299		130.299	8825.88	39.8953
					1284	1.284	1.75069e-05	6.72626e-05	1.30374e-05	3.25587e-05	0.000130366		130.366	8821.34	39.885
					1285	1.285	1.75297e-05	6.73505e-05	1.30274e-05	3.25252e-05	0.000130433		130.433	8816.8	39.8747
					1286	1.286	1.75526e-05	6.74384e-05	1.30174e-05	3.24917e-05	0.0001305		130.5	8812.25	39.8644
					1287	1.287	1.75755e-05	6.75263e-05	1.30074e-05	3.24583e-05	0.000130568		130.568	8807.7	39.8542
					1288	1.288	1.75984e-05	6.76143e-05	1.29974e-05	3.2425e-05	0.000130635		130.635	8803.15	39.8439
					1289	1.289	1.76213e-05	6.77023e-05	1.29874e-05	3.23917e-05	0.000130703		130.703	8798.6	39.8335
					1290	1.29	1.76442e-05	6.77904e-05	1.29774e-05	3.23584e-05	0.00013077		130.77	8794.04	39.8232
					1291	1.291	1.76672e-05	6.78784e-05	1.29674e-05	3.23252e-05	0.000130838		130.838	8789.48	39.8129
					1292	1.292	1.76901e-05	6.79666e-05	1.29575e-05	3.22921e-05	0.000130906		130.906	8784.91	39.8026
					1293	1.293	1.7713e-05	6.80547e-05	1.29475e-05	3.2259e-05	0.000130974		130.974	8780.35	39.7922
					1294	1.294	1.7736e-05	6.81429e-05	1.29376e-05	3.2226e-05	0.000131042		131.042	8775.78	39.7819
					1295	1.295	1.7759e-05	6.82311e-05	1.29277e-05	3.2193e-05	0.000131111		131.111	8771.21	39.7715
					1296	1.296	1.77819e-05	6.83194e-05	1.29178e-05	3.21601e-05	0.000131179		131.179	8766.63	39.7611
					1297	1.297	1.78049e-05	6.84076e-05	1.29079e-05	3.21272e-05	0.000131248		131.248	8762.06	39.7507
					1298	1.298	1.78279e-05	6.8496e-05	1.28981e-05	3.20944e-05	0.000131316		131.316	8757.48	39.7404
					1299	1.299	1.78509e-05	6.85843e-05	1.28882e-05	3.20617e-05	0.000131385		131.385	8752.9	39.73
					1300	1.3	1.78739e-05	6.86727e-05	1.28784e-05	3.2029e-05	0.000131454		131.454	8748.31	39.7196
					1301	1.301	1.78969e-05	6.87612e-05	1.28685e-05	3.19963e-05	0.000131523		131.523	8743.72	39.7091
					1302	1.302	1.79199e-05	6.88496e-05	1.28587e-05	3.19637e-05	0.000131592		131.592	8739.14	39.6987
					1303	1.303	1.7943e-05	6.89381e-05	1.28489e-05	3.19312e-05	0.000131661		131.661	8734.54	39.6883
					1304	1.304	1.7966e-05	6.90266e-05	1.28391e-05	3.18987e-05	0.00013173		131.73	8729.95	39.6778
					1305	1.305	1.79891e-05	6.91152e-05	1.28293e-05	3.18662e-05	0.0001318		131.8	8725.35	39.6674
					1306	1.306	1.80121e-05	6.92038e-05	1.28196e-05	3.18338e-05	0.000131869		131.869	8720.75	39.6569
					1307	1.307	1.80352e-05	6.92924e-05	1.28098e-05	3.18015e-05	0.000131939		131.939	8716.15	39.6465
					1308	1.308	1.80583e-05	6.93811e-05	1.28001e-05	3.17692e-05	0.000132009		132.009	8711.55	39.636
					1309	1.309	1.80814e-05	6.94698e-05	1.27903e-05	3.1737e-05	0.000132079		132.079	8706.94	39.6255
					1310	1.31	1.81045e-05	6.95586e-05	1.27806e-05	3.17048e-05	0.000132148		132.148	8702.33	39.615
					1311	1.311	1.81276e-05	6.96473e-05	1.27709e-05	3.16727e-05	0.000132219		132.219	8697.72	39.6045
					1312	1.312	1.81507e-05	6.97361e-05	1.27612e-05	3.16406e-05	0.000132289		132.289	8693.11	39.594
					1313	1.313	1.81738e-05	6.9825e-05	1.27516e-05	3.16086e-05	0.000132359		132.359	8688.5	39.5835
					1314	1.314	1.81969e-05	6.99139e-05	1.27419e-05	3.15766e-05	0.000132429		132.429	8683.88	39.573
					1315	1.315	1.82201e-05	7.00028e-05	1.27322e-05	3.15447e-05	0.0001325		132.5	8679.26	39.5625
					1316	1.316	1.82432e-05	7.00917e-05	1.27226e-05	3.15128e-05	0.00013257		132.57	8674.64	39.552
					1317	1.317	1.82664e-05	7.01807e-05	1.2713e-05	3.1481e-05	0.000132641		132.641	8670.01	39.5414
					1318	1.318	1.82896e-05	7.02697e-05	1.27034e-05	3.14493e-05	0.000132712		132.712	8665.39	39.5309
					1319	1.319	1.83127e-05	7.03587e-05	1.26938e-05	3.14175e-05	0.000132783		132.783	8660.76	39.5203
					1320	1.32	1.83359e-05	7.04478e-05	1.26842e-05	3.13859e-05	0.000132854		132.854	8656.13	39.5097
					1321	1.321	1.83591e-05	7.05369e-05	1.26746e-05	3.13543e-05	0.000132925		132.925	8651.5	39.4992
					1322	1.322	1.83823e-05	7.06261e-05	1.2665e-05	3.13227e-05	0.000132996		132.996	8646.87	39.4886
					1323	1.323	1.84055e-05	7.07153e-05	1.26555e-05	3.12912e-05	0.000133067		133.067	8642.23	39.478
					1324	1.324	1.84287e-05	7.08045e-05	1.26459e-05	3.12597e-05	0.000133139		133.139	8637.59	39.4674
					1325	1.325	1.8452e-05	7.08937e-05	1.26364e-05	3.12283e-05	0.00013321		133.21	8632.95	39.4568
					1326	1.326	1.84752e-05	7.0983e-05	1.26269e-05	3.1197e-05	0.000133282		133.282	8628.31	39.4462
					1327	1.327	1.84985e-05	7.10723e-05	1.26174e-05	3.11657e-05	0.000133354		133.354	8623.67	39.4356
					1328	1.328	1.85217e-05	7.11617e-05	1.26079e-05	3.11344e-05	0.000133426		133.426	8619.03	39.425
					1329	1.329	1.8545e-05	7.12511e-05	1.25984e-05	3.11032e-05	0.000133498		133.498	8614.38	39.4143
					1330	1.33	1.85683e-05	7.13405e-05	1.2589e-05	3.1072e-05	0.00013357		133.57	8609.73	39.4037
					1331	1.331	1.85915e-05	7.143e-05	1.25795e-05	3.10409e-05	0.000133642		133.642	8605.08	39.3931
					1332	1.332	1.86148e-05	7.15194e-05	1.25701e-05	3.10099e-05	0.000133714		133.714	8600.43	39.3824
					1333	1.333	1.86381e-05	7.1609e-05	1.25607e-05	3.09789e-05	0.000133787		133.787	8595.78	39.3718
					1334	1.334	1.86614e-05	7.16985e-05	1.25512e-05	3.09479e-05	0.000133859		133.859	8591.12	39.3611
					1335	1.335	1.86848e-05	7.17881e-05	1.25418e-05	3.0917e-05	0.000133932		133.932	8586.47	39.3504
					1336	1.336	1.87081e-05	7.18777e-05	1.25324e-05	3.08861e-05	0.000134004		134.004	8581.81	39.3398
					1337	1.337	1.87314e-05	7.19674e-05	1.25231e-05	3.08553e-05	0.000134077		134.077	8577.15	39.3291
					1338	1.338	1.87548e-05	7.20571e-05	1.25137e-05	3.08246e-05	0.00013415		134.15	8572.49	39.3184
					1339	1.339	1.87781e-05	7.21468e-05	1.25043e-05	3.07938e-05	0.000134223		134.223	8567.83	39.3077
					1340	1.34	1.88015e-05	7.22365e-05	1.2495e-05	3.07632e-05	0.000134296		134.296	8563.16	39.297
					1341	1.341	1.88248e-05	7.23263e-05	1.24857e-05	3.07326e-05	0.000134369		134.369	8558.5	39.2863
					1342	1.342	1.88482e-05	7.24162e-05	1.24763e-05	3.0702e-05	0.000134443		134.443	8553.83	39.2756
					1343	1.343	1.88716e-05	7.2506e-05	1.2467e-05	3.06715e-05	0.000134516		134.516	8549.16	39.2649
					1344	1.344	1.8895e-05	7.25959e-05	1.24577e-05	3.0641e-05	0.00013459		134.59	8544.49	39.2541
					1345	1.345	1.89184e-05	7.26858e-05	1.24485e-05	3.06106e-05	0.000134663		134.663	8539.82	39.2434
					1346	1.346	1.89418e-05	7.27758e-05	1.24392e-05	3.05802e-05	0.000134737		134.737	8535.15	39.2327
					1347	1.347	1.89652e-05	7.28658e-05	1.24299e-05	3.05499e-05	0.000134811		134.811	8530.47	39.2219
					1348	1.348	1.89887e-05	7.29558e-05	1.24207e-05	3.05196e-05	0.000134885		134.885	8525.8	39.2112
					1349	1.349	1.90121e-05	7.30458e-05	1.24114e-05	3.04894e-05	0.000134959		134.959	8521.12	39.2004
					1350	1.35	1.90356e-05	7.31359e-05	1.24022e-05	3.04592e-05	0.000135033		135.033	8516.45	39.1897
					1351	1.351	1.9059e-05	7.3226e-05	1.2393e-05	3.0429e-05	0.000135107		135.107	8511.77	39.1789
					1352	1.352	1.90825e-05	7.33162e-05	1.23838e-05	3.03989e-05	0.000135181		135.181	8507.09	39.1681
					1353	1.353	1.9106e-05	7.34064e-05	1.23746e-05	3.03689e-05	0.000135256		135.256	8502.41	39.1573
					1354	1.354	1.91294e-05	7.34966e-05	1.23654e-05	3.03389e-05	0.00013533		135.33	8497.72	39.1466
					1355	1.355	1.91529e-05	7.35869e-05	1.23563e-05	3.0309e-05	0.000135405		135.405	8493.04	39.1358
					1356	1.356	1.91764e-05	7.36771e-05	1.23471e-05	3.02791e-05	0.00013548		135.48	8488.35	39.125
					1357	1.357	1.91999e-05	7.37675e-05	1.2338e-05	3.02492e-05	0.000135555		135.555	8483.67	39.1142
					1358	1.358	1.92234e-05	7.38578e-05	1.23288e-05	3.02194e-05	0.000135629		135.629	8478.98	39.1034
					1359	1.359	1.9247e-05	7.39482e-05	1.23197e-05	3.01896e-05	0.000135705		135.705	8474.29	39.0926
					1360	1.36	1.92705e-05	7.40386e-05	1.23106e-05	3.01599e-05	0.00013578		135.78	8469.61	39.0817
					1361	1.361	1.9294e-05	7.41291e-05	1.23015e-05	3.01302e-05	0.000135855		135.855	8464.92	39.0709
					1362	1.362	1.93176e-05	7.42195e-05	1.22924e-05	3.01006e-05	0.00013593		135.93	8460.23	39.0601
					1363	1.363	1.93412e-05	7.431e-05	1.22834e-05	3.0071e-05	0.000136006		136.006	8455.53	39.0493
					1364	1.364	1.93647e-05	7.44006e-05	1.22743e-05	3.00415e-05	0.000136081		136.081	8450.84	39.0384
					1365	1.365	1.93883e-05	7.44912e-05	1.22652e-05	3.0012e-05	0.000136157		136.157	8446.15	39.0276
					1366	1.366	1.94119e-05	7.45818e-05	1.22562e-05	2.99826e-05	0.000136232		136.232	8441.45	39.0167
					1367	1.367	1.94355e-05	7.46724e-05	1.22472e-05	2.99532e-05	0.000136308		136.308	8436.76	39.0059
					1368	1.368	1.94591e-05	7.47631e-05	1.22382e-05	2.99239e-05	0.000136384		136.384	8432.06	38.995
					1369	1.369	1.94827e-05	7.48538e-05	1.22292e-05	2.98946e-05	0.00013646		136.46	8427.36	38.9842
					1370	1.37	1.95063e-05	7.49446e-05	1.22202e-05	2.98653e-05	0.000136536		136.536	8422.67	38.9733
					1371	1.371	1.95299e-05	7.50353e-05	1.22112e-05	2.98361e-05	0.000136613		136.613	8417.97	38.9624
					1372	1.372	1.95536e-05	7.51261e-05	1.22022e-05	2.98069e-05	0.000136689		136.689	8413.27	38.9515
					1373	1.373	1.95772e-05	7.5217e-05	1.21933e-05	2.97778e-05	0.000136765		136.765	8408.57	38.9407
					1374	1.374	1.96009e-05	7.53078e-05	1.21843e-05	2.97487e-05	0.000136842		136.842	8403.87	38.9298
					1375	1.375	1.96245e-05	7.53987e-05	1.21754e-05	2.97197e-05	0.000136918		136.918	8399.17	38.9189
					1376	1.376	1.96482e-05	7.54897e-05	1.21664e-05	2.96907e-05	0.000136995		136.995	8394.46	38.908
					1377	1.377	1.96719e-05	7.55806e-05	1.21575e-05	2.96618e-05	0.000137072		137.072	8389.76	38.8971
					1378	1.378	1.96956e-05	7.56716e-05	1.21486e-05	2.96329e-05	0.000137149		137.149	8385.06	38.8862
					1379	1.379	1.97192e-05	7.57627e-05	1.21397e-05	2.9604e-05	0.000137226		137.226	8380.35	38.8753
					1380	1.38	1.97429e-05	7.58537e-05	1.21309e-05	2.95752e-05	0.000137303		137.303	8375.65	38.8644
					1381	1.381	1.97667e-05	7.59448e-05	1.2122e-05	2.95465e-05	0.00013738		137.38	8370.94	38.8534
					1382	1.382	1.97904e-05	7.6036e-05	1.21131e-05	2.95178e-05	0.000137457		137.457	8366.24	38.8425
					1383	1.383	1.98141e-05	7.61271e-05	1.21043e-05	2.94891e-05	0.000137535		137.535	8361.53	38.8316
					1384	1.384	1.98378e-05	7.62183e-05	1.20954e-05	2.94605e-05	0.000137612		137.612	8356.83	38.8207
					1385	1.385	1.98616e-05	7.63095e-05	1.20866e-05	2.94319e-05	0.00013769		137.69	8352.12	38.8097
					1386	1.386	1.98853e-05	7.64008e-05	1.20778e-05	2.94033e-05	0.000137767		137.767	8347.41	38.7988
					1387	1.387	1.99091e-05	7.64921e-05	1.2069e-05	2.93749e-05	0.000137845		137.845	8342.7	38.7878
					1388	1.388	1.99329e-05	7.65834e-05	1.20602e-05	2.93464e-05	0.000137923		137.923	8337.99	38.7769
					1389	1.389	1.99566e-05	7.66748e-05	1.20514e-05	2.9318e-05	0.000138001		138.001	8333.28	38.7659
					1390	1.39	1.99804e-05	7.67661e-05	1.20427e-05	2.92896e-05	0.000138079		138.079	8328.58	38.755
					1391	1.391	2.00042e-05	7.68575e-05	1.20339e-05	2.92613e-05	0.000138157		138.157	8323.87	38.744
					1392	1.392	2.0028e-05	7.6949e-05	1.20251e-05	2.9233e-05	0.000138235		138.235	8319.16	38.7331
					1393	1.393	2.00518e-05	7.70405e-05	1.20164e-05	2.92048e-05	0.000138313		138.313	8314.45	38.7221
					1394	1.394	2.00756e-05	7.7132e-05	1.20077e-05	2.91766e-05	0.000138392		138.392	8309.73	38.7111
					1395	1.395	2.00995e-05	7.72235e-05	1.1999e-05	2.91485e-05	0.00013847		138.47	8305.02	38.7002
					1396	1.396	2.01233e-05	7.73151e-05	1.19903e-05	2.91204e-05	0.000138549		138.549	8300.31	38.6892
					1397	1.397	2.01471e-05	7.74067e-05	1.19816e-05	2.90923e-05	0.000138628		138.628	8295.6	38.6782
					1398	1.398	2.0171e-05	7.74983e-05	1.19729e-05	2.90643e-05	0.000138706		138.706	8290.89	38.6672
					1399	1.399	2.01949e-05	7.759e-05	1.19642e-05	2.90363e-05	0.000138785		138.785	8286.18	38.6562
					1400	1.4	2.02187e-05	7.76817e-05	1.19555e-05	2.90084e-05	0.000138864		138.864	8281.47	38.6452
					1401	1.401	2.02426e-05	7.77734e-05	1.19469e-05	2.89805e-05	0.000138943		138.943	8276.75	38.6342
					1402	1.402	2.02665e-05	7.78652e-05	1.19382e-05	2.89526e-05	0.000139023		139.023	8272.04	38.6232
					1403	1.403	2.02904e-05	7.7957e-05	1.19296e-05	2.89248e-05	0.000139102		139.102	8267.33	38.6122
					1404	1.404	2.03143e-05	7.80488e-05	1.1921e-05	2.88971e-05	0.000139181		139.181	8262.61	38.6012
					1405	1.405	2.03382e-05	7.81407e-05	1.19124e-05	2.88693e-05	0.000139261		139.261	8257.9	38.5902
					1406	1.406	2.03621e-05	7.82325e-05	1.19038e-05	2.88416e-05	0.00013934		139.34	8253.19	38.5792
					1407	1.407	2.0386e-05	7.83245e-05	1.18952e-05	2.8814e-05	0.00013942		139.42	8248.48	38.5682
					1408	1.408	2.04099e-05	7.84164e-05	1.18866e-05	2.87864e-05	0.000139499		139.499	8243.76	38.5572
					1409	1.409	2.04339e-05	7.85084e-05	1.18781e-05	2.87589e-05	0.000139579		139.579	8239.05	38.5461
					1410	1.41	2.04578e-05	7.86004e-05	1.18695e-05	2.87313e-05	0.000139659		139.659	8234.34	38.5351
					1411	1.411	2.04818e-05	7.86924e-05	1.1861e-05	2.87039e-05	0.000139739		139.739	8229.62	38.5241
					1412	1.412	2.05058e-05	7.87845e-05	1.18524e-05	2.86764e-05	0.000139819		139.819	8224.91	38.513
					1413	1.413	2.05297e-05	7.88766e-05	1.18439e-05	2.86491e-05	0.000139899		139.899	8220.2	38.502
					1414	1.414	2.05537e-05	7.89688e-05	1.18354e-05	2.86217e-05	0.00013998		139.98	8215.49	38.491
					1415	1.415	2.05777e-05	7.90609e-05	1.18269e-05	2.85944e-05	0.00014006		140.06	8210.77	38.4799
					1416	1.416	2.06017e-05	7.91531e-05	1.18184e-05	2.85671e-05	0.00014014		140.14	8206.06	38.4689
					1417	1.417	2.06257e-05	7.92453e-05	1.18099e-05	2.85399e-05	0.000140221		140.221	8201.35	38.4578
					1418	1.418	2.06497e-05	7.93376e-05	1.18014e-05	2.85127e-05	0.000140301		140.301	8196.63	38.4468
					1419	1.419	2.06737e-05	7.94299e-05	1.1793e-05	2.84856e-05	0.000140382		140.382	8191.92	38.4357
					1420	1.42	2.06978e-05	7.95222e-05	1.17845e-05	2.84585e-05	0.000140463		140.463	8187.21	38.4247
					1421	1.421	2.07218e-05	7.96146e-05	1.17761e-05	2.84314e-05	0.000140544		140.544	8182.5	38.4136
					1422	1.422	2.07458e-05	7.97069e-05	1.17676e-05	2.84044e-05	0.000140625		140.625	8177.79	38.4026
					1423	1.423	2.07699e-05	7.97994e-05	1.17592e-05	2.83774e-05	0.000140706		140.706	8173.08	38.3915
					1424	1.424	2.0794e-05	7.98918e-05	1.17508e-05	2.83505e-05	0.000140787		140.787	8168.36	38.3804
					1425	1.425	2.0818e-05	7.99843e-05	1.17424e-05	2.83236e-05	0.000140868		140.868	8163.65	38.3694
					1426	1.426	2.08421e-05	8.00768e-05	1.1734e-05	2.82968e-05	0.00014095		140.95	8158.94	38.3583
					1427	1.427	2.08662e-05	8.01693e-05	1.17256e-05	2.82699e-05	0.000141031		141.031	8154.23	38.3472
					1428	1.428	2.08903e-05	8.02619e-05	1.17173e-05	2.82432e-05	0.000141113		141.113	8149.52	38.3361
					1429	1.429	2.09144e-05	8.03545e-05	1.17089e-05	2.82164e-05	0.000141194		141.194	8144.81	38.3251
					1430	1.43	2.09385e-05	8.04471e-05	1.17005e-05	2.81897e-05	0.000141276		141.276	8140.1	38.314
					1431	1.431	2.09626e-05	8.05398e-05	1.16922e-05	2.81631e-05	0.000141358		141.358	8135.39	38.3029
					1432	1.432	2.09867e-05	8.06324e-05	1.16839e-05	2.81365e-05	0.00014144		141.44	8130.68	38.2918
					1433	1.433	2.10109e-05	8.07252e-05	1.16756e-05	2.81099e-05	0.000141521		141.521	8125.98	38.2807
					1434	1.434	2.1035e-05	8.08179e-05	1.16672e-05	2.80833e-05	0.000141604		141.604	8121.27	38.2696
					1435	1.435	2.10592e-05	8.09107e-05	1.16589e-05	2.80568e-05	0.000141686		141.686	8116.56	38.2585
					1436	1.436	2.10833e-05	8.10035e-05	1.16507e-05	2.80304e-05	0.000141768		141.768	8111.85	38.2474
					1437	1.437	2.11075e-05	8.10963e-05	1.16424e-05	2.8004e-05	0.00014185		141.85	8107.15	38.2363
					1438	1.438	2.11316e-05	8.11892e-05	1.16341e-05	2.79776e-05	0.000141933		141.933	8102.44	38.2252
					1439	1.439	2.11558e-05	8.12821e-05	1.16259e-05	2.79512e-05	0.000142015		142.015	8097.73	38.2141
					1440	1.44	2.118e-05	8.1375e-05	1.16176e-05	2.79249e-05	0.000142098		142.098	8093.03	38.203
					1441	1.441	2.12042e-05	8.1468e-05	1.16094e-05	2.78987e-05	0.00014218		142.18	8088.32	38.1919
					1442	1.442	2.12284e-05	8.1561e-05	1.16011e-05	2.78725e-05	0.000142263		142.263	8083.62	38.1808
					1443	1.443	2.12526e-05	8.1654e-05	1.15929e-05	2.78463e-05	0.000142346		142.346	8078.92	38.1697
					1444	1.444	2.12768e-05	8.17471e-05	1.15847e-05	2.78201e-05	0.000142429		142.429	8074.21	38.1586
					1445	1.445	2.13011e-05	8.18401e-05	1.15765e-05	2.7794e-05	0.000142512		142.512	8069.51	38.1475
					1446	1.446	2.13253e-05	8.19332e-05	1.15683e-05	2.7768e-05	0.000142595		142.595	8064.81	38.1364
					1447	1.447	2.13495e-05	8.20264e-05	1.15601e-05	2.77419e-05	0.000142678		142.678	8060.11	38.1253
					1448	1.448	2.13738e-05	8.21196e-05	1.1552e-05	2.77159e-05	0.000142761		142.761	8055.41	38.1141
					1449	1.449	2.1398e-05	8.22128e-05	1.15438e-05	2.769e-05	0.000142845		142.845	8050.71	38.103
					1450	1.45	2.14223e-05	8.2306e-05	1.15356e-05	2.76641e-05	0.000142928		142.928	8046.01	38.0919
					1451	1.451	2.14466e-05	8.23992e-05	1.15275e-05	2.76382e-05	0.000143012		143.012	8041.31	38.0808
					1452	1.452	2.14709e-05	8.24925e-05	1.15194e-05	2.76124e-05	0.000143095		143.095	8036.61	38.0696
					1453	1.453	2.14952e-05	8.25859e-05	1.15113e-05	2.75866e-05	0.000143179		143.179	8031.91	38.0585
					1454	1.454	2.15195e-05	8.26792e-05	1.15031e-05	2.75608e-05	0.000143263		143.263	8027.22	38.0474
					1455	1.455	2.15438e-05	8.27726e-05	1.1495e-05	2.75351e-05	0.000143346		143.346	8022.52	38.0363
					1456	1.456	2.15681e-05	8.2866e-05	1.14869e-05	2.75094e-05	0.00014343		143.43	8017.83	38.0251
					1457	1.457	2.15924e-05	8.29594e-05	1.14789e-05	2.74837e-05	0.000143514		143.514	8013.13	38.014
					1458	1.458	2.16167e-05	8.30529e-05	1.14708e-05	2.74581e-05	0.000143599		143.599	8008.44	38.0029
					1459	1.459	2.16411e-05	8.31464e-05	1.14627e-05	2.74325e-05	0.000143683		143.683	8003.75	37.9917
					1460	1.46	2.16654e-05	8.32399e-05	1.14547e-05	2.7407e-05	0.000143767		143.767	7999.05	37.9806
					1461	1.461	2.16897e-05	8.33335e-05	1.14466e-05	2.73815e-05	0.000143851		143.851	7994.36	37.9694
					1462	1.462	2.17141e-05	8.34271e-05	1.14386e-05	2.73561e-05	0.000143936		143.936	7989.67	37.9583
					1463	1.463	2.17385e-05	8.35207e-05	1.14306e-05	2.73306e-05	0.00014402		144.02	7984.98	37.9472
					1464	1.464	2.17628e-05	8.36143e-05	1.14226e-05	2.73052e-05	0.000144105		144.105	7980.29	37.936
					1465	1.465	2.17872e-05	8.3708e-05	1.14145e-05	2.72799e-05	0.00014419		144.19	7975.61	37.9249
					1466	1.466	2.18116e-05	8.38017e-05	1.14065e-05	2.72546e-05	0.000144274		144.274	7970.92	37.9137
					1467	1.467	2.1836e-05	8.38954e-05	1.13986e-05	2.72293e-05	0.000144359		144.359	7966.23	37.9026
					1468	1.468	2.18604e-05	8.39892e-05	1.13906e-05	2.72041e-05	0.000144444		144.444	7961.55	37.8914
					1469	1.469	2.18848e-05	8.4083e-05	1.13826e-05	2.71789e-05	0.000144529		144.529	7956.86	37.8803
					1470	1.47	2.19092e-05	8.41768e-05	1.13747e-05	2.71537e-05	0.000144614		144.614	7952.18	37.8691
					1471	1.471	2.19337e-05	8.42707e-05	1.13667e-05	2.71286e-05	0.0001447		144.7	7947.5	37.858
					1472	1.472	2.19581e-05	8.43645e-05	1.13588e-05	2.71035e-05	0.000144785		144.785	7942.82	37.8468
					1473	1.473	2.19825e-05	8.44585e-05	1.13508e-05	2.70784e-05	0.00014487		144.87	7938.14	37.8357
					1474	1.474	2.2007e-05	8.45524e-05	1.13429e-05	2.70534e-05	0.000144956		144.956	7933.46	37.8245
					1475	1.475	2.20315e-05	8.46464e-05	1.1335e-05	2.70284e-05	0.000145041		145.041	7928.78	37.8134
					1476	1.476	2.20559e-05	8.47404e-05	1.13271e-05	2.70035e-05	0.000145127		145.127	7924.1	37.8022
					1477	1.477	2.20804e-05	8.48344e-05	1.13192e-05	2.69786e-05	0.000145213		145.213	7919.43	37.7911
					1478	1.478	2.21049e-05	8.49284e-05	1.13113e-05	2.69537e-05	0.000145298		145.298	7914.75	37.7799
					1479	1.479	2.21294e-05	8.50225e-05	1.13034e-05	2.69289e-05	0.000145384		145.384	7910.08	37.7688
					1480	1.48	2.21539e-05	8.51166e-05	1.12956e-05	2.69041e-05	0.00014547		145.47	7905.4	37.7576
					1481	1.481	2.21784e-05	8.52108e-05	1.12877e-05	2.68793e-05	0.000145556		145.556	7900.73	37.7464
					1482	1.482	2.22029e-05	8.53049e-05	1.12799e-05	2.68546e-05	0.000145642		145.642	7896.06	37.7353
					1483	1.483	2.22274e-05	8.53991e-05	1.1272e-05	2.68299e-05	0.000145728		145.728	7891.39	37.7241
					1484	1.484	2.22519e-05	8.54934e-05	1.12642e-05	2.68052e-05	0.000145815		145.815	7886.72	37.713
					1485	1.485	2.22764e-05	8.55876e-05	1.12564e-05	2.67806e-05	0.000145901		145.901	7882.05	37.7018
					1486	1.486	2.2301e-05	8.56819e-05	1.12486e-05	2.6756e-05	0.000145987		145.987	7877.39	37.6906
					1487	1.487	2.23255e-05	8.57762e-05	1.12408e-05	2.67315e-05	0.000146074		146.074	7872.72	37.6795
					1488	1.488	2.23501e-05	8.58706e-05	1.1233e-05	2.67069e-05	0.000146161		146.161	7868.06	37.6683
					1489	1.489	2.23747e-05	8.59649e-05	1.12252e-05	2.66825e-05	0.000146247		146.247	7863.4	37.6571
					1490	1.49	2.23992e-05	8.60593e-05	1.12174e-05	2.6658e-05	0.000146334		146.334	7858.73	37.646
					1491	1.491	2.24238e-05	8.61538e-05	1.12097e-05	2.66336e-05	0.000146421		146.421	7854.07	37.6348
					1492	1.492	2.24484e-05	8.62482e-05	1.12019e-05	2.66092e-05	0.000146508		146.508	7849.42	37.6236
					1493	1.493	2.2473e-05	8.63427e-05	1.11942e-05	2.65849e-05	0.000146595		146.595	7844.76	37.6125
					1494	1.494	2.24976e-05	8.64372e-05	1.11864e-05	2.65606e-05	0.000146682		146.682	7840.1	37.6013
					1495	1.495	2.25222e-05	8.65318e-05	1.11787e-05	2.65363e-05	0.000146769		146.769	7835.45	37.5902
					1496	1.496	2.25468e-05	8.66263e-05	1.1171e-05	2.65121e-05	0.000146856		146.856	7830.79	37.579
					1497	1.497	2.25714e-05	8.67209e-05	1.11633e-05	2.64879e-05	0.000146943		146.943	7826.14	37.5678
					1498	1.498	2.2596e-05	8.68156e-05	1.11556e-05	2.64637e-05	0.000147031		147.031	7821.49	37.5567
					1499	1.499	2.26207e-05	8.69102e-05	1.11479e-05	2.64396e-05	0.000147118		147.118	7816.84	37.5455
					1500	1.5	2.26453e-05	8.70049e-05	1.11402e-05	2.64155e-05	0.000147206		147.206	7812.19	37.5343
					1501	1.501	2.267e-05	8.70996e-05	1.11325e-05	2.63914e-05	0.000147294		147.294	7807.54	37.5232
					1502	1.502	2.26946e-05	8.71944e-05	1.11248e-05	2.63674e-05	0.000147381		147.381	7802.89	37.512
					1503	1.503	2.27193e-05	8.72891e-05	1.11172e-05	2.63434e-05	0.000147469		147.469	7798.25	37.5008
					1504	1.504	2.2744e-05	8.73839e-05	1.11095e-05	2.63194e-05	0.000147557		147.557	7793.6	37.4897
					1505	1.505	2.27687e-05	8.74788e-05	1.11019e-05	2.62955e-05	0.000147645		147.645	7788.96	37.4785
					1506	1.506	2.27934e-05	8.75736e-05	1.10943e-05	2.62716e-05	0.000147733		147.733	7784.32	37.4673
					1507	1.507	2.2818e-05	8.76685e-05	1.10866e-05	2.62478e-05	0.000147821		147.821	7779.68	37.4562
					1508	1.508	2.28427e-05	8.77634e-05	1.1079e-05	2.62239e-05	0.000147909		147.909	7775.04	37.445
					1509	1.509	2.28675e-05	8.78583e-05	1.10714e-05	2.62002e-05	0.000147997		147.997	7770.41	37.4338
					1510	1.51	2.28922e-05	8.79533e-05	1.10638e-05	2.61764e-05	0.000148086		148.086	7765.77	37.4227
					1511	1.511	2.29169e-05	8.80483e-05	1.10562e-05	2.61527e-05	0.000148174		148.174	7761.14	37.4115
					1512	1.512	2.29416e-05	8.81433e-05	1.10487e-05	2.6129e-05	0.000148263		148.263	7756.51	37.4003
					1513	1.513	2.29664e-05	8.82384e-05	1.10411e-05	2.61053e-05	0.000148351		148.351	7751.88	37.3892
					1514	1.514	2.29911e-05	8.83335e-05	1.10335e-05	2.60817e-05	0.00014844		148.44	7747.25	37.378
					1515	1.515	2.30159e-05	8.84286e-05	1.1026e-05	2.60581e-05	0.000148529		148.529	7742.62	37.3668
					1516	1.516	2.30406e-05	8.85237e-05	1.10184e-05	2.60346e-05	0.000148617		148.617	7737.99	37.3557
					1517	1.517	2.30654e-05	8.86189e-05	1.10109e-05	2.60111e-05	0.000148706		148.706	7733.37	37.3445
					1518	1.518	2.30902e-05	8.87141e-05	1.10034e-05	2.59876e-05	0.000148795		148.795	7728.74	37.3333
					1519	1.519	2.3115e-05	8.88093e-05	1.09959e-05	2.59641e-05	0.000148884		148.884	7724.12	37.3222
					1520	1.52	2.31398e-05	8.89045e-05	1.09884e-05	2.59407e-05	0.000148973		148.973	7719.5	37.311
					1521	1.521	2.31646e-05	8.89998e-05	1.09809e-05	2.59173e-05	0.000149063		149.063	7714.88	37.2998
					1522	1.522	2.31894e-05	8.90951e-05	1.09734e-05	2.5894e-05	0.000149152		149.152	7710.27	37.2887
					1523	1.523	2.32142e-05	8.91904e-05	1.09659e-05	2.58706e-05	0.000149241		149.241	7705.65	37.2775
					1524	1.524	2.3239e-05	8.92858e-05	1.09584e-05	2.58473e-05	0.000149331		149.331	7701.04	37.2664
					1525	1.525	2.32638e-05	8.93812e-05	1.09509e-05	2.58241e-05	0.00014942		149.42	7696.43	37.2552
					1526	1.526	2.32886e-05	8.94766e-05	1.09435e-05	2.58009e-05	0.00014951		149.51	7691.81	37.244
					1527	1.527	2.33135e-05	8.9572e-05	1.0936e-05	2.57777e-05	0.000149599		149.599	7687.21	37.2329
					1528	1.528	2.33383e-05	8.96675e-05	1.09286e-05	2.57545e-05	0.000149689		149.689	7682.6	37.2217
					1529	1.529	2.33632e-05	8.9763e-05	1.09212e-05	2.57314e-05	0.000149779		149.779	7677.99	37.2106
					1530	1.53	2.33881e-05	8.98585e-05	1.09137e-05	2.57083e-05	0.000149869		149.869	7673.39	37.1994
					1531	1.531	2.34129e-05	8.99541e-05	1.09063e-05	2.56852e-05	0.000149959		149.959	7668.79	37.1882
					1532	1.532	2.34378e-05	9.00496e-05	1.08989e-05	2.56622e-05	0.000150049		150.049	7664.18	37.1771
					1533	1.533	2.34627e-05	9.01452e-05	1.08915e-05	2.56392e-05	0.000150139		150.139	7659.59	37.1659
					1534	1.534	2.34876e-05	9.02409e-05	1.08841e-05	2.56163e-05	0.000150229		150.229	7654.99	37.1548
					1535	1.535	2.35125e-05	9.03365e-05	1.08768e-05	2.55933e-05	0.000150319		150.319	7650.39	37.1436
					1536	1.536	2.35374e-05	9.04322e-05	1.08694e-05	2.55704e-05	0.000150409		150.409	7645.8	37.1325
					1537	1.537	2.35623e-05	9.05279e-05	1.0862e-05	2.55476e-05	0.0001505		150.5	7641.21	37.1213
					1538	1.538	2.35872e-05	9.06237e-05	1.08547e-05	2.55247e-05	0.00015059		150.59	7636.61	37.1102
					1539	1.539	2.36121e-05	9.07194e-05	1.08473e-05	2.55019e-05	0.000150681		150.681	7632.03	37.099
					1540	1.54	2.36371e-05	9.08152e-05	1.084e-05	2.54792e-05	0.000150771		150.771	7627.44	37.0878
					1541	1.541	2.3662e-05	9.09111e-05	1.08327e-05	2.54564e-05	0.000150862		150.862	7622.85	37.0767
					1542	1.542	2.3687e-05	9.10069e-05	1.08253e-05	2.54337e-05	0.000150953		150.953	7618.27	37.0655
					1543	1.543	2.37119e-05	9.11028e-05	1.0818e-05	2.5411e-05	0.000151044		151.044	7613.69	37.0544
					1544	1.544	2.37369e-05	9.11987e-05	1.08107e-05	2.53884e-05	0.000151135		151.135	7609.11	37.0433
					1545	1.545	2.37618e-05	9.12946e-05	1.08034e-05	2.53658e-05	0.000151226		151.226	7604.53	37.0321
					1546	1.546	2.37868e-05	9.13906e-05	1.07961e-05	2.53432e-05	0.000151317		151.317	7599.95	37.021
					1547	1.547	2.38118e-05	9.14866e-05	1.07888e-05	2.53207e-05	0.000151408		151.408	7595.38	37.0098
					1548	1.548	2.38368e-05	9.15826e-05	1.07816e-05	2.52981e-05	0.000151499		151.499	7590.8	36.9987
					1549	1.549	2.38618e-05	9.16786e-05	1.07743e-05	2.52757e-05	0.00015159		151.59	7586.23	36.9875
					1550	1.55	2.38868e-05	9.17747e-05	1.07671e-05	2.52532e-05	0.000151682		151.682	7581.66	36.9764
					1551	1.551	2.39118e-05	9.18708e-05	1.07598e-05	2.52308e-05	0.000151773		151.773	7577.1	36.9653
					1552	1.552	2.39368e-05	9.19669e-05	1.07526e-05	2.52084e-05	0.000151865		151.865	7572.53	36.9541
					1553	1.553	2.39618e-05	9.20631e-05	1.07453e-05	2.5186e-05	0.000151956		151.956	7567.97	36.943
					1554	1.554	2.39869e-05	9.21592e-05	1.07381e-05	2.51637e-05	0.000152048		152.048	7563.41	36.9318
					1555	1.555	2.40119e-05	9.22554e-05	1.07309e-05	2.51414e-05	0.00015214		152.14	7558.85	36.9207
					1556	1.556	2.4037e-05	9.23517e-05	1.07237e-05	2.51191e-05	0.000152231		152.231	7554.29	36.9096
					1557	1.557	2.4062e-05	9.24479e-05	1.07165e-05	2.50969e-05	0.000152323		152.323	7549.73	36.8984
					1558	1.558	2.40871e-05	9.25442e-05	1.07093e-05	2.50747e-05	0.000152415		152.415	7545.18	36.8873
					1559	1.559	2.41121e-05	9.26405e-05	1.07021e-05	2.50525e-05	0.000152507		152.507	7540.62	36.8762
					1560	1.56	2.41372e-05	9.27368e-05	1.06949e-05	2.50304e-05	0.000152599		152.599	7536.07	36.8651
					1561	1.561	2.41623e-05	9.28332e-05	1.06878e-05	2.50082e-05	0.000152692		152.692	7531.53	36.8539
					1562	1.562	2.41874e-05	9.29296e-05	1.06806e-05	2.49862e-05	0.000152784		152.784	7526.98	36.8428
					1563	1.563	2.42125e-05	9.3026e-05	1.06735e-05	2.49641e-05	0.000152876		152.876	7522.43	36.8317
					1564	1.564	2.42376e-05	9.31224e-05	1.06663e-05	2.49421e-05	0.000152968		152.968	7517.89	36.8206
					1565	1.565	2.42627e-05	9.32189e-05	1.06592e-05	2.49201e-05	0.000153061		153.061	7513.35	36.8094
					1566	1.566	2.42878e-05	9.33154e-05	1.06521e-05	2.48981e-05	0.000153153		153.153	7508.81	36.7983
					1567	1.567	2.43129e-05	9.34119e-05	1.06449e-05	2.48762e-05	0.000153246		153.246	7504.27	36.7872
					1568	1.568	2.43381e-05	9.35085e-05	1.06378e-05	2.48543e-05	0.000153339		153.339	7499.74	36.7761
					1569	1.569	2.43632e-05	9.3605e-05	1.06307e-05	2.48324e-05	0.000153431		153.431	7495.21	36.765
					1570	1.57	2.43883e-05	9.37016e-05	1.06236e-05	2.48106e-05	0.000153524		153.524	7490.68	36.7538
					1571	1.571	2.44135e-05	9.37983e-05	1.06166e-05	2.47888e-05	0.000153617		153.617	7486.15	36.7427
					1572	1.572	2.44386e-05	9.38949e-05	1.06095e-05	2.4767e-05	0.00015371		153.71	7481.62	36.7316
					1573	1.573	2.44638e-05	9.39916e-05	1.06024e-05	2.47452e-05	0.000153803		153.803	7477.1	36.7205
					1574	1.574	2.4489e-05	9.40883e-05	1.05953e-05	2.47235e-05	0.000153896		153.896	7472.57	36.7094
					1575	1.575	2.45141e-05	9.4185e-05	1.05883e-05	2.47018e-05	0.000153989		153.989	7468.05	36.6983
					1576	1.576	2.45393e-05	9.42818e-05	1.05812e-05	2.46801e-05	0.000154083		154.083	7463.53	36.6872
					1577	1.577	2.45645e-05	9.43786e-05	1.05742e-05	2.46585e-05	0.000154176		154.176	7459.02	36.6761
					1578	1.578	2.45897e-05	9.44754e-05	1.05672e-05	2.46369e-05	0.000154269		154.269	7454.5	36.665
					1579	1.579	2.46149e-05	9.45722e-05	1.05601e-05	2.46153e-05	0.000154363		154.363	7449.99	36.6539
					1580	1.58	2.46401e-05	9.46691e-05	1.05531e-05	2.45938e-05	0.000154456		154.456	7445.48	36.6428
					1581	1.581	2.46654e-05	9.4766e-05	1.05461e-05	2.45723e-05	0.00015455		154.55	7440.97	36.6317
					1582	1.582	2.46906e-05	9.48629e-05	1.05391e-05	2.45508e-05	0.000154643		154.643	7436.47	36.6206
					1583	1.583	2.47158e-05	9.49598e-05	1.05321e-05	2.45293e-05	0.000154737		154.737	7431.96	36.6095
					1584	1.584	2.4741e-05	9.50568e-05	1.05251e-05	2.45079e-05	0.000154831		154.831	7427.46	36.5984
					1585	1.585	2.47663e-05	9.51538e-05	1.05182e-05	2.44865e-05	0.000154925		154.925	7422.96	36.5873
					1586	1.586	2.47915e-05	9.52508e-05	1.05112e-05	2.44651e-05	0.000155019		155.019	7418.46	36.5763
					1587	1.587	2.48168e-05	9.53478e-05	1.05042e-05	2.44438e-05	0.000155113		155.113	7413.97	36.5652
					1588	1.588	2.48421e-05	9.54449e-05	1.04973e-05	2.44225e-05	0.000155207		155.207	7409.47	36.5541
					1589	1.589	2.48673e-05	9.5542e-05	1.04903e-05	2.44012e-05	0.000155301		155.301	7404.98	36.543
					1590	1.59	2.48926e-05	9.56391e-05	1.04834e-05	2.438e-05	0.000155395		155.395	7400.49	36.5319
					1591	1.591	2.49179e-05	9.57363e-05	1.04765e-05	2.43587e-05	0.000155489		155.489	7396	36.5208
					1592	1.592	2.49432e-05	9.58334e-05	1.04695e-05	2.43375e-05	0.000155584		155.584	7391.52	36.5098
					1593	1.593	2.49685e-05	9.59306e-05	1.04626e-05	2.43164e-05	0.000155678		155.678	7387.04	36.4987
					1594	1.594	2.49938e-05	9.60279e-05	1.04557e-05	2.42952e-05	0.000155773		155.773	7382.56	36.4876
					1595	1.595	2.50191e-05	9.61251e-05	1.04488e-05	2.42741e-05	0.000155867		155.867	7378.08	36.4766
					1596	1.596	2.50444e-05	9.62224e-05	1.04419e-05	2.4253e-05	0.000155962		155.962	7373.6	36.4655
					1597	1.597	2.50698e-05	9.63197e-05	1.0435e-05	2.4232e-05	0.000156056		156.056	7369.13	36.4544
					1598	1.598	2.50951e-05	9.6417e-05	1.04282e-05	2.4211e-05	0.000156151		156.151	7364.66	36.4434
					1599	1.599	2.51204e-05	9.65144e-05	1.04213e-05	2.419e-05	0.000156246		156.246	7360.19	36.4323
					1600	1.6	2.51458e-05	9.66118e-05	1.04144e-05	2.4169e-05	0.000156341		156.341	7355.72	36.4212
					1601	1.601	2.51711e-05	9.67092e-05	1.04076e-05	2.41481e-05	0.000156436		156.436	7351.25	36.4102
					1602	1.602	2.51965e-05	9.68066e-05	1.04007e-05	2.41271e-05	0.000156531		156.531	7346.79	36.3991
					1603	1.603	2.52218e-05	9.6904e-05	1.03939e-05	2.41063e-05	0.000156626		156.626	7342.33	36.3881
					1604	1.604	2.52472e-05	9.70015e-05	1.0387e-05	2.40854e-05	0.000156721		156.721	7337.87	36.377
					1605	1.605	2.52726e-05	9.7099e-05	1.03802e-05	2.40646e-05	0.000156816		156.816	7333.42	36.366
					1606	1.606	2.5298e-05	9.71966e-05	1.03734e-05	2.40438e-05	0.000156912		156.912	7328.96	36.3549
					1607	1.607	2.53234e-05	9.72941e-05	1.03666e-05	2.4023e-05	0.000157007		157.007	7324.51	36.3439
					1608	1.608	2.53488e-05	9.73917e-05	1.03598e-05	2.40023e-05	0.000157103		157.103	7320.06	36.3329
					1609	1.609	2.53742e-05	9.74893e-05	1.0353e-05	2.39816e-05	0.000157198		157.198	7315.61	36.3218
					1610	1.61	2.53996e-05	9.75869e-05	1.03462e-05	2.39609e-05	0.000157294		157.294	7311.17	36.3108
					1611	1.611	2.5425e-05	9.76846e-05	1.03394e-05	2.39402e-05	0.000157389		157.389	7306.73	36.2998
					1612	1.612	2.54504e-05	9.77823e-05	1.03327e-05	2.39196e-05	0.000157485		157.485	7302.29	36.2887
					1613	1.613	2.54759e-05	9.788e-05	1.03259e-05	2.3899e-05	0.000157581		157.581	7297.85	36.2777
					1614	1.614	2.55013e-05	9.79777e-05	1.03191e-05	2.38784e-05	0.000157677		157.677	7293.41	36.2667
					1615	1.615	2.55267e-05	9.80755e-05	1.03124e-05	2.38579e-05	0.000157772		157.772	7288.98	36.2556
					1616	1.616	2.55522e-05	9.81733e-05	1.03056e-05	2.38373e-05	0.000157868		157.868	7284.55	36.2446
					1617	1.617	2.55776e-05	9.82711e-05	1.02989e-05	2.38168e-05	0.000157964		157.964	7280.12	36.2336
					1618	1.618	2.56031e-05	9.83689e-05	1.02922e-05	2.37964e-05	0.000158061		158.061	7275.69	36.2226
					1619	1.619	2.56286e-05	9.84668e-05	1.02854e-05	2.37759e-05	0.000158157		158.157	7271.27	36.2116
					1620	1.62	2.56541e-05	9.85646e-05	1.02787e-05	2.37555e-05	0.000158253		158.253	7266.85	36.2006
					1621	1.621	2.56795e-05	9.86626e-05	1.0272e-05	2.37351e-05	0.000158349		158.349	7262.43	36.1895
					1622	1.622	2.5705e-05	9.87605e-05	1.02653e-05	2.37148e-05	0.000158446		158.446	7258.01	36.1785
					1623	1.623	2.57305e-05	9.88584e-05	1.02586e-05	2.36945e-05	0.000158542		158.542	7253.6	36.1675
					1624	1.624	2.5756e-05	9.89564e-05	1.0252e-05	2.36742e-05	0.000158639		158.639	7249.18	36.1565
					1625	1.625	2.57815e-05	9.90544e-05	1.02453e-05	2.36539e-05	0.000158735		158.735	7244.77	36.1455
					1626	1.626	2.58071e-05	9.91525e-05	1.02386e-05	2.36336e-05	0.000158832		158.832	7240.37	36.1345
					1627	1.627	2.58326e-05	9.92505e-05	1.02319e-05	2.36134e-05	0.000158928		158.928	7235.96	36.1235
					1628	1.628	2.58581e-05	9.93486e-05	1.02253e-05	2.35932e-05	0.000159025		159.025	7231.56	36.1126
					1629	1.629	2.58836e-05	9.94467e-05	1.02186e-05	2.35731e-05	0.000159122		159.122	7227.16	36.1016
					1630	1.63	2.59092e-05	9.95448e-05	1.0212e-05	2.35529e-05	0.000159219		159.219	7222.76	36.0906
					1631	1.631	2.59347e-05	9.9643e-05	1.02054e-05	2.35328e-05	0.000159316		159.316	7218.36	36.0796
					1632	1.632	2.59603e-05	9.97412e-05	1.01987e-05	2.35127e-05	0.000159413		159.413	7213.97	36.0686
					1633	1.633	2.59858e-05	9.98394e-05	1.01921e-05	2.34926e-05	0.00015951		159.51	7209.58	36.0576
					1634	1.634	2.60114e-05	9.99376e-05	1.01855e-05	2.34726e-05	0.000159607		159.607	7205.19	36.0467
					1635	1.635	2.6037e-05	0.000100036	1.01789e-05	2.34526e-05	0.000159704		159.704	7200.81	36.0357
					1636	1.636	2.60626e-05	0.000100134	1.01723e-05	2.34326e-05	0.000159802		159.802	7196.42	36.0247
					1637	1.637	2.60882e-05	0.000100232	1.01657e-05	2.34127e-05	0.000159899		159.899	7192.04	36.0137
					1638	1.638	2.61137e-05	0.000100331	1.01591e-05	2.33927e-05	0.000159996		159.996	7187.66	36.0028
					1639	1.639	2.61393e-05	0.000100429	1.01525e-05	2.33728e-05	0.000160094		160.094	7183.29	35.9918
					1640	1.64	2.6165e-05	0.000100528	1.0146e-05	2.3353e-05	0.000160191		160.191	7178.91	35.9809
					1641	1.641	2.61906e-05	0.000100626	1.01394e-05	2.33331e-05	0.000160289		160.289	7174.54	35.9699
					1642	1.642	2.62162e-05	0.000100724	1.01328e-05	2.33133e-05	0.000160387		160.387	7170.17	35.959
					1643	1.643	2.62418e-05	0.000100823	1.01263e-05	2.32935e-05	0.000160484		160.484	7165.81	35.948
					1644	1.644	2.62674e-05	0.000100921	1.01198e-05	2.32737e-05	0.000160582		160.582	7161.44	35.9371
					1645	1.645	2.62931e-05	0.00010102	1.01132e-05	2.3254e-05	0.00016068		160.68	7157.08	35.9261
					1646	1.646	2.63187e-05	0.000101118	1.01067e-05	2.32343e-05	0.000160778		160.778	7152.72	35.9152
					1647	1.647	2.63444e-05	0.000101217	1.01002e-05	2.32146e-05	0.000160876		160.876	7148.36	35.9042
					1648	1.648	2.637e-05	0.000101315	1.00937e-05	2.31949e-05	0.000160974		160.974	7144.01	35.8933
					1649	1.649	2.63957e-05	0.000101414	1.00871e-05	2.31753e-05	0.000161072		161.072	7139.66	35.8824
					1650	1.65	2.64214e-05	0.000101513	1.00806e-05	2.31556e-05	0.00016117		161.17	7135.31	35.8714
					1651	1.651	2.6447e-05	0.000101611	1.00741e-05	2.31361e-05	0.000161269		161.269	7130.96	35.8605
					1652	1.652	2.64727e-05	0.00010171	1.00677e-05	2.31165e-05	0.000161367		161.367	7126.62	35.8496
					1653	1.653	2.64984e-05	0.000101809	1.00612e-05	2.3097e-05	0.000161465		161.465	7122.28	35.8387
					1654	1.654	2.65241e-05	0.000101907	1.00547e-05	2.30774e-05	0.000161564		161.564	7117.94	35.8277
					1655	1.655	2.65498e-05	0.000102006	1.00482e-05	2.3058e-05	0.000161662		161.662	7113.6	35.8168
					1656	1.656	2.65755e-05	0.000102105	1.00418e-05	2.30385e-05	0.000161761		161.761	7109.27	35.8059
					1657	1.657	2.66012e-05	0.000102204	1.00353e-05	2.30191e-05	0.000161859		161.859	7104.94	35.795
					1658	1.658	2.66269e-05	0.000102302	1.00289e-05	2.29997e-05	0.000161958		161.958	7100.61	35.7841
					1659	1.659	2.66527e-05	0.000102401	1.00224e-05	2.29803e-05	0.000162057		162.057	7096.28	35.7732
					1660	1.66	2.66784e-05	0.0001025	1.0016e-05	2.29609e-05	0.000162156		162.156	7091.96	35.7623
					1661	1.661	2.67041e-05	0.000102599	1.00096e-05	2.29416e-05	0.000162254		162.254	7087.64	35.7514
					1662	1.662	2.67299e-05	0.000102698	1.00032e-05	2.29223e-05	0.000162353		162.353	7083.32	35.7405
					1663	1.663	2.67556e-05	0.000102797	9.99676e-06	2.2903e-05	0.000162452		162.452	7079	35.7296
					1664	1.664	2.67814e-05	0.000102896	9.99036e-06	2.28837e-05	0.000162551		162.551	7074.69	35.7187
					1665	1.665	2.68071e-05	0.000102995	9.98396e-06	2.28645e-05	0.00016265		162.65	7070.38	35.7078
					1666	1.666	2.68329e-05	0.000103094	9.97757e-06	2.28453e-05	0.00016275		162.75	7066.07	35.697
					1667	1.667	2.68587e-05	0.000103193	9.97119e-06	2.28261e-05	0.000162849		162.849	7061.76	35.6861
					1668	1.668	2.68845e-05	0.000103292	9.96481e-06	2.28069e-05	0.000162948		162.948	7057.46	35.6752
					1669	1.669	2.69103e-05	0.000103391	9.95844e-06	2.27878e-05	0.000163048		163.048	7053.16	35.6643
					1670	1.67	2.6936e-05	0.00010349	9.95207e-06	2.27687e-05	0.000163147		163.147	7048.86	35.6535
					1671	1.671	2.69618e-05	0.000103589	9.94572e-06	2.27496e-05	0.000163246		163.246	7044.56	35.6426
					1672	1.672	2.69877e-05	0.000103688	9.93937e-06	2.27306e-05	0.000163346		163.346	7040.27	35.6317
					1673	1.673	2.70135e-05	0.000103788	9.93302e-06	2.27115e-05	0.000163446		163.446	7035.98	35.6209
					1674	1.674	2.70393e-05	0.000103887	9.92669e-06	2.26925e-05	0.000163545		163.545	7031.69	35.61
					1675	1.675	2.70651e-05	0.000103986	9.92036e-06	2.26735e-05	0.000163645		163.645	7027.41	35.5992
					1676	1.676	2.70909e-05	0.000104085	9.91403e-06	2.26546e-05	0.000163745		163.745	7023.13	35.5883
					1677	1.677	2.71168e-05	0.000104184	9.90771e-06	2.26356e-05	0.000163845		163.845	7018.85	35.5775
					1678	1.678	2.71426e-05	0.000104284	9.9014e-06	2.26167e-05	0.000163945		163.945	7014.57	35.5666
					1679	1.679	2.71685e-05	0.000104383	9.8951e-06	2.25978e-05	0.000164044		164.044	7010.29	35.5558
					1680	1.68	2.71943e-05	0.000104482	9.8888e-06	2.2579e-05	0.000164145		164.145	7006.02	35.545
					1681	1.681	2.72202e-05	0.000104582	9.88251e-06	2.25601e-05	0.000164245		164.245	7001.75	35.5341
					1682	1.682	2.7246e-05	0.000104681	9.87623e-06	2.25413e-05	0.000164345		164.345	6997.48	35.5233
					1683	1.683	2.72719e-05	0.000104781	9.86995e-06	2.25225e-05	0.000164445		164.445	6993.22	35.5125
					1684	1.684	2.72978e-05	0.00010488	9.86368e-06	2.25038e-05	0.000164545		164.545	6988.96	35.5016
					1685	1.685	2.73237e-05	0.000104979	9.85742e-06	2.2485e-05	0.000164646		164.646	6984.7	35.4908
					1686	1.686	2.73496e-05	0.000105079	9.85116e-06	2.24663e-05	0.000164746		164.746	6980.44	35.48
					1687	1.687	2.73755e-05	0.000105178	9.84491e-06	2.24476e-05	0.000164846		164.846	6976.19	35.4692
					1688	1.688	2.74014e-05	0.000105278	9.83867e-06	2.24289e-05	0.000164947		164.947	6971.94	35.4584
					1689	1.689	2.74273e-05	0.000105378	9.83243e-06	2.24103e-05	0.000165048		165.048	6967.69	35.4476
					1690	1.69	2.74532e-05	0.000105477	9.8262e-06	2.23917e-05	0.000165148		165.148	6963.44	35.4368
					1691	1.691	2.74791e-05	0.000105577	9.81997e-06	2.23731e-05	0.000165249		165.249	6959.2	35.426
					1692	1.692	2.75051e-05	0.000105676	9.81375e-06	2.23545e-05	0.00016535		165.35	6954.96	35.4152
					1693	1.693	2.7531e-05	0.000105776	9.80754e-06	2.2336e-05	0.00016545		165.45	6950.72	35.4044
					1694	1.694	2.75569e-05	0.000105876	9.80134e-06	2.23174e-05	0.000165551		165.551	6946.49	35.3936
					1695	1.695	2.75829e-05	0.000105975	9.79514e-06	2.22989e-05	0.000165652		165.652	6942.26	35.3828
					1696	1.696	2.76088e-05	0.000106075	9.78895e-06	2.22805e-05	0.000165753		165.753	6938.03	35.372
					1697	1.697	2.76348e-05	0.000106175	9.78276e-06	2.2262e-05	0.000165854		165.854	6933.8	35.3613
					1698	1.698	2.76607e-05	0.000106274	9.77658e-06	2.22436e-05	0.000165955		165.955	6929.57	35.3505
					1699	1.699	2.76867e-05	0.000106374	9.77041e-06	2.22252e-05	0.000166057		166.057	6925.35	35.3397
					1700	1.7	2.77127e-05	0.000106474	9.76424e-06	2.22068e-05	0.000166158		166.158	6921.13	35.329
					1701	1.701	2.77387e-05	0.000106574	9.75808e-06	2.21884e-05	0.000166259		166.259	6916.92	35.3182
					1702	1.702	2.77647e-05	0.000106674	9.75193e-06	2.21701e-05	0.00016636		166.36	6912.7	35.3074
					1703	1.703	2.77907e-05	0.000106774	9.74578e-06	2.21518e-05	0.000166462		166.462	6908.49	35.2967
					1704	1.704	2.78167e-05	0.000106873	9.73964e-06	2.21335e-05	0.000166563		166.563	6904.28	35.2859
					1705	1.705	2.78427e-05	0.000106973	9.73351e-06	2.21152e-05	0.000166665		166.665	6900.08	35.2752
					1706	1.706	2.78687e-05	0.000107073	9.72738e-06	2.2097e-05	0.000166766		166.766	6895.88	35.2644
					1707	1.707	2.78947e-05	0.000107173	9.72126e-06	2.20788e-05	0.000166868		166.868	6891.68	35.2537
					1708	1.708	2.79207e-05	0.000107273	9.71514e-06	2.20606e-05	0.00016697		166.97	6887.48	35.243
					1709	1.709	2.79467e-05	0.000107373	9.70903e-06	2.20424e-05	0.000167071		167.071	6883.28	35.2322
					1710	1.71	2.79728e-05	0.000107473	9.70293e-06	2.20242e-05	0.000167173		167.173	6879.09	35.2215
					1711	1.711	2.79988e-05	0.000107573	9.69683e-06	2.20061e-05	0.000167275		167.275	6874.9	35.2108
					1712	1.712	2.80249e-05	0.000107673	9.69074e-06	2.1988e-05	0.000167377		167.377	6870.72	35.2
					1713	1.713	2.80509e-05	0.000107774	9.68466e-06	2.19699e-05	0.000167479		167.479	6866.53	35.1893
					1714	1.714	2.8077e-05	0.000107874	9.67858e-06	2.19519e-05	0.000167581		167.581	6862.35	35.1786
					1715	1.715	2.8103e-05	0.000107974	9.67251e-06	2.19338e-05	0.000167683		167.683	6858.17	35.1679
					1716	1.716	2.81291e-05	0.000108074	9.66645e-06	2.19158e-05	0.000167785		167.785	6854	35.1572
					1717	1.717	2.81552e-05	0.000108174	9.66039e-06	2.18978e-05	0.000167888		167.888	6849.82	35.1465
					1718	1.718	2.81813e-05	0.000108274	9.65434e-06	2.18799e-05	0.00016799		167.99	6845.65	35.1358
					1719	1.719	2.82074e-05	0.000108375	9.64829e-06	2.18619e-05	0.000168092		168.092	6841.49	35.1251
					1720	1.72	2.82334e-05	0.000108475	9.64225e-06	2.1844e-05	0.000168195		168.195	6837.32	35.1144
					1721	1.721	2.82595e-05	0.000108575	9.63622e-06	2.18261e-05	0.000168297		168.297	6833.16	35.1037
					1722	1.722	2.82857e-05	0.000108675	9.63019e-06	2.18082e-05	0.000168399		168.399	6829	35.093
					1723	1.723	2.83118e-05	0.000108776	9.62417e-06	2.17904e-05	0.000168502		168.502	6824.84	35.0823
					1724	1.724	2.83379e-05	0.000108876	9.61815e-06	2.17725e-05	0.000168605		168.605	6820.69	35.0717
					1725	1.725	2.8364e-05	0.000108976	9.61214e-06	2.17547e-05	0.000168707		168.707	6816.54	35.061
					1726	1.726	2.83901e-05	0.000109077	9.60614e-06	2.1737e-05	0.00016881		168.81	6812.39	35.0503
					1727	1.727	2.84163e-05	0.000109177	9.60014e-06	2.17192e-05	0.000168913		168.913	6808.24	35.0397
					1728	1.728	2.84424e-05	0.000109278	9.59415e-06	2.17015e-05	0.000169016		169.016	6804.1	35.029
					1729	1.729	2.84686e-05	0.000109378	9.58817e-06	2.16837e-05	0.000169119		169.119	6799.96	35.0183
					1730	1.73	2.84947e-05	0.000109479	9.58219e-06	2.1666e-05	0.000169222		169.222	6795.83	35.0077
					1731	1.731	2.85209e-05	0.000109579	9.57622e-06	2.16484e-05	0.000169325		169.325	6791.69	34.997
					1732	1.732	2.8547e-05	0.00010968	9.57025e-06	2.16307e-05	0.000169428		169.428	6787.56	34.9864
					1733	1.733	2.85732e-05	0.00010978	9.56429e-06	2.16131e-05	0.000169531		169.531	6783.43	34.9757
					1734	1.734	2.85994e-05	0.000109881	9.55834e-06	2.15955e-05	0.000169634		169.634	6779.3	34.9651
					1735	1.735	2.86256e-05	0.000109981	9.55239e-06	2.15779e-05	0.000169737		169.737	6775.18	34.9545
					1736	1.736	2.86517e-05	0.000110082	9.54645e-06	2.15603e-05	0.00016984		169.84	6771.06	34.9438
					1737	1.737	2.86779e-05	0.000110183	9.54052e-06	2.15428e-05	0.000169944		169.944	6766.94	34.9332
					1738	1.738	2.87041e-05	0.000110283	9.53459e-06	2.15253e-05	0.000170047		170.047	6762.83	34.9226
					1739	1.739	2.87303e-05	0.000110384	9.52866e-06	2.15078e-05	0.000170151		170.151	6758.72	34.912
					1740	1.74	2.87565e-05	0.000110485	9.52275e-06	2.14903e-05	0.000170254		170.254	6754.61	34.9014
					1741	1.741	2.87828e-05	0.000110585	9.51684e-06	2.14729e-05	0.000170358		170.358	6750.5	34.8907
					1742	1.742	2.8809e-05	0.000110686	9.51093e-06	2.14554e-05	0.000170461		170.461	6746.4	34.8801
					1743	1.743	2.88352e-05	0.000110787	9.50503e-06	2.1438e-05	0.000170565		170.565	6742.3	34.8695
					1744	1.744	2.88614e-05	0.000110888	9.49914e-06	2.14206e-05	0.000170669		170.669	6738.2	34.8589
					1745	1.745	2.88877e-05	0.000110988	9.49325e-06	2.14033e-05	0.000170773		170.773	6734.1	34.8483
					1746	1.746	2.89139e-05	0.000111089	9.48737e-06	2.13859e-05	0.000170876		170.876	6730.01	34.8378
					1747	1.747	2.89402e-05	0.00011119	9.4815e-06	2.13686e-05	0.00017098		170.98	6725.92	34.8272
					1748	1.748	2.89664e-05	0.000111291	9.47563e-06	2.13513e-05	0.000171084		171.084	6721.83	34.8166
					1749	1.749	2.89927e-05	0.000111392	9.46976e-06	2.1334e-05	0.000171188		171.188	6717.75	34.806
					1750	1.75	2.90189e-05	0.000111493	9.46391e-06	2.13168e-05	0.000171292		171.292	6713.67	34.7954
					1751	1.751	2.90452e-05	0.000111594	9.45806e-06	2.12995e-05	0.000171397		171.397	6709.59	34.7849
					1752	1.752	2.90715e-05	0.000111695	9.45221e-06	2.12823e-05	0.000171501		171.501	6705.51	34.7743
					1753	1.753	2.90978e-05	0.000111796	9.44637e-06	2.12651e-05	0.000171605		171.605	6701.44	34.7637
					1754	1.754	2.91241e-05	0.000111897	9.44054e-06	2.12479e-05	0.000171709		171.709	6697.37	34.7532
					1755	1.755	2.91504e-05	0.000111998	9.43471e-06	2.12308e-05	0.000171814		171.814	6693.3	34.7426
					1756	1.756	2.91767e-05	0.000112099	9.42889e-06	2.12137e-05	0.000171918		171.918	6689.24	34.7321
					1757	1.757	2.9203e-05	0.0001122	9.42307e-06	2.11966e-05	0.000172022		172.022	6685.18	34.7215
					1758	1.758	2.92293e-05	0.000112301	9.41726e-06	2.11795e-05	0.000172127		172.127	6681.12	34.711
					1759	1.759	2.92556e-05	0.000112402	9.41146e-06	2.11624e-05	0.000172231		172.231	6677.06	34.7004
					1760	1.76	2.92819e-05	0.000112503	9.40566e-06	2.11454e-05	0.000172336		172.336	6673.01	34.6899
					1761	1.761	2.93082e-05	0.000112604	9.39987e-06	2.11283e-05	0.000172441		172.441	6668.96	34.6794
					1762	1.762	2.93346e-05	0.000112705	9.39408e-06	2.11113e-05	0.000172545		172.545	6664.91	34.6689
					1763	1.763	2.93609e-05	0.000112807	9.3883e-06	2.10944e-05	0.00017265		172.65	6660.87	34.6583
					1764	1.764	2.93873e-05	0.000112908	9.38253e-06	2.10774e-05	0.000172755		172.755	6656.82	34.6478
					1765	1.765	2.94136e-05	0.000113009	9.37676e-06	2.10605e-05	0.00017286		172.86	6652.79	34.6373
					1766	1.766	2.944e-05	0.00011311	9.371e-06	2.10435e-05	0.000172965		172.965	6648.75	34.6268
					1767	1.767	2.94663e-05	0.000113212	9.36524e-06	2.10266e-05	0.00017307		173.07	6644.72	34.6163
					1768	1.768	2.94927e-05	0.000113313	9.35949e-06	2.10098e-05	0.000173175		173.175	6640.69	34.6058
					1769	1.769	2.95191e-05	0.000113414	9.35374e-06	2.09929e-05	0.00017328		173.28	6636.66	34.5953
					1770	1.77	2.95454e-05	0.000113516	9.348e-06	2.09761e-05	0.000173385		173.385	6632.63	34.5848
					1771	1.771	2.95718e-05	0.000113617	9.34227e-06	2.09593e-05	0.00017349		173.49	6628.61	34.5743
					1772	1.772	2.95982e-05	0.000113718	9.33654e-06	2.09425e-05	0.000173596		173.596	6624.59	34.5638
					1773	1.773	2.96246e-05	0.00011382	9.33082e-06	2.09257e-05	0.000173701		173.701	6620.58	34.5533
					1774	1.774	2.9651e-05	0.000113921	9.3251e-06	2.0909e-05	0.000173806		173.806	6616.56	34.5429
					1775	1.775	2.96774e-05	0.000114023	9.31939e-06	2.08922e-05	0.000173912		173.912	6612.55	34.5324
					1776	1.776	2.97038e-05	0.000114124	9.31368e-06	2.08755e-05	0.000174017		174.017	6608.54	34.5219
					1777	1.777	2.97302e-05	0.000114226	9.30798e-06	2.08588e-05	0.000174123		174.123	6604.54	34.5115
					1778	1.778	2.97567e-05	0.000114327	9.30229e-06	2.08422e-05	0.000174228		174.228	6600.54	34.501
					1779	1.779	2.97831e-05	0.000114429	9.2966e-06	2.08255e-05	0.000174334		174.334	6596.54	34.4906
					1780	1.78	2.98095e-05	0.00011453	9.29092e-06	2.08089e-05	0.00017444		174.44	6592.54	34.4801
					1781	1.781	2.9836e-05	0.000114632	9.28524e-06	2.07923e-05	0.000174545		174.545	6588.55	34.4697
					1782	1.782	2.98624e-05	0.000114733	9.27957e-06	2.07757e-05	0.000174651		174.651	6584.56	34.4592
					1783	1.783	2.98889e-05	0.000114835	9.27391e-06	2.07591e-05	0.000174757		174.757	6580.57	34.4488
					1784	1.784	2.99153e-05	0.000114937	9.26825e-06	2.07426e-05	0.000174863		174.863	6576.58	34.4384
					1785	1.785	2.99418e-05	0.000115038	9.26259e-06	2.0726e-05	0.000174969		174.969	6572.6	34.4279
					1786	1.786	2.99682e-05	0.00011514	9.25694e-06	2.07095e-05	0.000175075		175.075	6568.62	34.4175
					1787	1.787	2.99947e-05	0.000115242	9.2513e-06	2.06931e-05	0.000175181		175.181	6564.65	34.4071
					1788	1.788	3.00212e-05	0.000115343	9.24566e-06	2.06766e-05	0.000175287		175.287	6560.67	34.3967
					1789	1.789	3.00477e-05	0.000115445	9.24003e-06	2.06601e-05	0.000175393		175.393	6556.7	34.3863
					1790	1.79	3.00742e-05	0.000115547	9.23441e-06	2.06437e-05	0.000175499		175.499	6552.74	34.3759
					1791	1.791	3.01006e-05	0.000115649	9.22879e-06	2.06273e-05	0.000175605		175.605	6548.77	34.3655
					1792	1.792	3.01271e-05	0.000115751	9.22317e-06	2.06109e-05	0.000175712		175.712	6544.81	34.3551
					1793	1.793	3.01536e-05	0.000115852	9.21756e-06	2.05946e-05	0.000175818		175.818	6540.85	34.3447
					1794	1.794	3.01802e-05	0.000115954	9.21196e-06	2.05782e-05	0.000175925		175.925	6536.89	34.3343
					1795	1.795	3.02067e-05	0.000116056	9.20636e-06	2.05619e-05	0.000176031		176.031	6532.94	34.3239
					1796	1.796	3.02332e-05	0.000116158	9.20077e-06	2.05456e-05	0.000176138		176.138	6528.99	34.3135
					1797	1.797	3.02597e-05	0.00011626	9.19518e-06	2.05293e-05	0.000176244		176.244	6525.04	34.3031
					1798	1.798	3.02862e-05	0.000116362	9.1896e-06	2.0513e-05	0.000176351		176.351	6521.1	34.2928
					1799	1.799	3.03128e-05	0.000116464	9.18402e-06	2.04968e-05	0.000176457		176.457	6517.15	34.2824
					1800	1.8	3.03393e-05	0.000116566	9.17845e-06	2.04806e-05	0.000176564		176.564	6513.22	34.272
					1801	1.801	3.03659e-05	0.000116668	9.17289e-06	2.04644e-05	0.000176671		176.671	6509.28	34.2617
					1802	1.802	3.03924e-05	0.00011677	9.16733e-06	2.04482e-05	0.000176778		176.778	6505.35	34.2513
					1803	1.803	3.0419e-05	0.000116872	9.16178e-06	2.0432e-05	0.000176885		176.885	6501.42	34.241
					1804	1.804	3.04455e-05	0.000116974	9.15623e-06	2.04159e-05	0.000176991		176.991	6497.49	34.2306
					1805	1.805	3.04721e-05	0.000117076	9.15068e-06	2.03997e-05	0.000177098		177.098	6493.56	34.2203
					1806	1.806	3.04987e-05	0.000117178	9.14515e-06	2.03836e-05	0.000177205		177.205	6489.64	34.21
					1807	1.807	3.05253e-05	0.00011728	9.13962e-06	2.03675e-05	0.000177313		177.313	6485.72	34.1996
					1808	1.808	3.05518e-05	0.000117382	9.13409e-06	2.03515e-05	0.00017742		177.42	6481.81	34.1893
					1809	1.809	3.05784e-05	0.000117484	9.12857e-06	2.03354e-05	0.000177527		177.527	6477.89	34.179
					1810	1.81	3.0605e-05	0.000117587	9.12305e-06	2.03194e-05	0.000177634		177.634	6473.98	34.1687
					1811	1.811	3.06316e-05	0.000117689	9.11754e-06	2.03034e-05	0.000177741		177.741	6470.08	34.1584
					1812	1.812	3.06582e-05	0.000117791	9.11204e-06	2.02874e-05	0.000177849		177.849	6466.17	34.148
					1813	1.813	3.06848e-05	0.000117893	9.10654e-06	2.02714e-05	0.000177956		177.956	6462.27	34.1377
					1814	1.814	3.07115e-05	0.000117995	9.10104e-06	2.02555e-05	0.000178063		178.063	6458.37	34.1274
					1815	1.815	3.07381e-05	0.000118098	9.09556e-06	2.02395e-05	0.000178171		178.171	6454.48	34.1172
					1816	1.816	3.07647e-05	0.0001182	9.09007e-06	2.02236e-05	0.000178278		178.278	6450.58	34.1069
					1817	1.817	3.07913e-05	0.000118302	9.0846e-06	2.02077e-05	0.000178386		178.386	6446.69	34.0966
					1818	1.818	3.0818e-05	0.000118405	9.07912e-06	2.01918e-05	0.000178494		178.494	6442.81	34.0863
					1819	1.819	3.08446e-05	0.000118507	9.07366e-06	2.0176e-05	0.000178601		178.601	6438.92	34.076
					1820	1.82	3.08713e-05	0.000118609	9.0682e-06	2.01602e-05	0.000178709		178.709	6435.04	34.0657
					1821	1.821	3.08979e-05	0.000118712	9.06274e-06	2.01443e-05	0.000178817		178.817	6431.16	34.0555
					1822	1.822	3.09246e-05	0.000118814	9.05729e-06	2.01285e-05	0.000178925		178.925	6427.29	34.0452
					1823	1.823	3.09512e-05	0.000118917	9.05184e-06	2.01128e-05	0.000179033		179.033	6423.41	34.035
					1824	1.824	3.09779e-05	0.000119019	9.0464e-06	2.0097e-05	0.00017914		179.14	6419.54	34.0247
					1825	1.825	3.10046e-05	0.000119122	9.04097e-06	2.00812e-05	0.000179248		179.248	6415.68	34.0145
					1826	1.826	3.10312e-05	0.000119224	9.03554e-06	2.00655e-05	0.000179356		179.356	6411.81	34.0042
					1827	1.827	3.10579e-05	0.000119327	9.03012e-06	2.00498e-05	0.000179465		179.465	6407.95	33.994
					1828	1.828	3.10846e-05	0.000119429	9.0247e-06	2.00341e-05	0.000179573		179.573	6404.09	33.9837
					1829	1.829	3.11113e-05	0.000119532	9.01928e-06	2.00185e-05	0.000179681		179.681	6400.24	33.9735
					1830	1.83	3.1138e-05	0.000119634	9.01388e-06	2.00028e-05	0.000179789		179.789	6396.39	33.9633
					1831	1.831	3.11647e-05	0.000119737	9.00847e-06	1.99872e-05	0.000179897		179.897	6392.54	33.9531
					1832	1.832	3.11914e-05	0.00011984	9.00307e-06	1.99716e-05	0.000180006		180.006	6388.69	33.9428
					1833	1.833	3.12181e-05	0.000119942	8.99768e-06	1.9956e-05	0.000180114		180.114	6384.85	33.9326
					1834	1.834	3.12449e-05	0.000120045	8.9923e-06	1.99404e-05	0.000180222		180.222	6381	33.9224
					1835	1.835	3.12716e-05	0.000120148	8.98691e-06	1.99249e-05	0.000180331		180.331	6377.17	33.9122
					1836	1.836	3.12983e-05	0.00012025	8.98154e-06	1.99093e-05	0.000180439		180.439	6373.33	33.902
					1837	1.837	3.1325e-05	0.000120353	8.97617e-06	1.98938e-05	0.000180548		180.548	6369.5	33.8918
					1838	1.838	3.13518e-05	0.000120456	8.9708e-06	1.98783e-05	0.000180657		180.657	6365.67	33.8816
					1839	1.839	3.13785e-05	0.000120558	8.96544e-06	1.98628e-05	0.000180765		180.765	6361.84	33.8714
					1840	1.84	3.14053e-05	0.000120661	8.96008e-06	1.98474e-05	0.000180874		180.874	6358.02	33.8613
					1841	1.841	3.1432e-05	0.000120764	8.95473e-06	1.98319e-05	0.000180983		180.983	6354.2	33.8511
					1842	1.842	3.14588e-05	0.000120867	8.94939e-06	1.98165e-05	0.000181091		181.091	6350.38	33.8409
					1843	1.843	3.14856e-05	0.00012097	8.94405e-06	1.98011e-05	0.0001812		181.2	6346.57	33.8308
					1844	1.844	3.15123e-05	0.000121073	8.93871e-06	1.97857e-05	0.000181309		181.309	6342.75	33.8206
					1845	1.845	3.15391e-05	0.000121175	8.93338e-06	1.97703e-05	0.000181418		181.418	6338.95	33.8104
					1846	1.846	3.15659e-05	0.000121278	8.92806e-06	1.9755e-05	0.000181527		181.527	6335.14	33.8003
					1847	1.847	3.15927e-05	0.000121381	8.92274e-06	1.97396e-05	0.000181636		181.636	6331.34	33.7901
					1848	1.848	3.16195e-05	0.000121484	8.91743e-06	1.97243e-05	0.000181745		181.745	6327.54	33.78
					1849	1.849	3.16463e-05	0.000121587	8.91212e-06	1.9709e-05	0.000181854		181.854	6323.74	33.7699
					1850	1.85	3.16731e-05	0.00012169	8.90681e-06	1.96938e-05	0.000181964		181.964	6319.94	33.7597
					1851	1.851	3.16999e-05	0.000121793	8.90151e-06	1.96785e-05	0.000182073		182.073	6316.15	33.7496
					1852	1.852	3.17267e-05	0.000121896	8.89622e-06	1.96632e-05	0.000182182		182.182	6312.36	33.7395
					1853	1.853	3.17535e-05	0.000121999	8.89093e-06	1.9648e-05	0.000182292		182.292	6308.58	33.7294
					1854	1.854	3.17803e-05	0.000122102	8.88565e-06	1.96328e-05	0.000182401		182.401	6304.79	33.7192
					1855	1.855	3.18071e-05	0.000122205	8.88037e-06	1.96176e-05	0.00018251		182.51	6301.01	33.7091
					1856	1.856	3.1834e-05	0.000122308	8.8751e-06	1.96025e-05	0.00018262		182.62	6297.24	33.699
					1857	1.857	3.18608e-05	0.000122411	8.86983e-06	1.95873e-05	0.000182729		182.729	6293.46	33.6889
					1858	1.858	3.18876e-05	0.000122514	8.86457e-06	1.95722e-05	0.000182839		182.839	6289.69	33.6788
					1859	1.859	3.19145e-05	0.000122618	8.85931e-06	1.95571e-05	0.000182948		182.948	6285.92	33.6687
					1860	1.86	3.19413e-05	0.000122721	8.85406e-06	1.9542e-05	0.000183058		183.058	6282.16	33.6586
					1861	1.861	3.19682e-05	0.000122824	8.84881e-06	1.95269e-05	0.000183168		183.168	6278.39	33.6486
					1862	1.862	3.19951e-05	0.000122927	8.84356e-06	1.95118e-05	0.000183278		183.278	6274.63	33.6385
					1863	1.863	3.20219e-05	0.00012303	8.83833e-06	1.94968e-05	0.000183387		183.387	6270.88	33.6284
					1864	1.864	3.20488e-05	0.000123134	8.83309e-06	1.94817e-05	0.000183497		183.497	6267.12	33.6184
					1865	1.865	3.20757e-05	0.000123237	8.82787e-06	1.94667e-05	0.000183607		183.607	6263.37	33.6083
					1866	1.866	3.21025e-05	0.00012334	8.82264e-06	1.94517e-05	0.000183717		183.717	6259.62	33.5982
					1867	1.867	3.21294e-05	0.000123443	8.81743e-06	1.94368e-05	0.000183827		183.827	6255.88	33.5882
					1868	1.868	3.21563e-05	0.000123547	8.81221e-06	1.94218e-05	0.000183937		183.937	6252.14	33.5781
					1869	1.869	3.21832e-05	0.00012365	8.80701e-06	1.94069e-05	0.000184047		184.047	6248.4	33.5681
					1870	1.87	3.22101e-05	0.000123753	8.8018e-06	1.93919e-05	0.000184157		184.157	6244.66	33.558
					1871	1.871	3.2237e-05	0.000123857	8.79661e-06	1.9377e-05	0.000184268		184.268	6240.93	33.548
					1872	1.872	3.22639e-05	0.00012396	8.79141e-06	1.93621e-05	0.000184378		184.378	6237.2	33.538
					1873	1.873	3.22909e-05	0.000124064	8.78623e-06	1.93473e-05	0.000184488		184.488	6233.47	33.528
					1874	1.874	3.23178e-05	0.000124167	8.78104e-06	1.93324e-05	0.000184598		184.598	6229.74	33.5179
					1875	1.875	3.23447e-05	0.000124271	8.77587e-06	1.93176e-05	0.000184709		184.709	6226.02	33.5079
					1876	1.876	3.23716e-05	0.000124374	8.77069e-06	1.93028e-05	0.000184819		184.819	6222.3	33.4979
					1877	1.877	3.23986e-05	0.000124477	8.76553e-06	1.9288e-05	0.00018493		184.93	6218.58	33.4879
					1878	1.878	3.24255e-05	0.000124581	8.76036e-06	1.92732e-05	0.00018504		185.04	6214.87	33.4779
					1879	1.879	3.24524e-05	0.000124685	8.75521e-06	1.92584e-05	0.000185151		185.151	6211.16	33.4679
					1880	1.88	3.24794e-05	0.000124788	8.75005e-06	1.92437e-05	0.000185261		185.261	6207.45	33.4579
					1881	1.881	3.25064e-05	0.000124892	8.7449e-06	1.92289e-05	0.000185372		185.372	6203.75	33.4479
					1882	1.882	3.25333e-05	0.000124995	8.73976e-06	1.92142e-05	0.000185483		185.483	6200.05	33.438
					1883	1.883	3.25603e-05	0.000125099	8.73462e-06	1.91995e-05	0.000185593		185.593	6196.35	33.428
					1884	1.884	3.25872e-05	0.000125202	8.72949e-06	1.91849e-05	0.000185704		185.704	6192.65	33.418
					1885	1.885	3.26142e-05	0.000125306	8.72436e-06	1.91702e-05	0.000185815		185.815	6188.96	33.408
					1886	1.886	3.26412e-05	0.00012541	8.71924e-06	1.91556e-05	0.000185926		185.926	6185.27	33.3981
					1887	1.887	3.26682e-05	0.000125513	8.71412e-06	1.91409e-05	0.000186037		186.037	6181.58	33.3881
					1888	1.888	3.26952e-05	0.000125617	8.70901e-06	1.91263e-05	0.000186148		186.148	6177.89	33.3782
					1889	1.889	3.27222e-05	0.000125721	8.7039e-06	1.91117e-05	0.000186259		186.259	6174.21	33.3682
					1890	1.89	3.27492e-05	0.000125825	8.69879e-06	1.90971e-05	0.00018637		186.37	6170.53	33.3583
					1891	1.891	3.27762e-05	0.000125928	8.69369e-06	1.90826e-05	0.000186481		186.481	6166.86	33.3483
					1892	1.892	3.28032e-05	0.000126032	8.6886e-06	1.9068e-05	0.000186592		186.592	6163.19	33.3384
					1893	1.893	3.28302e-05	0.000126136	8.68351e-06	1.90535e-05	0.000186703		186.703	6159.51	33.3285
					1894	1.894	3.28572e-05	0.00012624	8.67843e-06	1.9039e-05	0.000186814		186.814	6155.85	33.3186
					1895	1.895	3.28842e-05	0.000126343	8.67335e-06	1.90245e-05	0.000186926		186.926	6152.18	33.3086
					1896	1.896	3.29113e-05	0.000126447	8.66827e-06	1.901e-05	0.000187037		187.037	6148.52	33.2987
					1897	1.897	3.29383e-05	0.000126551	8.6632e-06	1.89956e-05	0.000187148		187.148	6144.86	33.2888
					1898	1.898	3.29653e-05	0.000126655	8.65814e-06	1.89811e-05	0.00018726		187.26	6141.21	33.2789
					1899	1.899	3.29924e-05	0.000126759	8.65307e-06	1.89667e-05	0.000187371		187.371	6137.55	33.269
					1900	1.9	3.30194e-05	0.000126863	8.64802e-06	1.89523e-05	0.000187483		187.483	6133.9	33.2591
					1901	1.901	3.30465e-05	0.000126967	8.64297e-06	1.89379e-05	0.000187594		187.594	6130.26	33.2492
					1902	1.902	3.30735e-05	0.000127071	8.63792e-06	1.89235e-05	0.000187706		187.706	6126.61	33.2393
					1903	1.903	3.31006e-05	0.000127175	8.63288e-06	1.89092e-05	0.000187817		187.817	6122.97	33.2295
					1904	1.904	3.31276e-05	0.000127279	8.62784e-06	1.88948e-05	0.000187929		187.929	6119.33	33.2196
					1905	1.905	3.31547e-05	0.000127383	8.62281e-06	1.88805e-05	0.000188041		188.041	6115.7	33.2097
					1906	1.906	3.31818e-05	0.000127487	8.61778e-06	1.88662e-05	0.000188152		188.152	6112.07	33.1999
					1907	1.907	3.32089e-05	0.000127591	8.61276e-06	1.88519e-05	0.000188264		188.264	6108.44	33.19
					1908	1.908	3.32359e-05	0.000127695	8.60774e-06	1.88376e-05	0.000188376		188.376	6104.81	33.1801
					1909	1.909	3.3263e-05	0.000127799	8.60273e-06	1.88234e-05	0.000188488		188.488	6101.18	33.1703
					1910	1.91	3.32901e-05	0.000127903	8.59772e-06	1.88091e-05	0.0001886		188.6	6097.56	33.1605
					1911	1.911	3.33172e-05	0.000128007	8.59272e-06	1.87949e-05	0.000188712		188.712	6093.94	33.1506
					1912	1.912	3.33443e-05	0.000128111	8.58772e-06	1.87807e-05	0.000188824		188.824	6090.33	33.1408
					1913	1.913	3.33714e-05	0.000128215	8.58273e-06	1.87665e-05	0.000188936		188.936	6086.72	33.1309
					1914	1.914	3.33985e-05	0.00012832	8.57774e-06	1.87523e-05	0.000189048		189.048	6083.11	33.1211
					1915	1.915	3.34257e-05	0.000128424	8.57275e-06	1.87382e-05	0.00018916		189.16	6079.5	33.1113
					1916	1.916	3.34528e-05	0.000128528	8.56777e-06	1.8724e-05	0.000189272		189.272	6075.9	33.1015
					1917	1.917	3.34799e-05	0.000128632	8.5628e-06	1.87099e-05	0.000189385		189.385	6072.3	33.0917
					1918	1.918	3.3507e-05	0.000128736	8.55783e-06	1.86958e-05	0.000189497		189.497	6068.7	33.0819
					1919	1.919	3.35342e-05	0.000128841	8.55286e-06	1.86817e-05	0.000189609		189.609	6065.1	33.0721
					1920	1.92	3.35613e-05	0.000128945	8.5479e-06	1.86676e-05	0.000189722		189.722	6061.51	33.0623
					1921	1.921	3.35885e-05	0.000129049	8.54294e-06	1.86536e-05	0.000189834		189.834	6057.92	33.0525
					1922	1.922	3.36156e-05	0.000129153	8.53799e-06	1.86395e-05	0.000189947		189.947	6054.33	33.0427
					1923	1.923	3.36428e-05	0.000129258	8.53304e-06	1.86255e-05	0.000190059		190.059	6050.75	33.0329
					1924	1.924	3.36699e-05	0.000129362	8.5281e-06	1.86115e-05	0.000190172		190.172	6047.17	33.0231
					1925	1.925	3.36971e-05	0.000129467	8.52316e-06	1.85975e-05	0.000190284		190.284	6043.59	33.0134
					1926	1.926	3.37243e-05	0.000129571	8.51823e-06	1.85835e-05	0.000190397		190.397	6040.01	33.0036
					1927	1.927	3.37514e-05	0.000129675	8.5133e-06	1.85695e-05	0.00019051		190.51	6036.44	32.9938
					1928	1.928	3.37786e-05	0.00012978	8.50838e-06	1.85556e-05	0.000190622		190.622	6032.87	32.9841
					1929	1.929	3.38058e-05	0.000129884	8.50346e-06	1.85416e-05	0.000190735		190.735	6029.31	32.9743
					1930	1.93	3.3833e-05	0.000129989	8.49854e-06	1.85277e-05	0.000190848		190.848	6025.74	32.9646
					1931	1.931	3.38602e-05	0.000130093	8.49363e-06	1.85138e-05	0.000190961		190.961	6022.18	32.9548
					1932	1.932	3.38874e-05	0.000130198	8.48872e-06	1.84999e-05	0.000191074		191.074	6018.62	32.9451
					1933	1.933	3.39146e-05	0.000130302	8.48382e-06	1.84861e-05	0.000191187		191.187	6015.07	32.9354
					1934	1.934	3.39418e-05	0.000130407	8.47893e-06	1.84722e-05	0.0001913		191.3	6011.52	32.9256
					1935	1.935	3.3969e-05	0.000130511	8.47403e-06	1.84584e-05	0.000191413		191.413	6007.97	32.9159
					1936	1.936	3.39962e-05	0.000130616	8.46915e-06	1.84445e-05	0.000191526		191.526	6004.42	32.9062
					1937	1.937	3.40234e-05	0.00013072	8.46426e-06	1.84307e-05	0.000191639		191.639	6000.88	32.8965
					1938	1.938	3.40506e-05	0.000130825	8.45939e-06	1.84169e-05	0.000191752		191.752	5997.34	32.8868
					1939	1.939	3.40779e-05	0.000130929	8.45451e-06	1.84032e-05	0.000191865		191.865	5993.8	32.8771
					1940	1.94	3.41051e-05	0.000131034	8.44964e-06	1.83894e-05	0.000191978		191.978	5990.26	32.8674
					1941	1.941	3.41323e-05	0.000131139	8.44478e-06	1.83757e-05	0.000192092		192.092	5986.73	32.8577
					1942	1.942	3.41596e-05	0.000131243	8.43992e-06	1.83619e-05	0.000192205		192.205	5983.2	32.848
					1943	1.943	3.41868e-05	0.000131348	8.43506e-06	1.83482e-05	0.000192318		192.318	5979.67	32.8383
					1944	1.944	3.42141e-05	0.000131453	8.43021e-06	1.83345e-05	0.000192432		192.432	5976.15	32.8286
					1945	1.945	3.42413e-05	0.000131558	8.42536e-06	1.83208e-05	0.000192545		192.545	5972.63	32.819
					1946	1.946	3.42686e-05	0.000131662	8.42052e-06	1.83072e-05	0.000192659		192.659	5969.11	32.8093
					1947	1.947	3.42959e-05	0.000131767	8.41568e-06	1.82935e-05	0.000192772		192.772	5965.6	32.7996
					1948	1.948	3.43231e-05	0.000131872	8.41085e-06	1.82799e-05	0.000192886		192.886	5962.08	32.79
					1949	1.949	3.43504e-05	0.000131977	8.40602e-06	1.82663e-05	0.000192999		192.999	5958.57	32.7803
					1950	1.95	3.43777e-05	0.000132081	8.4012e-06	1.82527e-05	0.000193113		193.113	5955.07	32.7707
					1951	1.951	3.4405e-05	0.000132186	8.39638e-06	1.82391e-05	0.000193227		193.227	5951.56	32.761
					1952	1.952	3.44322e-05	0.000132291	8.39156e-06	1.82255e-05	0.00019334		193.34	5948.06	32.7514
					1953	1.953	3.44595e-05	0.000132396	8.38675e-06	1.82119e-05	0.000193454		193.454	5944.56	32.7418
					1954	1.954	3.44868e-05	0.000132501	8.38194e-06	1.81984e-05	0.000193568		193.568	5941.07	32.7321
					1955	1.955	3.45141e-05	0.000132606	8.37714e-06	1.81849e-05	0.000193682		193.682	5937.58	32.7225
					1956	1.956	3.45414e-05	0.000132711	8.37234e-06	1.81714e-05	0.000193796		193.796	5934.09	32.7129
					1957	1.957	3.45687e-05	0.000132815	8.36755e-06	1.81579e-05	0.00019391		193.91	5930.6	32.7033
					1958	1.958	3.45961e-05	0.00013292	8.36276e-06	1.81444e-05	0.000194024		194.024	5927.11	32.6937
					1959	1.959	3.46234e-05	0.000133025	8.35798e-06	1.81309e-05	0.000194138		194.138	5923.63	32.6841
					1960	1.96	3.46507e-05	0.00013313	8.3532e-06	1.81175e-05	0.000194252		194.252	5920.16	32.6745
					1961	1.961	3.4678e-05	0.000133235	8.34842e-06	1.8104e-05	0.000194366		194.366	5916.68	32.6649
					1962	1.962	3.47053e-05	0.00013334	8.34365e-06	1.80906e-05	0.00019448		194.48	5913.21	32.6553
					1963	1.963	3.47327e-05	0.000133445	8.33888e-06	1.80772e-05	0.000194594		194.594	5909.74	32.6457
					1964	1.964	3.476e-05	0.00013355	8.33412e-06	1.80638e-05	0.000194708		194.708	5906.27	32.6362
					1965	1.965	3.47874e-05	0.000133655	8.32936e-06	1.80504e-05	0.000194823		194.823	5902.81	32.6266
					1966	1.966	3.48147e-05	0.000133761	8.32461e-06	1.80371e-05	0.000194937		194.937	5899.34	32.617
					1967	1.967	3.48421e-05	0.000133866	8.31986e-06	1.80237e-05	0.000195051		195.051	5895.89	32.6074
					1968	1.968	3.48694e-05	0.000133971	8.31511e-06	1.80104e-05	0.000195166		195.166	5892.43	32.5979
					1969	1.969	3.48968e-05	0.000134076	8.31037e-06	1.79971e-05	0.00019528		195.28	5888.98	32.5883
					1970	1.97	3.49242e-05	0.000134181	8.30564e-06	1.79838e-05	0.000195395		195.395	5885.53	32.5788
					1971	1.971	3.49515e-05	0.000134286	8.30091e-06	1.79705e-05	0.000195509		195.509	5882.08	32.5692
					1972	1.972	3.49789e-05	0.000134391	8.29618e-06	1.79572e-05	0.000195624		195.624	5878.64	32.5597
					1973	1.973	3.50063e-05	0.000134497	8.29145e-06	1.7944e-05	0.000195738		195.738	5875.19	32.5502
					1974	1.974	3.50337e-05	0.000134602	8.28674e-06	1.79307e-05	0.000195853		195.853	5871.75	32.5407
					1975	1.975	3.50611e-05	0.000134707	8.28202e-06	1.79175e-05	0.000195968		195.968	5868.32	32.5311
					1976	1.976	3.50884e-05	0.000134812	8.27731e-06	1.79043e-05	0.000196082		196.082	5864.89	32.5216
					1977	1.977	3.51158e-05	0.000134917	8.27261e-06	1.78911e-05	0.000196197		196.197	5861.46	32.5121
					1978	1.978	3.51432e-05	0.000135023	8.2679e-06	1.78779e-05	0.000196312		196.312	5858.03	32.5026
					1979	1.979	3.51707e-05	0.000135128	8.26321e-06	1.78647e-05	0.000196427		196.427	5854.6	32.4931
					1980	1.98	3.51981e-05	0.000135233	8.25851e-06	1.78516e-05	0.000196542		196.542	5851.18	32.4836
					1981	1.981	3.52255e-05	0.000135339	8.25382e-06	1.78384e-05	0.000196656		196.656	5847.76	32.4741
					1982	1.982	3.52529e-05	0.000135444	8.24914e-06	1.78253e-05	0.000196771		196.771	5844.35	32.4646
					1983	1.983	3.52803e-05	0.000135549	8.24446e-06	1.78122e-05	0.000196886		196.886	5840.93	32.4551
					1984	1.984	3.53077e-05	0.000135655	8.23978e-06	1.77991e-05	0.000197001		197.001	5837.52	32.4457
					1985	1.985	3.53352e-05	0.00013576	8.23511e-06	1.7786e-05	0.000197116		197.116	5834.11	32.4362
					1986	1.986	3.53626e-05	0.000135866	8.23045e-06	1.7773e-05	0.000197232		197.232	5830.71	32.4267
					1987	1.987	3.53901e-05	0.000135971	8.22578e-06	1.77599e-05	0.000197347		197.347	5827.31	32.4173
					1988	1.988	3.54175e-05	0.000136076	8.22112e-06	1.77469e-05	0.000197462		197.462	5823.91	32.4078
					1989	1.989	3.54449e-05	0.000136182	8.21647e-06	1.77339e-05	0.000197577		197.577	5820.51	32.3983
					1990	1.99	3.54724e-05	0.000136287	8.21182e-06	1.77209e-05	0.000197692		197.692	5817.12	32.3889
					1991	1.991	3.54999e-05	0.000136393	8.20717e-06	1.77079e-05	0.000197808		197.808	5813.73	32.3795
					1992	1.992	3.55273e-05	0.000136498	8.20253e-06	1.76949e-05	0.000197923		197.923	5810.34	32.37
					1993	1.993	3.55548e-05	0.000136604	8.19789e-06	1.76819e-05	0.000198039		198.039	5806.95	32.3606
					1994	1.994	3.55823e-05	0.000136709	8.19326e-06	1.7669e-05	0.000198154		198.154	5803.57	32.3512
					1995	1.995	3.56097e-05	0.000136815	8.18863e-06	1.76561e-05	0.000198269		198.269	5800.19	32.3417
					1996	1.996	3.56372e-05	0.000136921	8.184e-06	1.76431e-05	0.000198385		198.385	5796.81	32.3323
					1997	1.997	3.56647e-05	0.000137026	8.17938e-06	1.76302e-05	0.0001985		198.5	5793.44	32.3229
[truncated: 3 more rows]
